# Supplementary material for: RNAthor – fast, accurate normalization, visualization and statistical analysis of RNA probing data resolved by capillary electrophoresis
Source: PubMed Central journal article supplement (PMC7529196; doi:10.1371/journal.pone.0239287), 2020-10-01
Supplement: pone.0239287.s001.pdf [file pone.0239287.s001.pdf]

**RNAthor – fast, accurate normalization, visualization and statistical analysis  
of RNA probing data resolved by capillary electrophoresis**

Julita Gumna<sup>1</sup>, Tomasz Zok<sup>2</sup>, Kacper Figurski<sup>2</sup>, Katarzyna Pachulska-Wieczorek<sup>1\*</sup>, Marta Szachniuk<sup>1,2\*</sup>

<sup>1</sup> Institute of Bioorganic Chemistry, Polish Academy of Sciences, Poznan, Poland

<sup>2</sup> Institute of Computing Science, Poznan University of Technology, Poznan, Poland

\* Corresponding authors

Email: [kasiapw@ibch.poznan.pl](mailto:kasiapw@ibch.poznan.pl), [mszachniuk@cs.put.poznan.pl](mailto:mszachniuk@cs.put.poznan.pl)

## SHAPE\_example\_1\_peaks.txt

| seqnum | seq | RX.pos | RX.sigma | RX.area | RX.rms | BG.pos | BG.sigma | BG.area | BG.rms | (RX.area-BG.area) |
|--------|-----|--------|----------|---------|--------|--------|----------|---------|--------|-------------------|
| 6      | G   | 9261   | 3.91     | 2569.8  | 96.8   | 9256   | 4.25     | 1054.1  | 19.9   | 1515.7            |
| 7      | A   | 9246   | 4.02     | 7754.4  | 50.7   | 9242   | 4.12     | 2215.8  | 24.2   | 5538.7            |
| 8      | A   | 9230   | 3.05     | 891.4   | 68.0   | 9225   | 5.19     | 20.4    | 42.7   | 871.0             |
| 9      | C   | 9213   | 4.73     | 10583.9 | 145.9  | 9208   | 4.65     | 3532.0  | 53.9   | 7051.9            |
| 10     | U   | 9198   | 4.87     | 20872.3 | 142.5  | 9194   | 5.69     | 7087.7  | 109.1  | 13784.6           |
| 11     | U   | 9181   | 5.06     | 6704.5  | 108.3  | 9172   | 6.50     | 3647.2  | 130.7  | 3057.3            |
| 12     | C   | 9165   | 4.92     | 14290.6 | 168.4  | 9161   | 4.65     | 4248.1  | 77.6   | 10042.4           |
| 13     | U   | 9149   | 4.67     | 24957.5 | 201.7  | 9145   | 4.95     | 6180.2  | 67.6   | 18777.3           |
| 14     | A   | 9133   | 3.93     | 9551.8  | 90.8   | 9129   | 3.95     | 1690.0  | 38.2   | 7861.9            |
| 15     | G   | 9117   | 3.05     | 1243.3  | 77.9   | 9113   | 2.66     | 314.6   | 28.8   | 928.8             |
| 16     | U   | 9102   | 3.75     | 5774.3  | 75.5   | 9098   | 4.30     | 1689.5  | 25.8   | 4084.9            |
| 17     | A   | 9086   | 3.83     | 6657.7  | 73.6   | 9082   | 4.08     | 1986.1  | 28.0   | 4671.6            |
| 18     | U   | 9068   | 3.12     | 775.8   | 102.8  | 9066   | 2.66     | 291.5   | 29.9   | 484.3             |
| 19     | A   | 9054   | 4.40     | 7719.2  | 69.2   | 9051   | 5.45     | 2538.8  | 52.2   | 5180.4            |
| 20     | U   | 9039   | 4.53     | 7468.8  | 154.2  | 9033   | 4.24     | 2157.1  | 39.6   | 5311.7            |
| 21     | U   | 9023   | 5.20     | 17359.1 | 136.7  | 9018   | 6.26     | 4499.9  | 106.3  | 12859.2           |
| 22     | C   | 9005   | 5.15     | 21565.6 | 197.9  | 9000   | 5.65     | 7083.6  | 169.2  | 14481.9           |
| 23     | U   | 8990   | 4.91     | 25162.0 | 251.8  | 8987   | 5.23     | 8135.0  | 70.6   | 17027.0           |
| 24     | G   | 8977   | 5.14     | 17892.4 | 227.9  | 8973   | 5.81     | 4633.3  | 57.4   | 13259.2           |
| 25     | U   | 8961   | 5.30     | 14497.2 | 123.3  | 8958   | 5.56     | 4076.0  | 58.5   | 10421.1           |
| 26     | A   | 8946   | 6.30     | 1522.2  | 93.8   | 8943   | 2.66     | 0.0     | 52.1   | 1522.2            |
| 27     | U   | 8931   | 3.80     | 6411.6  | 138.0  | 8928   | 4.21     | 2103.7  | 30.9   | 4307.9            |
| 28     | A   | 8914   | 3.05     | 3905.1  | 63.3   | 8912   | 2.66     | 494.9   | 34.8   | 3410.2            |
| 29     | C   | 8897   | 3.20     | 2843.0  | 138.0  | 8894   | 3.04     | 375.7   | 37.7   | 2467.3            |
| 30     | C   | 8880   | 4.57     | 16452.2 | 93.9   | 8876   | 5.00     | 4125.6  | 46.3   | 12326.6           |
| 31     | U   | 8865   | 4.95     | 16488.1 | 179.1  | 8861   | 5.16     | 3983.0  | 51.4   | 12505.1           |
| 32     | A   | 8849   | 4.90     | 25221.3 | 189.2  | 8846   | 4.93     | 4286.3  | 55.2   | 20935.0           |
| 33     | A   | 8833   | 4.80     | 15751.4 | 138.5  | 8830   | 4.27     | 1525.0  | 39.6   | 14226.4           |
| 34     | U   | 8817   | 4.43     | 17732.6 | 119.7  | 8814   | 4.01     | 3546.7  | 40.8   | 14185.9           |
| 35     | A   | 8801   | 4.48     | 29249.7 | 199.9  | 8798   | 3.89     | 4071.5  | 43.7   | 25178.2           |
| 36     | U   | 8785   | 4.60     | 16081.0 | 190.7  | 8781   | 4.08     | 1064.1  | 41.8   | 15016.9           |
| 37     | U   | 8770   | 4.60     | 32748.9 | 189.2  | 8766   | 3.85     | 3303.7  | 48.7   | 29445.2           |
| 38     | A   | 8754   | 4.65     | 17214.2 | 180.0  | 8751   | 3.76     | 3101.4  | 39.3   | 14112.9           |
| 39     | U   | 8739   | 4.45     | 7094.5  | 62.1   | 8736   | 2.66     | 0.0     | 36.3   | 7094.5            |
| 40     | A   | 8723   | 4.20     | 6384.9  | 42.7   | 8720   | 2.66     | 878.2   | 18.4   | 5506.6            |
| 41     | G   | 8709   | 3.54     | 2902.8  | 47.6   | 8706   | 2.66     | 278.6   | 15.9   | 2624.2            |
| 42     | C   | 8692   | 3.05     | 1125.9  | 31.4   | 8689   | 2.66     | 0.4     | 12.5   | 1125.5            |
| 43     | C   | 8676   | 3.54     | 3635.5  | 55.9   | 8672   | 3.29     | 1022.4  | 18.0   | 2613.1            |
| 44     | U   | 8660   | 4.60     | 3559.5  | 78.2   | 8656   | 3.11     | 928.8   | 23.7   | 2630.8            |
| 45     | U   | 8644   | 4.60     | 6810.3  | 147.6  | 8641   | 4.71     | 912.8   | 45.2   | 5897.5            |
| 46     | U   | 8630   | 4.52     | 23840.4 | 153.9  | 8627   | 4.50     | 3518.9  | 37.7   | 20321.5           |
| 47     | A   | 8614   | 4.36     | 21748.5 | 95.7   | 8611   | 4.22     | 3203.8  | 35.7   | 18544.7           |
| 48     | U   | 8598   | 4.67     | 8856.9  | 185.8  | 8594   | 4.13     | 1944.8  | 74.4   | 6912.1            |

|    |   |      |      |         |       |      |      |        |      |         |
|----|---|------|------|---------|-------|------|------|--------|------|---------|
| 49 | C | 8581 | 4.83 | 22151.5 | 154.0 | 8578 | 5.00 | 8634.9 | 87.1 | 13516.6 |
| 50 | A | 8566 | 4.82 | 22239.6 | 155.3 | 8563 | 5.35 | 5029.4 | 63.6 | 17210.2 |
| 51 | A | 8550 | 4.12 | 17923.9 | 247.0 | 8547 | 3.64 | 4353.7 | 85.9 | 13570.2 |
| 52 | C | 8533 | 3.04 | 7096.2  | 168.1 | 8531 | 2.21 | 738.4  | 30.2 | 6357.8  |
| 53 | A | 8516 | 3.44 | 10615.0 | 80.9  | 8514 | 1.78 | 5.3    | 7.6  | 10609.7 |
| 54 | A | 8500 | 3.71 | 7791.7  | 126.7 | 8496 | 1.78 | 107.7  | 13.5 | 7684.0  |
| 55 | U | 8485 | 4.22 | 13937.1 | 87.7  | 8482 | 3.79 | 2996.4 | 23.5 | 10940.7 |
| 56 | G | 8473 | 4.29 | 6819.9  | 82.8  | 8471 | 4.15 | 2160.3 | 34.5 | 4659.5  |
| 57 | G | 8458 | 4.32 | 1201.6  | 72.4  | 8456 | 4.64 | 63.3   | 18.5 | 1138.2  |
| 58 | A | 8443 | 2.82 | 1682.0  | 23.0  | 8442 | 2.05 | 197.4  | 12.3 | 1484.6  |
| 59 | A | 8428 | 2.82 | 817.2   | 18.6  | 8425 | 1.78 | 85.6   | 11.7 | 731.6   |
| 60 | U | 8413 | 2.90 | 1184.6  | 30.6  | 8411 | 1.99 | 40.4   | 9.3  | 1144.2  |
| 61 | C | 8396 | 3.42 | 4540.5  | 55.0  | 8394 | 2.89 | 1183.0 | 20.7 | 3357.5  |
| 62 | C | 8380 | 2.82 | 1760.1  | 72.4  | 8376 | 2.80 | 714.0  | 35.9 | 1046.1  |
| 63 | C | 8363 | 4.02 | 12960.5 | 98.9  | 8361 | 4.56 | 5195.9 | 59.3 | 7764.7  |
| 64 | A | 8347 | 3.82 | 17363.6 | 197.7 | 8345 | 4.75 | 4004.0 | 48.9 | 13359.6 |
| 65 | A | 8332 | 3.15 | 9307.7  | 139.8 | 8328 | 4.59 | 2635.3 | 46.0 | 6672.4  |
| 66 | C | 8315 | 3.49 | 13647.1 | 201.6 | 8312 | 4.20 | 5761.4 | 71.4 | 7885.7  |
| 67 | A | 8299 | 4.02 | 18327.0 | 83.8  | 8297 | 3.60 | 2697.7 | 41.6 | 15629.3 |
| 68 | A | 8283 | 4.02 | 23418.6 | 82.9  | 8281 | 2.97 | 3093.0 | 44.4 | 20325.6 |
| 69 | U | 8268 | 4.05 | 9086.8  | 125.3 | 8267 | 1.78 | 0.0    | 30.7 | 9086.8  |
| 70 | U | 8254 | 4.17 | 24737.7 | 115.8 | 8252 | 2.84 | 2106.4 | 36.0 | 22631.3 |
| 71 | A | 8239 | 4.10 | 14648.1 | 88.8  | 8236 | 1.78 | 467.2  | 34.6 | 14180.9 |
| 72 | U | 8223 | 3.50 | 5562.8  | 148.2 | 8220 | 1.78 | 52.1   | 18.7 | 5510.8  |
| 73 | C | 8207 | 3.10 | 4353.7  | 50.0  | 8204 | 2.80 | 1011.5 | 15.5 | 3342.2  |
| 74 | U | 8191 | 2.82 | 1166.7  | 48.4  | 8189 | 1.78 | 129.9  | 17.4 | 1036.8  |
| 75 | C | 8176 | 3.91 | 6826.3  | 79.3  | 8174 | 3.80 | 1879.6 | 34.5 | 4946.7  |
| 76 | A | 8161 | 4.25 | 17195.3 | 45.8  | 8159 | 4.20 | 3022.6 | 27.6 | 14172.7 |
| 77 | A | 8146 | 4.20 | 11439.8 | 51.7  | 8143 | 3.75 | 1575.3 | 30.2 | 9864.5  |
| 78 | C | 8129 | 3.68 | 4658.3  | 82.3  | 8127 | 3.97 | 1739.3 | 27.8 | 2919.0  |
| 79 | A | 8114 | 3.85 | 7637.7  | 74.3  | 8111 | 4.20 | 2794.8 | 17.1 | 4842.9  |
| 80 | U | 8099 | 4.00 | 2543.4  | 53.1  | 8097 | 3.98 | 953.1  | 17.9 | 1590.4  |
| 81 | U | 8084 | 3.05 | 422.7   | 34.4  | 8081 | 2.34 | 211.1  | 19.1 | 211.5   |
| 82 | C | 8068 | 3.59 | 3385.4  | 37.1  | 8066 | 3.10 | 874.9  | 17.0 | 2510.5  |
| 83 | A | 8053 | 3.67 | 7317.3  | 66.1  | 8050 | 2.93 | 1013.9 | 20.9 | 6303.4  |
| 84 | C | 8036 | 3.80 | 7133.1  | 100.9 | 8033 | 3.80 | 1704.0 | 48.4 | 5429.1  |
| 85 | C | 8019 | 4.25 | 14172.4 | 70.8  | 8016 | 4.40 | 3734.1 | 37.8 | 10438.3 |
| 86 | C | 8003 | 4.25 | 21301.3 | 67.1  | 8001 | 4.35 | 6293.0 | 38.6 | 15008.3 |
| 87 | A | 7988 | 4.25 | 18111.9 | 60.5  | 7986 | 3.89 | 2114.7 | 52.7 | 15997.3 |
| 88 | A | 7972 | 3.87 | 9545.0  | 135.9 | 7970 | 2.51 | 1271.2 | 30.8 | 8273.9  |
| 89 | U | 7958 | 3.56 | 6609.9  | 51.2  | 7956 | 1.55 | 117.3  | 10.4 | 6492.6  |
| 90 | U | 7942 | 3.48 | 6477.5  | 89.9  | 7939 | 1.55 | 254.4  | 9.9  | 6223.1  |
| 91 | C | 7926 | 3.05 | 4293.0  | 55.5  | 7924 | 1.95 | 658.9  | 14.2 | 3634.1  |
| 92 | U | 7910 | 3.05 | 3413.5  | 51.4  | 7907 | 1.79 | 417.3  | 11.9 | 2996.2  |
| 93 | C | 7894 | 3.58 | 6577.4  | 121.9 | 7891 | 2.21 | 851.1  | 35.1 | 5726.3  |
| 94 | A | 7877 | 4.00 | 14819.1 | 70.3  | 7874 | 3.51 | 2500.4 | 38.8 | 12318.7 |
| 95 | U | 7862 | 4.05 | 11733.1 | 110.9 | 7859 | 3.75 | 2731.4 | 27.5 | 9001.7  |
| 96 | G | 7848 | 4.15 | 3075.6  | 83.5  | 7844 | 2.64 | 429.1  | 20.3 | 2646.5  |

|     |   |      |      |         |       |      |      |        |      |         |
|-----|---|------|------|---------|-------|------|------|--------|------|---------|
| 97  | G | 7832 | 3.05 | 1579.0  | 43.6  | 7828 | 1.55 | 170.6  | 19.2 | 1408.4  |
| 98  | U | 7816 | 3.36 | 5970.7  | 88.7  | 7814 | 3.44 | 2045.7 | 23.9 | 3924.9  |
| 99  | A | 7799 | 3.56 | 5188.6  | 158.7 | 7795 | 3.49 | 1740.0 | 22.1 | 3448.6  |
| 100 | G | 7785 | 3.36 | 0.0     | 129.0 | 7782 | 2.49 | 0.0    | 18.5 | 0.0     |
| 101 | C | 7772 | 3.91 | 4375.4  | 33.1  | 7769 | 3.30 | 953.2  | 22.7 | 3422.3  |
| 102 | G | 7759 | 3.46 | 3789.8  | 57.1  | 7757 | 2.49 | 186.2  | 18.6 | 3603.7  |
| 103 | C | 7742 | 3.36 | 4427.3  | 56.9  | 7740 | 2.97 | 1104.9 | 30.8 | 3322.4  |
| 104 | C | 7727 | 3.60 | 9600.2  | 65.1  | 7724 | 3.35 | 2415.0 | 36.9 | 7185.2  |
| 105 | U | 7711 | 3.36 | 3156.7  | 76.2  | 7708 | 2.49 | 526.3  | 21.8 | 2630.4  |
| 106 | G | 7697 | 3.36 | 1766.1  | 97.7  | 7693 | 4.39 | 34.3   | 30.9 | 1731.7  |
| 107 | U | 7682 | 3.98 | 14625.7 | 49.5  | 7679 | 4.06 | 3912.1 | 37.7 | 10713.6 |
| 108 | G | 7668 | 3.96 | 7173.1  | 40.3  | 7665 | 3.76 | 2087.4 | 29.8 | 5085.8  |
| 109 | C | 7653 | 3.66 | 7375.4  | 64.4  | 7651 | 3.92 | 2661.8 | 36.5 | 4713.6  |
| 110 | U | 7638 | 3.83 | 9887.9  | 71.1  | 7635 | 4.06 | 3380.0 | 29.8 | 6507.9  |
| 111 | U | 7623 | 3.91 | 13706.7 | 71.9  | 7620 | 4.15 | 3374.1 | 32.4 | 10332.6 |
| 112 | C | 7606 | 3.98 | 16937.0 | 117.1 | 7603 | 4.11 | 5473.8 | 30.7 | 11463.2 |
| 113 | G | 7592 | 4.11 | 6415.3  | 65.9  | 7589 | 3.90 | 1788.2 | 19.5 | 4627.1  |
| 114 | G | 7576 | 4.21 | 3609.3  | 83.6  | 7573 | 4.20 | 1329.8 | 21.8 | 2279.5  |
| 115 | U | 7561 | 4.11 | 17259.9 | 116.6 | 7559 | 4.39 | 4983.0 | 32.5 | 12277.0 |
| 116 | U | 7547 | 4.07 | 21696.1 | 89.5  | 7545 | 4.34 | 6474.4 | 43.7 | 15221.7 |
| 117 | A | 7533 | 4.21 | 734.9   | 66.4  | 7531 | 4.39 | 29.6   | 37.6 | 705.3   |
| 118 | C | 7518 | 3.39 | 2666.7  | 40.6  | 7516 | 4.06 | 1148.7 | 18.0 | 1518.0  |
| 119 | U | 7505 | 3.76 | 6554.5  | 45.5  | 7502 | 3.92 | 2362.3 | 26.9 | 4192.2  |
| 120 | U | 7490 | 3.50 | 2391.8  | 51.1  | 7487 | 2.49 | 480.1  | 15.8 | 1911.7  |
| 121 | C | 7474 | 3.02 | 1180.0  | 52.1  | 7470 | 2.43 | 55.7   | 15.7 | 1124.4  |
| 122 | U | 7458 | 3.75 | 8869.4  | 44.9  | 7456 | 4.38 | 2281.0 | 34.6 | 6588.4  |
| 123 | A | 7443 | 4.26 | 20598.4 | 149.0 | 7440 | 4.28 | 4450.3 | 39.7 | 16148.0 |
| 124 | A | 7427 | 4.14 | 30218.3 | 144.8 | 7425 | 4.00 | 3453.2 | 30.3 | 26765.1 |
| 125 | G | 7414 | 3.98 | 9654.6  | 75.8  | 7411 | 4.23 | 715.3  | 33.3 | 8939.3  |
| 126 | G | 7401 | 4.09 | 11188.4 | 91.5  | 7398 | 3.81 | 3266.9 | 45.7 | 7921.4  |
| 127 | A | 7386 | 3.83 | 4649.4  | 105.4 | 7384 | 2.81 | 888.7  | 22.9 | 3760.8  |
| 128 | A | 7372 | 3.04 | 1880.7  | 98.2  | 7369 | 4.58 | 226.3  | 35.3 | 1654.4  |
| 129 | G | 7358 | 4.14 | 11697.9 | 82.4  | 7355 | 4.00 | 3695.8 | 36.2 | 8002.1  |
| 130 | U | 7343 | 3.52 | 2794.7  | 83.9  | 7341 | 2.43 | 279.8  | 15.3 | 2514.9  |
| 131 | C | 7328 | 2.86 | 1510.8  | 41.5  | 7324 | 2.43 | 55.2   | 11.3 | 1455.6  |
| 132 | C | 7313 | 3.26 | 5115.4  | 50.6  | 7310 | 2.83 | 1320.1 | 17.5 | 3795.3  |
| 133 | A | 7297 | 2.86 | 1947.1  | 62.8  | 7296 | 2.43 | 26.3   | 17.7 | 1920.7  |
| 134 | C | 7281 | 3.16 | 6090.6  | 86.9  | 7279 | 2.58 | 1444.9 | 17.0 | 4645.7  |
| 135 | A | 7266 | 2.86 | 2596.1  | 55.0  | 7263 | 2.43 | 123.2  | 16.6 | 2472.9  |
| 136 | C | 7251 | 3.22 | 6191.6  | 102.2 | 7248 | 2.43 | 1090.3 | 15.5 | 5101.3  |
| 137 | A | 7236 | 3.50 | 8588.7  | 63.5  | 7233 | 2.59 | 757.9  | 36.0 | 7830.8  |
| 138 | A | 7221 | 4.01 | 18145.1 | 154.9 | 7218 | 3.66 | 3506.3 | 25.0 | 14638.7 |
| 139 | A | 7205 | 4.01 | 24641.0 | 160.3 | 7203 | 3.66 | 4121.4 | 31.7 | 20519.6 |
| 140 | U | 7190 | 3.48 | 8794.2  | 84.7  | 7187 | 2.43 | 1062.4 | 37.2 | 7731.8  |
| 141 | C | 7175 | 4.01 | 17326.7 | 109.7 | 7173 | 4.33 | 4880.6 | 54.1 | 12446.1 |
| 142 | A | 7160 | 4.01 | 33115.5 | 77.3  | 7158 | 4.19 | 7754.4 | 39.2 | 25361.1 |
| 143 | A | 7145 | 3.86 | 18936.0 | 97.3  | 7143 | 3.09 | 2213.6 | 43.5 | 16722.4 |
| 144 | G | 7131 | 3.18 | 4930.5  | 90.4  | 7128 | 1.95 | 34.0   | 11.3 | 4896.6  |

|     |   |      |      |         |       |      |      |        |      |         |
|-----|---|------|------|---------|-------|------|------|--------|------|---------|
| 145 | A | 7115 | 3.27 | 4466.3  | 89.7  | 7111 | 1.95 | 41.3   | 15.4 | 4425.0  |
| 146 | U | 7100 | 3.45 | 8194.7  | 89.8  | 7098 | 2.95 | 1692.1 | 21.3 | 6502.5  |
| 147 | C | 7086 | 3.06 | 4719.8  | 50.2  | 7083 | 2.62 | 929.6  | 25.8 | 3790.3  |
| 148 | C | 7071 | 3.30 | 6736.7  | 34.1  | 7069 | 2.70 | 1500.6 | 28.4 | 5236.1  |
| 149 | G | 7057 | 3.66 | 4680.1  | 80.7  | 7054 | 3.95 | 592.4  | 46.2 | 4087.7  |
| 150 | U | 7043 | 3.75 | 18619.8 | 58.6  | 7040 | 3.75 | 3847.1 | 63.7 | 14772.6 |
| 151 | U | 7029 | 3.70 | 14737.4 | 93.6  | 7026 | 2.57 | 1054.5 | 36.1 | 13682.9 |
| 152 | A | 7014 | 3.42 | 10391.1 | 104.0 | 7012 | 3.56 | 26.9   | 37.8 | 10364.1 |
| 153 | G | 7001 | 3.75 | 23092.2 | 188.5 | 6998 | 3.30 | 3347.8 | 43.2 | 19744.5 |
| 154 | A | 6986 | 3.66 | 14053.4 | 223.0 | 6984 | 1.95 | 317.7  | 25.5 | 13735.8 |
| 155 | C | 6970 | 3.18 | 9833.9  | 61.3  | 6967 | 2.57 | 1816.2 | 32.4 | 8017.6  |
| 156 | G | 6957 | 2.90 | 3478.0  | 84.7  | 6954 | 1.95 | 213.2  | 17.6 | 3264.9  |
| 157 | U | 6943 | 2.90 | 4136.0  | 99.1  | 6940 | 1.95 | 0.0    | 13.6 | 4136.0  |
| 158 | U | 6929 | 3.25 | 8258.9  | 71.1  | 6926 | 2.81 | 1684.6 | 24.6 | 6574.3  |
| 159 | U | 6915 | 2.90 | 962.0   | 137.0 | 6911 | 4.15 | 166.9  | 51.0 | 795.2   |
| 160 | C | 6899 | 3.71 | 17279.0 | 115.5 | 6897 | 3.90 | 4947.6 | 42.3 | 12331.5 |
| 161 | A | 6885 | 3.57 | 12446.6 | 80.0  | 6883 | 3.39 | 2598.5 | 25.0 | 9848.1  |
| 162 | G | 6871 | 2.90 | 710.5   | 40.4  | 6868 | 1.95 | 22.0   | 14.3 | 688.5   |
| 163 | C | 6857 | 2.90 | 1271.4  | 26.6  | 6858 | 1.95 | 27.1   | 5.5  | 1244.3  |
| 164 | U | 6844 | 3.26 | 2590.9  | 35.3  | 6842 | 1.95 | 293.2  | 8.8  | 2297.7  |
| 165 | U | 6830 | 3.25 | 3065.5  | 36.2  | 6828 | 1.95 | 70.9   | 9.7  | 2994.6  |
| 166 | C | 6814 | 3.16 | 4028.0  | 49.9  | 6811 | 1.95 | 648.4  | 27.7 | 3379.6  |
| 167 | C | 6799 | 3.40 | 7238.2  | 36.4  | 6797 | 3.05 | 2069.3 | 31.6 | 5169.0  |
| 168 | A | 6785 | 3.36 | 6841.7  | 37.6  | 6782 | 2.65 | 1331.8 | 43.5 | 5510.0  |
| 169 | A | 6771 | 3.55 | 7448.2  | 83.3  | 6769 | 2.65 | 1391.8 | 37.7 | 6056.4  |
| 170 | A | 6756 | 3.75 | 14285.7 | 40.1  | 6753 | 2.92 | 1285.3 | 24.5 | 13000.5 |
| 171 | A | 6741 | 3.73 | 20219.2 | 47.5  | 6738 | 3.44 | 2356.4 | 33.1 | 17862.8 |
| 172 | C | 6725 | 3.62 | 14092.3 | 47.8  | 6722 | 3.48 | 3586.8 | 36.0 | 10505.5 |
| 173 | A | 6710 | 3.68 | 11103.5 | 37.5  | 6707 | 3.68 | 2081.6 | 35.0 | 9021.9  |
| 174 | G | 6697 | 3.73 | 13009.3 | 40.0  | 6694 | 3.88 | 3442.1 | 33.2 | 9567.2  |
| 175 | A | 6682 | 3.71 | 14431.7 | 74.2  | 6679 | 3.68 | 3140.3 | 48.8 | 11291.4 |
| 176 | A | 6667 | 3.67 | 15640.1 | 144.5 | 6665 | 3.22 | 2294.1 | 31.8 | 13346.0 |
| 177 | G | 6654 | 2.50 | 1212.2  | 91.9  | 6651 | 2.65 | 273.8  | 22.9 | 938.5   |
| 178 | A | 6640 | 2.95 | 6303.5  | 92.2  | 6637 | 3.13 | 2028.3 | 29.4 | 4275.2  |
| 179 | A | 6625 | 2.84 | 4040.5  | 78.6  | 6622 | 2.74 | 1354.2 | 28.9 | 2686.3  |
| 180 | U | 6610 | 3.08 | 4364.2  | 46.6  | 6607 | 3.13 | 1677.6 | 23.4 | 2686.6  |
| 181 | G | 6598 | 2.50 | 342.2   | 59.7  | 6593 | 3.91 | 111.5  | 37.7 | 230.7   |
| 182 | U | 6583 | 3.65 | 9143.7  | 130.7 | 6580 | 3.72 | 3997.7 | 34.6 | 5146.1  |
| 183 | G | 6570 | 3.71 | 7654.1  | 98.6  | 6568 | 3.68 | 2840.0 | 30.3 | 4814.2  |
| 184 | A | 6555 | 3.17 | 3704.4  | 46.2  | 6552 | 3.34 | 1448.1 | 33.7 | 2256.3  |
| 185 | G | 6542 | 3.57 | 8782.2  | 57.5  | 6540 | 3.72 | 3186.4 | 45.2 | 5595.8  |
| 186 | A | 6527 | 3.68 | 7532.7  | 57.2  | 6524 | 3.67 | 1581.0 | 46.2 | 5951.7  |
| 187 | A | 6512 | 3.57 | 10206.1 | 78.7  | 6510 | 3.44 | 2297.5 | 28.9 | 7908.6  |
| 188 | G | 6500 | 3.53 | 4621.8  | 49.8  | 6498 | 3.77 | 1894.6 | 29.1 | 2727.2  |
| 189 | G | 6488 | 2.50 | 1504.5  | 37.7  | 6485 | 2.99 | 543.4  | 26.2 | 961.0   |
| 190 | C | 6473 | 5.53 | 583.4   | 204.7 | 6471 | 2.99 | 152.3  | 16.4 | 431.1   |
| 191 | U | 6456 | 5.53 | 4025.7  | 348.2 | 6458 | 3.68 | 2228.8 | 14.3 | 1796.9  |
| 192 | U | 6445 | 1.98 | 11.9    | 32.8  | 6443 | 2.99 | 29.2   | 11.0 | -17.3   |

|     |   |      |      |         |       |      |      |        |      |         |
|-----|---|------|------|---------|-------|------|------|--------|------|---------|
| 193 | C | 6435 | 3.88 | 1996.8  | 94.1  | 6430 | 3.88 | 965.1  | 24.8 | 1031.7  |
| 194 | C | 6418 | 3.59 | 13841.6 | 83.1  | 6416 | 3.84 | 5687.6 | 30.4 | 8154.0  |
| 195 | A | 6403 | 3.55 | 9773.3  | 60.4  | 6401 | 3.93 | 3402.9 | 39.8 | 6370.4  |
| 196 | C | 6388 | 3.60 | 9291.9  | 62.6  | 6385 | 3.80 | 2983.6 | 58.3 | 6308.3  |
| 197 | U | 6374 | 3.55 | 10615.4 | 61.5  | 6372 | 3.56 | 3395.5 | 30.2 | 7219.9  |
| 198 | A | 6360 | 3.34 | 4933.0  | 54.5  | 6357 | 3.38 | 925.5  | 33.5 | 4007.5  |
| 199 | A | 6345 | 3.42 | 10769.5 | 60.2  | 6343 | 3.80 | 4151.8 | 44.9 | 6617.7  |
| 200 | G | 6333 | 3.55 | 6230.2  | 48.5  | 6330 | 3.80 | 3091.7 | 38.1 | 3138.5  |
| 201 | G | 6321 | 3.60 | 10036.8 | 44.0  | 6319 | 3.61 | 4692.4 | 34.6 | 5344.4  |
| 202 | C | 6307 | 1.98 | 23.6    | 41.9  | 6305 | 3.99 | 17.9   | 42.2 | 5.7     |
| 203 | U | 6294 | 3.60 | 13674.2 | 50.9  | 6291 | 3.80 | 4955.9 | 62.8 | 8718.3  |
| 204 | A | 6281 | 3.55 | 10440.5 | 51.2  | 6279 | 2.99 | 1315.1 | 42.2 | 9125.4  |
| 205 | A | 6267 | 3.37 | 13001.0 | 59.5  | 6265 | 2.99 | 1656.2 | 32.7 | 11344.8 |
| 206 | C | 6252 | 3.16 | 7619.7  | 142.9 | 6250 | 2.99 | 1645.3 | 30.8 | 5974.4  |
| 207 | U | 6239 | 1.98 | 1120.7  | 91.1  | 6236 | 2.99 | 373.5  | 36.5 | 747.2   |
| 208 | C | 6225 | 2.99 | 8898.5  | 76.5  | 6223 | 3.54 | 3926.7 | 36.2 | 4971.9  |
| 209 | U | 6212 | 2.81 | 3531.0  | 84.8  | 6209 | 3.61 | 1186.5 | 27.2 | 2344.5  |
| 210 | C | 6197 | 3.00 | 9560.1  | 129.5 | 6195 | 3.69 | 3316.0 | 21.7 | 6244.1  |
| 211 | A | 6184 | 2.95 | 9029.9  | 119.9 | 6181 | 3.19 | 2356.5 | 45.2 | 6673.5  |
| 212 | A | 6169 | 2.76 | 7686.0  | 171.1 | 6167 | 3.23 | 1856.0 | 39.4 | 5830.0  |
| 213 | C | 6155 | 2.80 | 7998.3  | 190.4 | 6152 | 3.29 | 2874.9 | 32.0 | 5123.4  |
| 214 | A | 6141 | 3.35 | 11551.2 | 77.4  | 6138 | 3.29 | 1953.4 | 32.8 | 9597.8  |
| 215 | G | 6129 | 3.27 | 17799.9 | 134.0 | 6127 | 3.23 | 3327.0 | 35.5 | 14472.9 |
| 216 | A | 6116 | 2.80 | 6588.6  | 115.4 | 6112 | 2.07 | 0.1    | 34.5 | 6588.5  |
| 217 | C | 6101 | 3.32 | 13030.0 | 198.4 | 6098 | 3.56 | 3731.7 | 35.0 | 9298.3  |
| 218 | A | 6087 | 3.50 | 30729.4 | 214.3 | 6085 | 3.47 | 6874.7 | 50.0 | 23854.7 |
| 219 | A | 6073 | 2.80 | 6484.2  | 120.9 | 6070 | 3.69 | 140.8  | 82.4 | 6343.4  |
| 220 | C | 6059 | 3.27 | 21334.1 | 169.1 | 6056 | 3.69 | 7514.9 | 79.7 | 13819.2 |
| 221 | A | 6046 | 3.41 | 23078.0 | 247.7 | 6043 | 3.22 | 4277.5 | 51.7 | 18800.6 |
| 222 | A | 6032 | 3.06 | 4189.5  | 209.9 | 6030 | 2.07 | 0.0    | 34.1 | 4189.5  |
| 223 | C | 6018 | 3.09 | 12902.3 | 107.5 | 6016 | 2.87 | 3706.4 | 41.8 | 9195.8  |
| 224 | A | 6004 | 3.09 | 12090.5 | 94.1  | 6001 | 2.07 | 1273.0 | 45.9 | 10817.4 |
| 225 | C | 5988 | 2.80 | 4604.6  | 157.1 | 5985 | 2.07 | 340.9  | 53.7 | 4263.8  |
| 226 | C | 5973 | 3.55 | 18525.5 | 138.9 | 5971 | 3.45 | 5791.0 | 69.5 | 12734.5 |
| 227 | U | 5961 | 3.74 | 20466.1 | 167.6 | 5958 | 3.38 | 4523.1 | 75.3 | 15943.1 |
| 228 | G | 5950 | 3.77 | 3371.2  | 247.5 | 5947 | 2.07 | 0.0    | 33.5 | 3371.2  |
| 229 | C | 5938 | 3.32 | 9792.3  | 118.4 | 5935 | 2.07 | 908.2  | 30.7 | 8884.1  |
| 230 | U | 5925 | 3.41 | 24317.2 | 165.8 | 5923 | 2.50 | 2697.9 | 42.7 | 21619.3 |
| 231 | U | 5913 | 3.29 | 13509.1 | 120.5 | 5910 | 2.07 | 459.5  | 42.8 | 13049.6 |
| 232 | C | 5898 | 3.09 | 12417.0 | 173.6 | 5896 | 2.07 | 1646.0 | 33.3 | 10771.0 |
| 233 | A | 5884 | 3.03 | 12868.4 | 183.0 | 5881 | 2.07 | 1018.5 | 34.2 | 11849.9 |
| 234 | U | 5870 | 3.09 | 12847.0 | 156.3 | 5867 | 2.07 | 740.7  | 38.3 | 12106.3 |
| 235 | C | 5855 | 2.91 | 11236.7 | 125.8 | 5852 | 2.38 | 2488.3 | 37.7 | 8748.4  |
| 236 | A | 5839 | 3.06 | 10827.0 | 128.5 | 5837 | 2.64 | 1789.7 | 49.9 | 9037.2  |
| 237 | G | 5826 | 3.09 | 11884.2 | 137.8 | 5824 | 2.88 | 3261.0 | 45.1 | 8623.3  |
| 238 | C | 5814 | 2.82 | 5927.7  | 112.6 | 5812 | 2.53 | 1756.4 | 34.8 | 4171.3  |
| 239 | U | 5802 | 2.66 | 1663.7  | 92.3  | 5798 | 2.02 | 1.3    | 16.1 | 1662.4  |
| 240 | G | 5792 | 2.49 | 2039.7  | 72.7  | 5790 | 2.02 | 303.7  | 14.7 | 1736.0  |

|     |   |      |      |         |       |      |      |        |      |         |
|-----|---|------|------|---------|-------|------|------|--------|------|---------|
| 241 | U | 5780 | 2.62 | 4503.8  | 97.9  | 5777 | 2.02 | 793.5  | 17.4 | 3710.3  |
| 242 | U | 5766 | 2.62 | 4575.5  | 100.9 | 5763 | 2.09 | 465.1  | 29.2 | 4110.4  |
| 243 | C | 5752 | 2.93 | 10030.8 | 146.5 | 5749 | 2.91 | 2046.0 | 44.0 | 7984.8  |
| 244 | C | 5737 | 3.20 | 15039.2 | 155.8 | 5734 | 3.77 | 4895.6 | 52.1 | 10143.6 |
| 245 | A | 5724 | 3.39 | 24172.5 | 266.5 | 5720 | 3.57 | 6545.2 | 97.7 | 17627.3 |
| 246 | G | 5713 | 3.58 | 22463.9 | 170.7 | 5710 | 3.26 | 7086.2 | 57.9 | 15377.7 |
| 247 | A | 5700 | 3.48 | 7816.5  | 145.4 | 5698 | 3.42 | 2058.5 | 30.1 | 5758.0  |
| 248 | G | 5690 | 3.20 | 9022.0  | 93.0  | 5687 | 3.40 | 1641.5 | 20.4 | 7380.5  |
| 249 | A | 5678 | 3.29 | 16400.5 | 90.0  | 5675 | 3.04 | 2608.9 | 47.7 | 13791.6 |
| 250 | A | 5665 | 2.51 | 2240.4  | 78.1  | 5662 | 2.02 | 50.5   | 12.5 | 2189.9  |
| 251 | C | 5650 | 2.76 | 4526.3  | 69.8  | 5648 | 2.24 | 961.3  | 26.6 | 3565.0  |
| 252 | C | 5636 | 2.80 | 4146.4  | 76.2  | 5633 | 3.14 | 1829.3 | 33.2 | 2317.0  |
| 253 | C | 5622 | 3.18 | 8395.7  | 92.0  | 5619 | 3.37 | 3976.2 | 32.3 | 4419.5  |
| 254 | C | 5608 | 3.15 | 6371.2  | 85.3  | 5605 | 3.42 | 2135.2 | 25.4 | 4236.0  |
| 255 | C | 5594 | 3.05 | 9981.6  | 71.1  | 5591 | 3.22 | 4295.6 | 41.1 | 5686.0  |
| 256 | A | 5580 | 3.00 | 7034.1  | 86.8  | 5578 | 2.92 | 2541.6 | 31.8 | 4492.6  |
| 257 | U | 5568 | 2.49 | 1627.4  | 78.2  | 5565 | 2.08 | 441.7  | 34.2 | 1185.7  |
| 258 | C | 5554 | 2.88 | 7118.6  | 72.0  | 5552 | 2.82 | 2646.1 | 35.3 | 4472.5  |
| 259 | A | 5541 | 2.48 | 1510.8  | 75.0  | 5539 | 2.43 | 158.9  | 37.6 | 1351.9  |
| 260 | U | 5530 | 3.38 | 8687.2  | 100.8 | 5527 | 3.23 | 3002.9 | 31.2 | 5684.3  |
| 261 | G | 5518 | 3.48 | 2519.6  | 86.4  | 5517 | 2.43 | 605.0  | 24.7 | 1914.6  |
| 262 | C | 5504 | 3.23 | 9259.1  | 129.0 | 5502 | 3.37 | 3129.2 | 31.1 | 6130.0  |
| 263 | C | 5492 | 3.18 | 13496.4 | 94.5  | 5489 | 3.16 | 3405.9 | 45.1 | 10090.5 |
| 264 | U | 5480 | 2.48 | 699.6   | 63.1  | 5476 | 2.43 | 78.9   | 27.5 | 620.7   |
| 265 | C | 5466 | 3.18 | 7291.2  | 78.5  | 5464 | 3.12 | 2858.6 | 26.8 | 4432.7  |
| 266 | U | 5454 | 2.55 | 2804.8  | 73.0  | 5452 | 2.43 | 702.5  | 32.1 | 2102.4  |
| 267 | C | 5440 | 3.05 | 4558.9  | 99.9  | 5438 | 3.02 | 1730.1 | 45.9 | 2828.8  |
| 268 | C | 5426 | 3.18 | 14244.9 | 96.6  | 5424 | 3.37 | 5586.9 | 45.8 | 8657.9  |
| 269 | U | 5414 | 3.11 | 4399.8  | 58.3  | 5411 | 3.42 | 1715.3 | 30.7 | 2684.5  |
| 270 | C | 5401 | 3.34 | 6452.9  | 42.6  | 5398 | 3.37 | 2295.7 | 38.7 | 4157.2  |
| 271 | A | 5388 | 3.29 | 16870.9 | 80.3  | 5386 | 3.28 | 3399.5 | 41.3 | 13471.3 |
| 272 | A | 5375 | 3.28 | 20515.7 | 92.3  | 5372 | 2.80 | 2192.4 | 52.6 | 18323.4 |
| 273 | C | 5361 | 2.62 | 3805.9  | 70.8  | 5358 | 2.43 | 681.5  | 36.5 | 3124.3  |
| 274 | C | 5347 | 3.34 | 6601.1  | 99.0  | 5344 | 3.15 | 2822.5 | 43.6 | 3778.6  |
| 275 | U | 5335 | 3.23 | 16179.5 | 176.3 | 5333 | 3.24 | 6565.7 | 44.4 | 9613.8  |
| 276 | G | 5324 | 2.51 | 3442.8  | 93.1  | 5322 | 3.07 | 1312.3 | 40.5 | 2130.5  |
| 277 | C | 5311 | 2.48 | 3313.6  | 41.2  | 5308 | 2.43 | 1123.5 | 25.9 | 2190.1  |
| 278 | U | 5298 | 2.48 | 1749.3  | 89.1  | 5295 | 2.43 | 137.9  | 35.5 | 1611.4  |
| 279 | U | 5286 | 3.19 | 11096.3 | 96.6  | 5283 | 3.38 | 2930.2 | 30.3 | 8166.1  |
| 280 | C | 5272 | 3.29 | 14921.1 | 79.7  | 5269 | 3.24 | 5091.4 | 52.2 | 9829.6  |
| 281 | A | 5259 | 3.10 | 4679.9  | 65.9  | 5256 | 2.43 | 1270.0 | 36.0 | 3409.9  |
| 282 | G | 5249 | 3.16 | 3124.6  | 48.3  | 5246 | 2.62 | 706.1  | 24.2 | 2418.4  |
| 283 | U | 5238 | 3.03 | 7156.8  | 89.9  | 5236 | 2.73 | 2128.1 | 36.3 | 5028.7  |
| 284 | A | 5226 | 2.73 | 2471.9  | 50.2  | 5223 | 2.45 | 228.4  | 27.7 | 2243.6  |
| 285 | C | 5213 | 2.73 | 2457.5  | 112.9 | 5209 | 2.45 | 585.5  | 34.0 | 1871.9  |
| 286 | C | 5199 | 3.28 | 18395.7 | 167.8 | 5197 | 3.14 | 5803.5 | 43.7 | 12592.1 |
| 287 | A | 5187 | 2.73 | 3971.8  | 86.7  | 5185 | 2.45 | 617.5  | 37.8 | 3354.2  |
| 288 | C | 5173 | 2.73 | 1031.6  | 61.8  | 5170 | 2.45 | 259.2  | 23.7 | 772.4   |

|     |   |      |      |         |       |      |      |        |       |         |
|-----|---|------|------|---------|-------|------|------|--------|-------|---------|
| 289 | C | 5159 | 3.08 | 7531.6  | 57.5  | 5156 | 3.00 | 2329.7 | 33.2  | 5201.9  |
| 290 | U | 5147 | 2.92 | 3345.6  | 60.3  | 5144 | 2.45 | 766.6  | 24.6  | 2579.0  |
| 291 | C | 5135 | 3.28 | 7749.4  | 58.6  | 5132 | 3.48 | 2056.5 | 37.8  | 5692.8  |
| 292 | C | 5121 | 3.16 | 13219.0 | 89.4  | 5118 | 3.28 | 4757.9 | 62.0  | 8461.1  |
| 293 | A | 5108 | 3.25 | 8127.3  | 119.5 | 5105 | 3.20 | 2571.2 | 64.6  | 5556.1  |
| 294 | C | 5093 | 3.53 | 15458.9 | 44.2  | 5090 | 3.76 | 5312.7 | 37.8  | 10146.2 |
| 295 | A | 5080 | 3.48 | 34142.7 | 112.7 | 5077 | 3.62 | 8589.1 | 107.0 | 25553.6 |
| 296 | G | 5068 | 3.31 | 15120.2 | 165.6 | 5065 | 2.91 | 2309.3 | 52.0  | 12810.9 |
| 297 | A | 5054 | 3.35 | 23807.5 | 253.7 | 5051 | 3.53 | 3950.9 | 28.3  | 19856.6 |
| 298 | A | 5040 | 3.53 | 21500.9 | 296.0 | 5036 | 3.33 | 3701.5 | 51.6  | 17799.4 |
| 299 | U | 5028 | 3.68 | 14600.5 | 202.4 | 5025 | 2.67 | 1453.0 | 32.0  | 13147.5 |
| 300 | G | 5018 | 2.73 | 3733.8  | 106.9 | 5015 | 2.58 | 905.7  | 25.9  | 2828.1  |
| 301 | G | 5008 | 3.58 | 4600.3  | 153.3 | 5005 | 2.96 | 1605.7 | 77.3  | 2994.6  |
| 302 | G | 4997 | 3.35 | 17671.4 | 277.0 | 4995 | 3.33 | 6414.4 | 58.1  | 11257.0 |
| 303 | C | 4984 | 3.07 | 9171.8  | 142.3 | 4982 | 3.19 | 3173.3 | 47.7  | 5998.5  |
| 304 | C | 4972 | 3.09 | 3250.9  | 68.4  | 4969 | 2.45 | 827.1  | 31.3  | 2423.8  |
| 305 | G | 4962 | 2.88 | 1694.0  | 53.0  | 4959 | 2.03 | 194.2  | 16.9  | 1499.8  |
| 306 | U | 4950 | 2.68 | 2007.1  | 55.0  | 4947 | 2.03 | 312.7  | 20.1  | 1694.4  |
| 307 | A | 4936 | 2.68 | 4541.9  | 56.7  | 4933 | 2.03 | 1156.4 | 20.9  | 3385.5  |
| 308 | C | 4921 | 2.68 | 1707.9  | 53.2  | 4918 | 2.03 | 314.2  | 15.4  | 1393.6  |
| 309 | C | 4908 | 3.43 | 4440.6  | 95.0  | 4906 | 2.94 | 1629.7 | 64.4  | 2810.9  |
| 310 | C | 4897 | 3.16 | 12165.1 | 203.6 | 4895 | 3.22 | 5013.9 | 67.0  | 7151.2  |
| 311 | A | 4884 | 2.95 | 8557.0  | 137.0 | 4881 | 3.02 | 2831.2 | 45.9  | 5725.8  |
| 312 | C | 4871 | 3.30 | 15312.7 | 173.0 | 4868 | 3.22 | 5444.4 | 44.6  | 9868.3  |
| 313 | A | 4858 | 3.53 | 4591.6  | 77.3  | 4855 | 2.77 | 1182.6 | 39.3  | 3409.0  |
| 314 | G | 4847 | 2.68 | 963.7   | 95.8  | 4845 | 2.03 | 64.4   | 13.1  | 899.3   |
| 315 | C | 4836 | 2.68 | 4437.6  | 60.5  | 4833 | 2.47 | 1795.8 | 42.0  | 2641.8  |
| 316 | A | 4823 | 3.30 | 6291.7  | 144.1 | 4819 | 3.18 | 2499.1 | 47.5  | 3792.6  |
| 317 | G | 4812 | 3.16 | 17199.6 | 240.9 | 4809 | 3.22 | 5646.5 | 58.9  | 11553.1 |
| 318 | U | 4801 | 3.16 | 28293.6 | 258.3 | 4798 | 3.22 | 5803.7 | 59.1  | 22489.9 |
| 319 | G | 4789 | 3.30 | 2972.1  | 145.9 | 4786 | 2.13 | 904.6  | 43.1  | 2067.5  |
| 320 | C | 4776 | 2.68 | 6134.4  | 104.0 | 4773 | 2.78 | 2626.9 | 38.5  | 3507.5  |
| 321 | A | 4763 | 2.68 | 4864.1  | 74.9  | 4760 | 2.61 | 1787.6 | 26.1  | 3076.4  |
| 322 | U | 4752 | 3.03 | 5699.7  | 136.9 | 4749 | 3.14 | 2617.5 | 60.5  | 3082.2  |
| 323 | G | 4742 | 3.03 | 10809.2 | 117.8 | 4739 | 3.25 | 4579.8 | 46.7  | 6229.4  |
| 324 | A | 4731 | 2.68 | 2004.6  | 56.6  | 4727 | 2.15 | 718.1  | 36.2  | 1286.5  |
| 325 | U | 4720 | 2.98 | 286.3   | 42.1  | 4717 | 2.03 | 75.0   | 17.5  | 211.4   |
| 326 | G | 4710 | 2.77 | 3416.7  | 55.2  | 4707 | 3.30 | 1168.4 | 28.3  | 2248.3  |
| 327 | A | 4699 | 2.95 | 11367.0 | 138.4 | 4695 | 2.59 | 2306.3 | 50.0  | 9060.7  |
| 328 | C | 4685 | 3.01 | 9515.1  | 117.7 | 4682 | 3.14 | 3608.8 | 74.7  | 5906.3  |
| 329 | C | 4671 | 3.27 | 16663.0 | 168.9 | 4668 | 3.55 | 6786.9 | 45.3  | 9876.1  |
| 330 | C | 4658 | 3.20 | 20815.6 | 264.4 | 4655 | 3.28 | 7472.5 | 115.6 | 13343.2 |
| 331 | A | 4647 | 2.81 | 11764.2 | 186.7 | 4644 | 2.60 | 1826.5 | 51.2  | 9937.7  |
| 332 | A | 4636 | 3.05 | 16829.2 | 210.5 | 4632 | 3.00 | 2433.1 | 55.1  | 14396.1 |
| 333 | A | 4624 | 3.05 | 20657.6 | 188.5 | 4621 | 2.62 | 2379.0 | 38.0  | 18278.6 |
| 334 | A | 4612 | 2.74 | 9596.6  | 146.3 | 4608 | 2.05 | 747.7  | 35.3  | 8848.9  |
| 335 | C | 4598 | 2.65 | 4759.6  | 129.9 | 4594 | 2.60 | 1157.7 | 46.7  | 3602.0  |
| 336 | C | 4586 | 3.08 | 16237.2 | 176.2 | 4583 | 3.00 | 5852.5 | 47.5  | 10384.7 |

|     |   |      |      |         |       |      |      |         |       |         |
|-----|---|------|------|---------|-------|------|------|---------|-------|---------|
| 337 | A | 4574 | 3.05 | 18841.9 | 219.3 | 4571 | 2.77 | 3216.6  | 60.9  | 15625.2 |
| 338 | A | 4562 | 2.99 | 12332.3 | 159.6 | 4559 | 2.05 | 1264.6  | 38.2  | 11067.7 |
| 339 | G | 4551 | 2.89 | 6704.5  | 116.3 | 4547 | 2.05 | 0.2     | 38.6  | 6704.3  |
| 340 | C | 4539 | 2.65 | 7708.4  | 81.5  | 4535 | 2.53 | 2642.4  | 49.4  | 5066.0  |
| 341 | C | 4527 | 2.65 | 6254.9  | 83.8  | 4523 | 2.25 | 1748.1  | 38.5  | 4506.9  |
| 342 | A | 4515 | 2.65 | 5671.7  | 86.4  | 4512 | 2.05 | 1013.9  | 31.4  | 4657.9  |
| 343 | A | 4502 | 2.65 | 5952.9  | 102.5 | 4498 | 2.32 | 914.3   | 33.3  | 5038.6  |
| 344 | U | 4491 | 2.65 | 9506.9  | 113.4 | 4487 | 2.45 | 1474.0  | 33.2  | 8032.9  |
| 345 | C | 4480 | 2.65 | 2090.8  | 154.9 | 4475 | 3.15 | 687.6   | 56.2  | 1403.2  |
| 346 | C | 4466 | 2.95 | 16255.7 | 160.2 | 4463 | 2.99 | 4659.5  | 61.9  | 11596.3 |
| 347 | A | 4454 | 2.79 | 9316.9  | 118.6 | 4451 | 2.43 | 1576.8  | 40.2  | 7740.1  |
| 348 | U | 4442 | 2.65 | 6039.2  | 145.5 | 4438 | 2.05 | 553.2   | 46.0  | 5485.9  |
| 349 | C | 4428 | 3.08 | 11549.5 | 189.1 | 4424 | 3.04 | 3723.3  | 50.6  | 7826.2  |
| 350 | U | 4416 | 2.95 | 21152.9 | 222.8 | 4413 | 3.04 | 6201.0  | 48.2  | 14951.9 |
| 351 | G | 4406 | 2.55 | 1541.0  | 93.9  | 4402 | 2.24 | 397.1   | 27.2  | 1143.9  |
| 352 | G | 4396 | 2.55 | 883.5   | 63.6  | 4392 | 3.04 | 258.1   | 26.4  | 625.4   |
| 353 | U | 4385 | 2.77 | 6918.8  | 84.7  | 4381 | 2.67 | 2073.4  | 53.4  | 4845.4  |
| 354 | U | 4373 | 3.07 | 5777.4  | 86.3  | 4371 | 2.46 | 1622.8  | 94.2  | 4154.5  |
| 355 | G | 4363 | 3.74 | 8253.2  | 281.0 | 4361 | 3.32 | 6440.0  | 142.8 | 1813.3  |
| 356 | G | 4354 | 3.15 | 47385.6 | 495.9 | 4351 | 3.64 | 19071.1 | 131.1 | 28314.4 |
| 357 | U | 4344 | 2.76 | 15672.9 | 231.3 | 4339 | 3.39 | 5132.5  | 184.1 | 10540.3 |
| 358 | C | 4331 | 3.25 | 15944.5 | 251.1 | 4327 | 3.21 | 5533.2  | 131.8 | 10411.2 |
| 359 | A | 4319 | 3.17 | 27989.4 | 304.7 | 4315 | 3.24 | 6754.3  | 96.5  | 21235.0 |
| 360 | U | 4309 | 3.03 | 22598.2 | 231.5 | 4305 | 2.91 | 5784.0  | 62.6  | 16814.2 |
| 361 | U | 4298 | 3.15 | 3082.3  | 86.6  | 4294 | 2.24 | 596.7   | 47.0  | 2485.6  |
| 362 | U | 4286 | 2.95 | 7471.0  | 102.3 | 4283 | 2.24 | 673.3   | 25.8  | 6797.7  |
| 363 | U | 4275 | 2.67 | 4362.6  | 67.5  | 4271 | 2.24 | 662.6   | 16.8  | 3699.9  |
| 364 | A | 4263 | 2.57 | 5165.7  | 73.2  | 4259 | 2.29 | 1243.3  | 31.6  | 3922.4  |
| 365 | C | 4253 | 4.20 | 1073.6  | 238.3 | 4249 | 4.63 | 568.3   | 86.8  | 505.3   |
| 366 | G | 4243 | 3.93 | 6792.0  | 72.5  | 4239 | 4.04 | 3042.5  | 34.7  | 3749.4  |
| 367 | G | 4233 | 2.88 | 4037.5  | 172.8 | 4229 | 2.60 | 979.5   | 52.5  | 3058.1  |
| 368 | A | 4223 | 2.55 | 1548.1  | 87.6  | 4219 | 2.24 | 47.3    | 23.6  | 1500.8  |
| 369 | C | 4211 | 2.79 | 5381.3  | 75.4  | 4208 | 2.44 | 1733.9  | 19.0  | 3647.4  |
| 370 | A | 4199 | 2.55 | 6530.5  | 75.4  | 4196 | 2.24 | 147.8   | 22.7  | 6382.7  |
| 371 | C | 4185 | 2.55 | 6104.6  | 78.0  | 4181 | 2.24 | 1574.8  | 28.6  | 4529.9  |
| 372 | C | 4173 | 2.55 | 2304.7  | 91.0  | 4168 | 2.36 | 495.9   | 28.2  | 1808.8  |
| 373 | C | 4161 | 2.77 | 9716.8  | 187.0 | 4157 | 2.67 | 3645.0  | 48.8  | 6071.9  |
| 374 | A | 4150 | 3.07 | 16862.9 | 121.5 | 4147 | 2.85 | 3598.6  | 58.1  | 13264.4 |
| 375 | U | 4139 | 2.99 | 10769.8 | 147.9 | 4136 | 3.47 | 2645.4  | 50.4  | 8124.5  |
| 376 | C | 4126 | 3.01 | 13670.1 | 186.9 | 4122 | 3.23 | 6564.8  | 85.9  | 7105.3  |
| 377 | U | 4115 | 3.25 | 26897.8 | 134.1 | 4112 | 3.52 | 11310.9 | 144.9 | 15586.9 |
| 378 | A | 4103 | 3.12 | 23513.1 | 278.7 | 4099 | 3.28 | 8738.9  | 239.4 | 14774.1 |
| 379 | U | 4093 | 3.26 | 32309.4 | 426.0 | 4090 | 3.32 | 14192.1 | 220.2 | 18117.3 |
| 380 | G | 4083 | 3.37 | 14099.8 | 517.7 | 4080 | 3.91 | 3404.7  | 138.2 | 10695.1 |
| 381 | A | 4073 | 2.45 | 7033.4  | 158.3 | 4069 | 2.37 | 1754.9  | 57.4  | 5278.5  |
| 382 | U | 4061 | 2.69 | 6063.0  | 89.0  | 4058 | 2.37 | 615.5   | 26.0  | 5447.5  |
| 383 | U | 4051 | 2.45 | 3219.3  | 117.3 | 4047 | 3.21 | 1410.8  | 39.6  | 1808.4  |
| 384 | C | 4039 | 2.69 | 6867.7  | 248.0 | 4034 | 3.35 | 4885.1  | 33.7  | 1982.6  |

|     |   |      |      |         |       |      |      |        |       |         |
|-----|---|------|------|---------|-------|------|------|--------|-------|---------|
| 385 | C | 4029 | 4.50 | 436.2   | 270.5 | 4029 | 4.52 | 1088.2 | 158.5 | -651.9  |
| 386 | G | 4020 | 4.25 | 17294.5 | 243.7 | 4018 | 4.37 | 9822.8 | 108.0 | 7471.7  |
| 387 | U | 4009 | 2.45 | 3234.7  | 141.1 | 4006 | 4.57 | 1155.1 | 90.5  | 2079.7  |
| 388 | A | 3998 | 3.15 | 9314.4  | 133.0 | 3994 | 3.05 | 3145.7 | 77.6  | 6168.7  |
| 389 | U | 3989 | 3.21 | 11624.4 | 138.3 | 3986 | 2.80 | 2434.5 | 33.4  | 9189.9  |
| 390 | A | 3978 | 2.45 | 2553.2  | 120.0 | 3975 | 2.37 | 0.0    | 29.5  | 2553.2  |
| 391 | C | 3966 | 2.93 | 5867.1  | 117.0 | 3963 | 2.91 | 3097.1 | 38.1  | 2770.0  |
| 392 | A | 3956 | 2.81 | 12424.8 | 181.5 | 3953 | 2.72 | 2484.4 | 46.2  | 9940.4  |
| 393 | C | 3943 | 2.45 | 2627.6  | 85.3  | 3939 | 2.37 | 1201.3 | 36.6  | 1426.2  |
| 394 | C | 3931 | 2.60 | 4934.9  | 152.0 | 3927 | 3.07 | 2267.6 | 39.5  | 2667.3  |
| 395 | U | 3921 | 3.25 | 6114.7  | 86.4  | 3917 | 2.73 | 1420.1 | 39.5  | 4694.5  |
| 396 | U | 3911 | 2.76 | 14033.7 | 226.1 | 3908 | 3.31 | 4323.3 | 64.1  | 9710.4  |
| 397 | A | 3900 | 3.07 | 16811.1 | 226.9 | 3896 | 3.25 | 4268.1 | 45.4  | 12543.0 |
| 398 | U | 3889 | 3.09 | 11313.6 | 150.5 | 3885 | 3.21 | 3088.6 | 38.5  | 8225.1  |
| 399 | C | 3877 | 3.00 | 10881.8 | 134.5 | 3873 | 3.21 | 3961.3 | 43.2  | 6920.5  |
| 400 | A | 3866 | 3.28 | 10403.0 | 132.1 | 3862 | 2.99 | 2368.9 | 54.2  | 8034.1  |
| 401 | A | 3854 | 3.09 | 18026.3 | 282.3 | 3851 | 3.31 | 6037.5 | 55.7  | 11988.9 |
| 402 | A | 3844 | 2.99 | 6526.4  | 240.5 | 3839 | 3.34 | 1480.4 | 28.2  | 5046.0  |
| 403 | U | 3832 | 3.47 | 7297.0  | 140.5 | 3828 | 3.29 | 2218.6 | 65.8  | 5078.4  |
| 404 | G | 3824 | 2.37 | 3252.8  | 107.8 | 3823 | 5.06 | 2156.1 | 44.9  | 1096.7  |
| 405 | U | 3817 | 2.59 | 2639.0  | 79.3  | 3812 | 2.94 | 1027.1 | 29.3  | 1611.9  |
| 406 | C | 3803 | 3.91 | 8366.0  | 133.8 | 3799 | 4.16 | 5121.3 | 60.1  | 3244.7  |
| 407 | G | 3792 | 3.46 | 1983.9  | 132.6 | 3788 | 3.22 | 1440.2 | 77.0  | 543.7   |
| 408 | C | 3781 | 1.67 | 328.2   | 19.2  | 3777 | 2.11 | 368.4  | 25.2  | -40.3   |
| 409 | C | 3770 | 2.57 | 1009.0  | 61.8  | 3765 | 2.39 | 1079.0 | 37.4  | -70.0   |
| 410 | U | 3759 | 3.22 | 6799.5  | 81.9  | 3754 | 4.13 | 4262.8 | 63.0  | 2536.7  |
| 411 | A | 3748 | 3.22 | 8273.1  | 86.6  | 3748 | 2.11 | 175.6  | 33.7  | 8097.5  |
| 412 | U | 3739 | 4.12 | 2010.6  | 101.8 | 3743 | 4.11 | 4347.9 | 43.1  | -2337.3 |
| 413 | G | 3730 | 3.47 | 3427.7  | 92.6  | 3727 | 3.91 | 1778.8 | 46.5  | 1648.9  |
| 414 | U | 3722 | 2.94 | 4908.4  | 57.8  | 3717 | 3.11 | 2034.1 | 39.6  | 2874.3  |
| 415 | A | 3712 | 3.07 | 6335.8  | 78.8  | 3707 | 2.86 | 1581.5 | 27.8  | 4754.2  |
| 416 | C | 3702 | 3.47 | 2287.4  | 96.3  | 3702 | 4.85 | 423.9  | 47.1  | 1863.5  |
| 417 | U | 3691 | 3.43 | 5359.6  | 95.3  | 3690 | 5.06 | 997.2  | 74.6  | 4362.4  |
| 418 | U | 3681 | 3.43 | 10907.3 | 69.1  | 3676 | 4.03 | 3808.5 | 78.7  | 7098.7  |
| 419 | U | 3671 | 3.47 | 4930.4  | 58.9  | 3667 | 2.55 | 1562.3 | 42.6  | 3368.1  |
| 420 | C | 3660 | 3.37 | 1199.3  | 63.0  | 3657 | 3.21 | 40.4   | 33.9  | 1158.9  |
| 421 | C | 3650 | 3.40 | 4661.4  | 62.2  | 3645 | 2.83 | 3293.9 | 75.4  | 1367.5  |

## SHAPE\_example\_2\_peaks.txt

| seqnum | seq | RX.pos | RX.sigma | RX.area | RX.rms | BG.pos | BG.sigma | BG.area | BG.rms | (RX.area-BG.area) |
|--------|-----|--------|----------|---------|--------|--------|----------|---------|--------|-------------------|
| 6      | G   | 9290   | 4.54     | 3856.3  | 46.7   | 9285   | 5.33     | 1903.1  | 50.2   | 1953.2            |
| 7      | A   | 9275   | 3.98     | 8520.5  | 65.0   | 9272   | 4.45     | 2603.8  | 30.5   | 5916.7            |
| 8      | A   | 9261   | 3.91     | 1311.8  | 57.4   | 9256   | 4.10     | 115.6   | 34.0   | 1196.2            |
| 9      | C   | 9243   | 4.41     | 8506.0  | 90.1   | 9239   | 5.19     | 2714.0  | 61.2   | 5792.0            |
| 10     | U   | 9228   | 4.10     | 16193.6 | 111.4  | 9223   | 4.10     | 4288.0  | 77.8   | 11905.6           |
| 11     | U   | 9210   | 3.05     | 677.0   | 118.7  | 9206   | 4.10     | 311.4   | 68.4   | 365.6             |
| 12     | C   | 9194   | 4.96     | 16211.7 | 174.6  | 9189   | 5.05     | 4573.8  | 50.5   | 11637.9           |
| 13     | U   | 9179   | 4.86     | 29677.4 | 228.0  | 9175   | 4.91     | 7655.7  | 59.5   | 22021.8           |
| 14     | A   | 9163   | 4.91     | 11461.0 | 198.4  | 9159   | 4.95     | 2021.1  | 56.8   | 9439.9            |
| 15     | G   | 9148   | 3.42     | 2660.4  | 93.0   | 9143   | 4.10     | 718.7   | 31.6   | 1941.7            |
| 16     | U   | 9132   | 4.46     | 6787.3  | 72.8   | 9127   | 4.50     | 2119.0  | 31.9   | 4668.3            |
| 17     | A   | 9116   | 4.22     | 7594.6  | 88.9   | 9113   | 4.35     | 2224.5  | 27.4   | 5370.1            |
| 18     | U   | 9101   | 3.05     | 425.5   | 68.7   | 9095   | 4.10     | 184.1   | 25.2   | 241.3             |
| 19     | A   | 9084   | 4.31     | 6322.5  | 73.2   | 9079   | 4.10     | 1387.7  | 27.5   | 4934.8            |
| 20     | U   | 9068   | 4.63     | 6079.5  | 95.0   | 9063   | 4.42     | 1179.4  | 38.5   | 4900.1            |
| 21     | U   | 9053   | 4.72     | 13538.2 | 128.0  | 9048   | 5.19     | 2492.1  | 44.9   | 11046.1           |
| 22     | C   | 9036   | 5.06     | 18345.2 | 209.3  | 9032   | 5.12     | 4924.1  | 63.9   | 13421.1           |
| 23     | U   | 9020   | 5.22     | 24162.1 | 224.0  | 9017   | 5.60     | 8255.3  | 105.2  | 15906.8           |
| 24     | G   | 9006   | 5.12     | 17806.8 | 91.6   | 9001   | 5.09     | 5516.9  | 91.6   | 12289.9           |
| 25     | U   | 8993   | 5.51     | 11167.2 | 138.7  | 8990   | 5.14     | 3659.2  | 82.4   | 7508.0            |
| 26     | A   | 8977   | 5.25     | 5290.3  | 224.7  | 8974   | 6.55     | 1476.6  | 81.2   | 3813.7            |
| 27     | U   | 8961   | 4.80     | 8825.4  | 72.4   | 8958   | 4.52     | 2459.0  | 26.5   | 6366.4            |
| 28     | A   | 8945   | 3.99     | 6192.9  | 129.3  | 8942   | 4.10     | 1021.3  | 36.3   | 5171.6            |
| 29     | C   | 8928   | 3.05     | 2024.6  | 96.8   | 8925   | 4.10     | 176.6   | 29.3   | 1847.9            |
| 30     | C   | 8910   | 3.05     | 8050.5  | 88.7   | 8907   | 4.56     | 3326.5  | 26.2   | 4724.0            |
| 31     | U   | 8895   | 3.77     | 8080.7  | 148.5  | 8891   | 4.81     | 2816.1  | 41.0   | 5264.6            |
| 32     | A   | 8879   | 4.05     | 18482.7 | 74.7   | 8875   | 4.60     | 3521.1  | 44.8   | 14961.7           |
| 33     | A   | 8863   | 3.65     | 11562.1 | 92.6   | 8859   | 4.60     | 2205.1  | 42.4   | 9357.0            |
| 34     | U   | 8848   | 4.28     | 14791.8 | 184.8  | 8844   | 4.85     | 4501.7  | 46.3   | 10290.1           |
| 35     | A   | 8831   | 4.60     | 27127.0 | 149.1  | 8828   | 4.78     | 5091.0  | 47.5   | 22036.1           |
| 36     | U   | 8815   | 4.60     | 14956.7 | 160.1  | 8812   | 4.75     | 2385.6  | 40.2   | 12571.1           |
| 37     | U   | 8800   | 4.48     | 30571.4 | 147.2  | 8797   | 4.64     | 4298.5  | 36.8   | 26272.9           |
| 38     | A   | 8784   | 4.60     | 15265.7 | 124.4  | 8781   | 4.53     | 3838.3  | 36.3   | 11427.4           |
| 39     | U   | 8769   | 4.16     | 5981.5  | 46.6   | 8764   | 2.35     | 285.2   | 22.3   | 5696.3            |
| 40     | A   | 8753   | 4.05     | 5708.0  | 36.4   | 8750   | 3.92     | 1530.5  | 14.3   | 4177.5            |
| 41     | G   | 8739   | 3.50     | 2662.4  | 45.7   | 8736   | 3.43     | 702.1   | 16.4   | 1960.3            |
| 42     | C   | 8722   | 3.05     | 1248.8  | 37.9   | 8719   | 2.35     | 40.0    | 8.6    | 1208.8            |
| 43     | C   | 8706   | 3.05     | 2811.7  | 37.8   | 8703   | 2.35     | 371.1   | 11.5   | 2440.6            |
| 44     | U   | 8690   | 3.05     | 2440.0  | 71.5   | 8687   | 2.35     | 419.8   | 18.6   | 2020.2            |
| 45     | U   | 8675   | 4.65     | 6541.5  | 120.6  | 8670   | 2.98     | 675.4   | 23.1   | 5866.1            |
| 46     | U   | 8660   | 4.65     | 23857.6 | 131.3  | 8657   | 4.22     | 3237.9  | 34.1   | 20619.7           |
| 47     | A   | 8644   | 4.70     | 22202.6 | 143.1  | 8640   | 4.40     | 2806.3  | 31.5   | 19396.3           |
| 48     | U   | 8627   | 4.58     | 10252.7 | 151.7  | 8622   | 3.78     | 2244.6  | 61.6   | 8008.0            |

|    |   |      |      |         |       |      |      |        |       |         |
|----|---|------|------|---------|-------|------|------|--------|-------|---------|
| 49 | C | 8611 | 4.95 | 26781.1 | 274.8 | 8607 | 5.80 | 7991.7 | 97.5  | 18789.4 |
| 50 | A | 8595 | 4.85 | 24293.1 | 357.8 | 8591 | 4.80 | 5115.5 | 116.3 | 19177.6 |
| 51 | A | 8580 | 4.70 | 20850.2 | 206.4 | 8577 | 4.19 | 4610.5 | 27.9  | 16239.8 |
| 52 | C | 8562 | 4.65 | 11063.5 | 225.3 | 8560 | 3.52 | 1579.6 | 48.0  | 9483.8  |
| 53 | A | 8546 | 4.33 | 14858.9 | 96.8  | 8544 | 2.76 | 1417.9 | 27.1  | 13441.1 |
| 54 | A | 8529 | 4.28 | 10847.5 | 98.2  | 8526 | 4.14 | 1412.1 | 37.4  | 9435.4  |
| 55 | U | 8515 | 4.24 | 15478.6 | 77.1  | 8512 | 4.15 | 4096.1 | 31.3  | 11382.5 |
| 56 | G | 8503 | 4.38 | 7947.4  | 80.8  | 8501 | 4.24 | 2795.9 | 41.9  | 5151.5  |
| 57 | G | 8488 | 4.60 | 1305.5  | 73.6  | 8486 | 4.74 | 61.1   | 16.5  | 1244.3  |
| 58 | A | 8473 | 3.00 | 1464.1  | 25.5  | 8471 | 1.64 | 120.9  | 3.5   | 1343.2  |
| 59 | A | 8457 | 3.00 | 1025.4  | 31.9  | 8456 | 1.64 | 88.1   | 3.7   | 937.4   |
| 60 | U | 8442 | 3.16 | 1403.7  | 37.9  | 8440 | 1.64 | 142.5  | 12.5  | 1261.2  |
| 61 | C | 8426 | 3.30 | 4449.1  | 44.3  | 8424 | 3.11 | 1429.4 | 17.7  | 3019.7  |
| 62 | C | 8409 | 3.10 | 2376.0  | 106.2 | 8405 | 3.97 | 706.3  | 34.3  | 1669.7  |
| 63 | C | 8393 | 4.20 | 14577.0 | 71.2  | 8391 | 4.19 | 4772.4 | 28.9  | 9804.6  |
| 64 | A | 8378 | 4.25 | 20411.9 | 91.0  | 8376 | 4.24 | 3601.1 | 26.3  | 16810.8 |
| 65 | A | 8362 | 4.28 | 15230.3 | 99.8  | 8359 | 4.29 | 2284.9 | 27.0  | 12945.4 |
| 66 | C | 8345 | 4.20 | 18186.1 | 104.9 | 8343 | 4.38 | 5735.5 | 32.2  | 12450.6 |
| 67 | A | 8330 | 4.25 | 21046.7 | 102.2 | 8327 | 4.29 | 3681.2 | 39.3  | 17365.5 |
| 68 | A | 8314 | 4.23 | 24715.5 | 72.5  | 8312 | 4.02 | 5125.8 | 35.2  | 19589.7 |
| 69 | U | 8299 | 4.15 | 8941.2  | 64.4  | 8296 | 4.14 | 762.0  | 41.9  | 8179.2  |
| 70 | U | 8285 | 4.00 | 23388.1 | 102.9 | 8282 | 3.68 | 3606.9 | 78.1  | 19781.2 |
| 71 | A | 8270 | 3.76 | 12591.8 | 169.8 | 8268 | 2.24 | 1105.9 | 31.7  | 11485.9 |
| 72 | U | 8254 | 3.00 | 3689.6  | 131.5 | 8251 | 1.64 | 53.3   | 16.3  | 3636.3  |
| 73 | C | 8238 | 3.00 | 4040.9  | 49.3  | 8236 | 2.79 | 1096.9 | 27.8  | 2944.1  |
| 74 | U | 8222 | 3.00 | 836.3   | 50.1  | 8220 | 1.92 | 319.0  | 19.9  | 517.4   |
| 75 | C | 8207 | 3.94 | 6604.1  | 85.2  | 8205 | 3.97 | 1704.3 | 30.0  | 4899.8  |
| 76 | A | 8192 | 4.23 | 17071.2 | 41.3  | 8190 | 4.06 | 2819.5 | 26.0  | 14251.7 |
| 77 | A | 8177 | 4.25 | 11480.1 | 46.0  | 8175 | 3.68 | 1479.6 | 24.2  | 10000.5 |
| 78 | C | 8160 | 3.89 | 4566.4  | 57.1  | 8158 | 4.21 | 1535.9 | 29.7  | 3030.5  |
| 79 | A | 8145 | 3.90 | 7102.6  | 46.2  | 8142 | 3.89 | 2611.5 | 31.0  | 4491.1  |
| 80 | U | 8130 | 3.63 | 2588.5  | 45.4  | 8128 | 3.63 | 1062.4 | 13.6  | 1526.0  |
| 81 | U | 8114 | 3.15 | 482.7   | 33.8  | 8111 | 2.58 | 97.7   | 16.3  | 385.1   |
| 82 | C | 8100 | 3.49 | 3711.8  | 55.1  | 8098 | 2.76 | 579.1  | 14.8  | 3132.7  |
| 83 | A | 8084 | 3.95 | 8051.8  | 55.1  | 8082 | 2.80 | 1028.3 | 19.0  | 7023.5  |
| 84 | C | 8067 | 3.87 | 7222.3  | 62.1  | 8065 | 3.41 | 1440.7 | 45.9  | 5781.6  |
| 85 | C | 8051 | 4.20 | 14710.4 | 74.0  | 8048 | 4.21 | 3399.2 | 35.9  | 11311.2 |
| 86 | C | 8035 | 4.29 | 21704.0 | 81.0  | 8033 | 4.21 | 5886.6 | 36.3  | 15817.4 |
| 87 | A | 8020 | 4.40 | 19018.3 | 93.1  | 8018 | 3.92 | 2023.3 | 43.3  | 16995.0 |
| 88 | A | 8004 | 4.35 | 10738.6 | 86.4  | 8002 | 2.67 | 1293.6 | 31.5  | 9445.0  |
| 89 | U | 7989 | 4.00 | 7982.0  | 83.7  | 7987 | 1.76 | 334.6  | 14.4  | 7647.4  |
| 90 | U | 7974 | 3.70 | 7347.0  | 60.9  | 7972 | 1.76 | 375.6  | 13.2  | 6971.3  |
| 91 | C | 7958 | 3.31 | 4869.8  | 49.1  | 7955 | 1.76 | 641.1  | 16.9  | 4228.7  |
| 92 | U | 7942 | 3.15 | 3165.7  | 49.3  | 7939 | 1.76 | 356.2  | 16.9  | 2809.5  |
| 93 | C | 7926 | 3.63 | 6362.9  | 129.3 | 7923 | 1.99 | 603.5  | 28.8  | 5759.5  |
| 94 | A | 7909 | 3.96 | 13900.1 | 94.9  | 7907 | 3.56 | 2204.5 | 33.2  | 11695.5 |
| 95 | U | 7894 | 3.96 | 11143.5 | 99.4  | 7891 | 3.80 | 2930.5 | 21.6  | 8213.0  |
| 96 | G | 7880 | 4.15 | 2907.5  | 83.8  | 7878 | 2.87 | 582.1  | 19.2  | 2325.4  |

|     |   |      |      |         |       |      |      |        |      |         |
|-----|---|------|------|---------|-------|------|------|--------|------|---------|
| 97  | G | 7864 | 3.15 | 1443.0  | 43.7  | 7863 | 1.96 | 199.1  | 19.1 | 1243.9  |
| 98  | U | 7849 | 3.35 | 5639.2  | 86.1  | 7846 | 2.95 | 1767.0 | 26.9 | 3872.1  |
| 99  | A | 7831 | 3.70 | 5386.1  | 139.9 | 7828 | 2.76 | 1333.7 | 19.8 | 4052.5  |
| 100 | G | 7817 | 4.25 | 2.7     | 125.2 | 7815 | 1.76 | 0.0    | 17.2 | 2.7     |
| 101 | C | 7805 | 3.82 | 4481.8  | 47.6  | 7802 | 3.19 | 1112.8 | 16.8 | 3368.9  |
| 102 | G | 7792 | 3.61 | 4083.4  | 71.2  | 7789 | 2.62 | 397.2  | 17.7 | 3686.2  |
| 103 | C | 7775 | 3.61 | 4579.7  | 70.4  | 7772 | 3.30 | 1088.7 | 19.8 | 3491.0  |
| 104 | C | 7759 | 3.85 | 10681.5 | 42.2  | 7757 | 3.72 | 2671.6 | 21.4 | 8009.9  |
| 105 | U | 7743 | 3.61 | 4502.7  | 50.7  | 7741 | 3.17 | 1053.5 | 25.5 | 3449.1  |
| 106 | G | 7729 | 3.80 | 2763.2  | 91.7  | 7726 | 3.57 | 523.8  | 30.3 | 2239.4  |
| 107 | U | 7714 | 4.04 | 14174.4 | 71.3  | 7712 | 4.17 | 3860.0 | 18.8 | 10314.4 |
| 108 | G | 7700 | 3.68 | 7542.1  | 79.7  | 7698 | 4.02 | 2093.3 | 21.7 | 5448.8  |
| 109 | C | 7686 | 3.77 | 7114.9  | 72.4  | 7683 | 3.66 | 2284.9 | 29.2 | 4830.0  |
| 110 | U | 7670 | 3.96 | 10365.3 | 54.9  | 7668 | 3.79 | 3282.0 | 34.5 | 7083.4  |
| 111 | U | 7655 | 3.85 | 12793.0 | 64.4  | 7652 | 3.97 | 2682.6 | 46.9 | 10110.4 |
| 112 | C | 7638 | 3.85 | 15765.9 | 65.8  | 7635 | 3.74 | 4243.0 | 65.3 | 11522.9 |
| 113 | G | 7624 | 3.61 | 4821.8  | 99.0  | 7622 | 3.17 | 790.4  | 29.8 | 4031.4  |
| 114 | G | 7609 | 3.61 | 2416.9  | 124.3 | 7605 | 3.17 | 407.3  | 47.4 | 2009.6  |
| 115 | U | 7593 | 4.31 | 16638.5 | 142.8 | 7590 | 4.26 | 4195.0 | 47.4 | 12443.5 |
| 116 | U | 7578 | 4.03 | 21065.0 | 239.0 | 7576 | 4.02 | 5922.8 | 53.6 | 15142.2 |
| 117 | A | 7565 | 3.61 | 515.1   | 59.4  | 7562 | 3.17 | 0.0    | 13.4 | 515.1   |
| 118 | C | 7551 | 3.61 | 2782.2  | 49.2  | 7548 | 4.26 | 1125.1 | 23.3 | 1657.1  |
| 119 | U | 7537 | 3.76 | 5985.2  | 35.4  | 7534 | 4.02 | 2457.1 | 33.5 | 3528.1  |
| 120 | U | 7522 | 3.61 | 2358.3  | 43.1  | 7519 | 3.17 | 783.4  | 20.9 | 1574.9  |
| 121 | C | 7506 | 3.61 | 1204.3  | 67.5  | 7503 | 3.17 | 198.3  | 24.7 | 1006.0  |
| 122 | U | 7490 | 3.91 | 8284.2  | 64.5  | 7488 | 3.88 | 2301.1 | 20.8 | 5983.2  |
| 123 | A | 7475 | 4.23 | 19393.3 | 143.5 | 7473 | 4.27 | 4317.6 | 31.0 | 15075.7 |
| 124 | A | 7459 | 4.18 | 29999.1 | 191.7 | 7457 | 4.15 | 3461.0 | 43.5 | 26538.2 |
| 125 | G | 7446 | 3.75 | 9293.3  | 44.1  | 7444 | 3.17 | 881.2  | 35.7 | 8412.1  |
| 126 | G | 7433 | 4.12 | 10474.1 | 63.2  | 7431 | 4.10 | 3315.9 | 33.6 | 7158.2  |
| 127 | A | 7418 | 3.55 | 4338.7  | 93.7  | 7416 | 2.90 | 901.6  | 35.0 | 3437.1  |
| 128 | A | 7404 | 2.97 | 1626.3  | 104.2 | 7401 | 4.25 | 229.2  | 42.0 | 1397.1  |
| 129 | G | 7390 | 4.01 | 10968.1 | 66.9  | 7387 | 4.04 | 4166.9 | 47.9 | 6801.2  |
| 130 | U | 7375 | 3.37 | 2551.7  | 72.3  | 7373 | 2.49 | 476.8  | 17.6 | 2074.9  |
| 131 | C | 7360 | 2.97 | 1454.4  | 45.3  | 7357 | 2.49 | 140.3  | 10.9 | 1314.1  |
| 132 | C | 7345 | 3.17 | 5302.7  | 63.4  | 7343 | 2.84 | 1323.4 | 22.9 | 3979.3  |
| 133 | A | 7330 | 2.97 | 1711.1  | 64.6  | 7327 | 2.49 | 511.0  | 25.9 | 1200.2  |
| 134 | C | 7314 | 3.27 | 6083.9  | 62.7  | 7311 | 3.24 | 2343.1 | 33.1 | 3740.7  |
| 135 | A | 7298 | 2.99 | 3148.0  | 55.6  | 7296 | 3.01 | 916.2  | 31.1 | 2231.8  |
| 136 | C | 7283 | 3.53 | 6828.6  | 78.9  | 7280 | 3.29 | 1993.2 | 30.0 | 4835.5  |
| 137 | A | 7268 | 3.82 | 9550.7  | 42.9  | 7266 | 3.33 | 1408.6 | 40.7 | 8142.1  |
| 138 | A | 7253 | 3.82 | 17704.4 | 58.7  | 7251 | 3.89 | 3749.1 | 25.8 | 13955.3 |
| 139 | A | 7238 | 3.92 | 24612.0 | 59.9  | 7236 | 3.84 | 4533.3 | 25.3 | 20078.7 |
| 140 | U | 7223 | 3.92 | 9657.1  | 85.3  | 7220 | 3.99 | 1507.7 | 33.1 | 8149.4  |
| 141 | C | 7208 | 3.87 | 17712.3 | 102.5 | 7205 | 4.04 | 4642.5 | 48.7 | 13069.9 |
| 142 | A | 7193 | 3.97 | 33974.4 | 102.5 | 7191 | 3.99 | 7322.8 | 52.1 | 26651.6 |
| 143 | A | 7178 | 3.97 | 19664.4 | 108.0 | 7176 | 3.45 | 2349.0 | 46.3 | 17315.4 |
| 144 | G | 7164 | 3.25 | 5033.1  | 83.7  | 7160 | 2.49 | 24.6   | 12.9 | 5008.5  |

|     |   |      |      |         |       |      |      |        |      |         |
|-----|---|------|------|---------|-------|------|------|--------|------|---------|
| 145 | A | 7147 | 3.01 | 4203.5  | 62.7  | 7144 | 2.49 | 120.2  | 14.3 | 4083.3  |
| 146 | U | 7133 | 3.27 | 7510.3  | 71.2  | 7131 | 3.34 | 2010.9 | 23.9 | 5499.4  |
| 147 | C | 7119 | 3.09 | 4354.8  | 49.6  | 7116 | 3.09 | 1419.7 | 26.0 | 2935.2  |
| 148 | C | 7104 | 3.35 | 6900.6  | 28.7  | 7102 | 3.49 | 2093.2 | 34.6 | 4807.5  |
| 149 | G | 7090 | 3.57 | 5084.0  | 61.9  | 7086 | 3.66 | 1464.0 | 27.2 | 3620.0  |
| 150 | U | 7076 | 3.82 | 18465.1 | 68.5  | 7074 | 4.24 | 4870.2 | 47.0 | 13595.0 |
| 151 | U | 7062 | 3.90 | 15937.6 | 111.7 | 7059 | 3.65 | 2325.8 | 50.2 | 13611.8 |
| 152 | A | 7046 | 3.95 | 12554.6 | 126.4 | 7045 | 4.11 | 1031.1 | 61.5 | 11523.5 |
| 153 | G | 7033 | 3.80 | 23671.8 | 160.7 | 7031 | 4.05 | 4763.2 | 45.0 | 18908.6 |
| 154 | A | 7019 | 3.59 | 15074.8 | 80.8  | 7016 | 3.25 | 1597.3 | 44.2 | 13477.5 |
| 155 | C | 7003 | 3.50 | 10651.1 | 52.5  | 7001 | 3.75 | 3384.6 | 53.6 | 7266.5  |
| 156 | G | 6990 | 3.40 | 4759.9  | 47.7  | 6987 | 4.05 | 1939.2 | 24.4 | 2820.7  |
| 157 | U | 6976 | 3.50 | 5175.3  | 45.7  | 6973 | 3.88 | 1826.6 | 17.0 | 3348.7  |
| 158 | U | 6962 | 3.40 | 8537.3  | 66.1  | 6960 | 3.77 | 2781.3 | 25.9 | 5756.0  |
| 159 | U | 6948 | 2.95 | 1004.1  | 99.5  | 6945 | 4.05 | 528.4  | 37.0 | 475.7   |
| 160 | C | 6932 | 3.70 | 16997.2 | 79.9  | 6930 | 3.89 | 4720.5 | 42.3 | 12276.7 |
| 161 | A | 6918 | 3.66 | 12600.6 | 49.2  | 6916 | 3.59 | 2541.3 | 22.6 | 10059.2 |
| 162 | G | 6903 | 2.95 | 608.7   | 39.5  | 6902 | 1.45 | 1.6    | 13.3 | 607.2   |
| 163 | C | 6890 | 2.95 | 1003.5  | 24.9  | 6889 | 1.45 | 14.5   | 5.0  | 989.0   |
| 164 | U | 6877 | 3.30 | 2700.5  | 39.1  | 6875 | 2.00 | 334.2  | 10.0 | 2366.3  |
| 165 | U | 6863 | 3.19 | 2903.7  | 50.4  | 6860 | 1.59 | 166.2  | 15.1 | 2737.6  |
| 166 | C | 6847 | 2.95 | 3653.8  | 57.9  | 6845 | 1.45 | 164.1  | 13.7 | 3489.7  |
| 167 | C | 6832 | 2.95 | 6391.2  | 61.5  | 6830 | 2.00 | 746.7  | 17.4 | 5644.5  |
| 168 | A | 6818 | 2.95 | 5545.8  | 60.7  | 6815 | 1.45 | 98.4   | 17.8 | 5447.5  |
| 169 | A | 6803 | 2.95 | 5730.6  | 99.3  | 6801 | 1.45 | 379.3  | 8.9  | 5351.2  |
| 170 | A | 6789 | 3.35 | 12488.1 | 136.8 | 6787 | 1.45 | 263.0  | 18.6 | 12225.1 |
| 171 | A | 6774 | 3.50 | 18406.2 | 115.7 | 6771 | 2.23 | 1601.6 | 43.5 | 16804.6 |
| 172 | C | 6758 | 3.40 | 12687.8 | 122.7 | 6755 | 2.75 | 2509.1 | 47.7 | 10178.7 |
| 173 | A | 6743 | 3.65 | 10734.8 | 127.4 | 6740 | 3.18 | 1616.0 | 55.8 | 9118.7  |
| 174 | G | 6729 | 3.52 | 11888.1 | 150.4 | 6727 | 3.60 | 3092.1 | 21.6 | 8796.0  |
| 175 | A | 6715 | 3.53 | 12925.9 | 141.3 | 6712 | 3.50 | 2783.1 | 30.2 | 10142.8 |
| 176 | A | 6700 | 3.65 | 15686.9 | 98.2  | 6698 | 3.15 | 2405.5 | 27.7 | 13281.4 |
| 177 | G | 6687 | 2.85 | 1154.3  | 66.7  | 6684 | 2.75 | 430.7  | 27.8 | 723.6   |
| 178 | A | 6672 | 2.85 | 5850.2  | 65.3  | 6670 | 3.12 | 1960.2 | 24.6 | 3890.0  |
| 179 | A | 6657 | 2.85 | 3972.0  | 67.0  | 6655 | 3.12 | 1486.9 | 26.0 | 2485.0  |
| 180 | U | 6642 | 2.85 | 4301.7  | 58.9  | 6640 | 3.67 | 2070.0 | 17.5 | 2231.7  |
| 181 | G | 6629 | 2.85 | 211.0   | 64.3  | 6626 | 4.19 | 634.3  | 32.0 | -423.4  |
| 182 | U | 6615 | 3.57 | 8162.2  | 60.0  | 6612 | 4.07 | 4233.3 | 47.0 | 3928.9  |
| 183 | G | 6602 | 3.55 | 6649.0  | 69.1  | 6600 | 3.76 | 3206.2 | 18.7 | 3442.8  |
| 184 | A | 6587 | 3.28 | 3693.0  | 57.8  | 6585 | 3.77 | 1856.4 | 23.1 | 1836.6  |
| 185 | G | 6574 | 3.45 | 8596.0  | 57.1  | 6572 | 3.87 | 3654.2 | 22.9 | 4941.8  |
| 186 | A | 6560 | 3.41 | 7116.6  | 60.5  | 6557 | 3.71 | 1721.5 | 31.2 | 5395.1  |
| 187 | A | 6545 | 3.66 | 10814.7 | 55.7  | 6542 | 3.72 | 2630.8 | 30.5 | 8183.9  |
| 188 | G | 6532 | 3.80 | 4779.9  | 41.5  | 6530 | 3.72 | 2052.4 | 37.1 | 2727.5  |
| 189 | G | 6520 | 2.89 | 1492.0  | 45.4  | 6517 | 4.27 | 572.2  | 27.1 | 919.7   |
| 190 | C | 6506 | 2.85 | 464.7   | 37.5  | 6503 | 2.75 | 165.1  | 22.8 | 299.6   |
| 191 | U | 6493 | 3.47 | 4958.7  | 48.1  | 6490 | 3.87 | 2347.5 | 12.4 | 2611.2  |
| 192 | U | 6479 | 3.60 | 0.4     | 45.0  | 6476 | 2.75 | 103.7  | 8.5  | -103.3  |

|     |   |      |      |         |       |      |      |        |      |         |
|-----|---|------|------|---------|-------|------|------|--------|------|---------|
| 193 | C | 6465 | 3.03 | 2494.9  | 48.0  | 6462 | 3.96 | 1080.9 | 16.1 | 1414.0  |
| 194 | C | 6450 | 3.65 | 13816.4 | 41.7  | 6448 | 3.92 | 5927.6 | 26.2 | 7888.8  |
| 195 | A | 6435 | 3.60 | 10071.5 | 50.9  | 6433 | 3.87 | 3592.6 | 27.6 | 6478.9  |
| 196 | C | 6420 | 3.55 | 9611.9  | 76.8  | 6418 | 3.76 | 3220.7 | 24.1 | 6391.2  |
| 197 | U | 6406 | 3.48 | 11075.4 | 77.1  | 6404 | 3.87 | 3907.5 | 21.6 | 7167.9  |
| 198 | A | 6392 | 3.28 | 4893.0  | 44.6  | 6389 | 3.55 | 1212.2 | 28.8 | 3680.8  |
| 199 | A | 6377 | 3.40 | 9986.5  | 47.4  | 6375 | 3.86 | 4116.4 | 39.2 | 5870.1  |
| 200 | G | 6365 | 3.48 | 6231.8  | 52.9  | 6362 | 3.87 | 3386.5 | 42.6 | 2845.3  |
| 201 | G | 6353 | 3.54 | 9721.3  | 56.7  | 6351 | 3.76 | 4778.1 | 34.0 | 4943.2  |
| 202 | C | 6339 | 3.11 | 28.8    | 61.5  | 6337 | 4.11 | 139.1  | 42.0 | -110.3  |
| 203 | U | 6326 | 3.58 | 13611.4 | 90.2  | 6323 | 3.89 | 5208.8 | 59.2 | 8402.6  |
| 204 | A | 6313 | 3.54 | 10915.8 | 108.8 | 6311 | 3.20 | 1374.8 | 33.1 | 9540.9  |
| 205 | A | 6299 | 3.51 | 13858.5 | 86.0  | 6296 | 2.90 | 1818.4 | 34.8 | 12040.0 |
| 206 | C | 6284 | 3.13 | 8215.8  | 130.1 | 6282 | 2.66 | 1585.7 | 23.1 | 6630.0  |
| 207 | U | 6271 | 3.11 | 1449.9  | 118.6 | 6267 | 3.46 | 411.2  | 38.8 | 1038.7  |
| 208 | C | 6256 | 3.11 | 8413.8  | 108.4 | 6254 | 3.36 | 4108.9 | 44.2 | 4304.9  |
| 209 | U | 6243 | 3.11 | 4338.7  | 99.3  | 6241 | 3.09 | 1114.7 | 41.6 | 3224.0  |
| 210 | C | 6229 | 3.35 | 10996.8 | 58.1  | 6227 | 3.28 | 3112.9 | 33.4 | 7883.9  |
| 211 | A | 6215 | 3.11 | 10731.0 | 101.6 | 6213 | 2.94 | 2145.9 | 23.7 | 8585.1  |
| 212 | A | 6201 | 3.11 | 10045.6 | 89.6  | 6198 | 2.90 | 1964.3 | 29.5 | 8081.3  |
| 213 | C | 6186 | 3.35 | 10696.1 | 99.9  | 6184 | 3.36 | 2914.3 | 40.5 | 7781.8  |
| 214 | A | 6172 | 3.58 | 13588.0 | 109.1 | 6169 | 3.51 | 2251.6 | 30.2 | 11336.4 |
| 215 | G | 6160 | 3.41 | 19112.4 | 189.5 | 6158 | 3.41 | 4136.8 | 26.4 | 14975.6 |
| 216 | A | 6147 | 3.11 | 8073.5  | 100.3 | 6145 | 2.66 | 759.1  | 20.4 | 7314.4  |
| 217 | C | 6132 | 3.56 | 13765.3 | 178.1 | 6130 | 3.90 | 4360.9 | 52.9 | 9404.4  |
| 218 | A | 6118 | 3.46 | 31212.5 | 246.0 | 6116 | 3.71 | 7117.9 | 67.1 | 24094.5 |
| 219 | A | 6104 | 2.79 | 7256.3  | 158.2 | 6101 | 3.70 | 781.8  | 70.3 | 6474.5  |
| 220 | C | 6090 | 3.46 | 21716.6 | 207.9 | 6087 | 3.70 | 7357.8 | 71.6 | 14358.8 |
| 221 | A | 6076 | 3.46 | 24172.1 | 184.4 | 6074 | 3.32 | 4551.1 | 36.3 | 19621.0 |
| 222 | A | 6063 | 2.53 | 3723.4  | 171.6 | 6061 | 1.59 | 7.8    | 42.2 | 3715.6  |
| 223 | C | 6049 | 3.10 | 12946.6 | 162.5 | 6047 | 2.81 | 3558.7 | 48.0 | 9387.9  |
| 224 | A | 6034 | 3.16 | 12686.2 | 149.1 | 6032 | 1.90 | 1407.8 | 45.5 | 11278.4 |
| 225 | C | 6019 | 2.58 | 5050.1  | 149.9 | 6016 | 1.59 | 244.6  | 48.1 | 4805.5  |
| 226 | C | 6004 | 3.72 | 19247.2 | 202.8 | 6001 | 3.39 | 5432.9 | 39.1 | 13814.3 |
| 227 | U | 5991 | 3.91 | 21146.7 | 104.3 | 5989 | 3.35 | 4961.6 | 35.1 | 16185.1 |
| 228 | G | 5980 | 2.69 | 3094.4  | 217.0 | 5978 | 2.63 | 0.0    | 53.4 | 3094.4  |
| 229 | C | 5968 | 3.63 | 10165.2 | 138.0 | 5966 | 2.09 | 1055.2 | 39.3 | 9110.0  |
| 230 | U | 5955 | 3.48 | 24610.1 | 231.1 | 5953 | 2.59 | 2578.4 | 35.8 | 22031.7 |
| 231 | U | 5943 | 3.33 | 14397.8 | 135.2 | 5940 | 1.59 | 368.4  | 33.7 | 14029.4 |
| 232 | C | 5928 | 3.23 | 13678.8 | 161.8 | 5926 | 1.59 | 863.0  | 11.5 | 12815.8 |
| 233 | A | 5914 | 3.13 | 14467.9 | 145.3 | 5911 | 1.59 | 24.7   | 6.0  | 14443.2 |
| 234 | U | 5900 | 3.23 | 14595.3 | 104.8 | 5897 | 1.59 | 0.0    | 9.9  | 14595.3 |
| 235 | C | 5885 | 3.08 | 12365.7 | 101.0 | 5882 | 1.71 | 1036.5 | 23.4 | 11329.2 |
| 236 | A | 5869 | 3.15 | 11967.3 | 119.6 | 5866 | 1.75 | 884.8  | 40.2 | 11082.5 |
| 237 | G | 5856 | 3.08 | 11544.8 | 129.7 | 5854 | 2.59 | 2303.8 | 53.3 | 9241.0  |
| 238 | C | 5844 | 2.75 | 7053.6  | 141.7 | 5842 | 2.45 | 1813.2 | 36.6 | 5240.5  |
| 239 | U | 5832 | 2.53 | 1810.1  | 119.5 | 5827 | 1.59 | 223.7  | 15.3 | 1586.4  |
| 240 | G | 5822 | 2.53 | 2018.2  | 91.0  | 5820 | 2.06 | 527.5  | 20.4 | 1490.7  |

|     |   |      |      |         |       |      |      |        |      |         |
|-----|---|------|------|---------|-------|------|------|--------|------|---------|
| 241 | U | 5810 | 2.53 | 4401.4  | 71.4  | 5807 | 2.29 | 959.3  | 21.8 | 3442.1  |
| 242 | U | 5797 | 2.69 | 4807.7  | 101.2 | 5794 | 2.29 | 591.3  | 26.1 | 4216.4  |
| 243 | C | 5782 | 2.97 | 10578.1 | 125.0 | 5779 | 2.78 | 1961.7 | 46.6 | 8616.4  |
| 244 | C | 5767 | 3.19 | 16492.6 | 167.4 | 5764 | 3.67 | 4567.5 | 65.4 | 11925.1 |
| 245 | A | 5754 | 3.38 | 23707.9 | 260.2 | 5750 | 3.48 | 5788.0 | 95.1 | 17919.9 |
| 246 | G | 5743 | 3.53 | 20807.0 | 184.8 | 5740 | 3.29 | 6785.1 | 47.6 | 14021.9 |
| 247 | A | 5730 | 3.39 | 7867.6  | 171.0 | 5728 | 3.26 | 2402.2 | 41.1 | 5465.4  |
| 248 | G | 5720 | 3.16 | 9329.6  | 130.8 | 5718 | 3.49 | 1983.7 | 48.9 | 7345.9  |
| 249 | A | 5708 | 3.33 | 17483.1 | 130.6 | 5705 | 3.27 | 2787.9 | 54.5 | 14695.2 |
| 250 | A | 5694 | 2.53 | 2183.4  | 118.9 | 5691 | 2.29 | 164.4  | 20.8 | 2019.0  |
| 251 | C | 5680 | 2.72 | 4568.6  | 67.5  | 5678 | 2.33 | 881.5  | 19.3 | 3687.1  |
| 252 | C | 5666 | 2.98 | 5900.8  | 109.8 | 5664 | 2.98 | 1788.8 | 46.2 | 4112.0  |
| 253 | C | 5651 | 3.23 | 9514.1  | 98.5  | 5649 | 3.52 | 4020.7 | 25.1 | 5493.3  |
| 254 | C | 5638 | 3.15 | 7545.4  | 85.9  | 5635 | 3.46 | 2528.2 | 30.0 | 5017.2  |
| 255 | C | 5624 | 3.23 | 10939.1 | 74.8  | 5621 | 3.36 | 4157.1 | 37.6 | 6782.0  |
| 256 | A | 5610 | 3.16 | 8005.6  | 82.7  | 5607 | 3.17 | 2888.7 | 48.3 | 5116.9  |
| 257 | U | 5598 | 2.67 | 2175.0  | 68.6  | 5595 | 2.88 | 863.0  | 42.0 | 1312.0  |
| 258 | C | 5584 | 3.23 | 8316.9  | 41.7  | 5582 | 3.32 | 3302.8 | 32.6 | 5014.1  |
| 259 | A | 5571 | 2.53 | 2317.4  | 77.2  | 5569 | 3.41 | 715.0  | 48.1 | 1602.4  |
| 260 | U | 5560 | 3.33 | 8089.3  | 112.9 | 5557 | 3.37 | 3359.2 | 46.4 | 4730.1  |
| 261 | G | 5548 | 3.48 | 2752.5  | 86.0  | 5547 | 3.15 | 1169.6 | 34.1 | 1582.9  |
| 262 | C | 5534 | 3.15 | 9546.3  | 140.3 | 5532 | 3.57 | 3219.6 | 23.5 | 6326.7  |
| 263 | C | 5522 | 3.23 | 14303.0 | 154.7 | 5519 | 3.03 | 3459.4 | 32.0 | 10843.6 |
| 264 | U | 5509 | 3.43 | 694.4   | 88.5  | 5506 | 2.43 | 0.0    | 30.7 | 694.4   |
| 265 | C | 5496 | 3.03 | 7750.9  | 60.9  | 5493 | 3.04 | 3240.6 | 43.9 | 4510.4  |
| 266 | U | 5484 | 2.54 | 2562.3  | 68.4  | 5481 | 2.43 | 1085.1 | 37.0 | 1477.1  |
| 267 | C | 5470 | 2.67 | 4241.6  | 103.8 | 5467 | 3.57 | 2245.8 | 44.1 | 1995.8  |
| 268 | C | 5456 | 3.15 | 14773.2 | 107.5 | 5453 | 3.32 | 7135.8 | 72.4 | 7637.4  |
| 269 | U | 5443 | 3.09 | 4198.8  | 84.2  | 5441 | 2.84 | 1877.0 | 41.4 | 2321.8  |
| 270 | C | 5431 | 3.06 | 6973.3  | 123.4 | 5428 | 3.32 | 2168.9 | 19.2 | 4804.4  |
| 271 | A | 5418 | 3.23 | 17745.6 | 170.6 | 5415 | 3.04 | 3394.5 | 40.9 | 14351.1 |
| 272 | A | 5405 | 3.28 | 21376.0 | 170.0 | 5402 | 2.80 | 2106.5 | 37.5 | 19269.5 |
| 273 | C | 5391 | 2.75 | 4359.4  | 108.2 | 5388 | 2.43 | 802.1  | 31.5 | 3557.4  |
| 274 | C | 5377 | 3.15 | 7009.5  | 65.0  | 5374 | 2.95 | 2067.6 | 44.3 | 4941.9  |
| 275 | U | 5365 | 3.10 | 12534.5 | 80.7  | 5363 | 3.18 | 5451.1 | 61.7 | 7083.3  |
| 276 | G | 5354 | 2.72 | 3767.3  | 71.2  | 5352 | 3.23 | 1558.3 | 55.2 | 2209.1  |
| 277 | C | 5340 | 2.54 | 3336.0  | 63.4  | 5338 | 2.43 | 1117.6 | 26.3 | 2218.4  |
| 278 | U | 5327 | 2.54 | 1894.0  | 109.5 | 5324 | 2.43 | 347.1  | 27.7 | 1546.9  |
| 279 | U | 5315 | 3.25 | 11008.3 | 82.4  | 5313 | 3.47 | 3118.3 | 49.0 | 7890.0  |
| 280 | C | 5301 | 3.24 | 15791.8 | 116.9 | 5299 | 3.43 | 5346.7 | 43.2 | 10445.1 |
| 281 | A | 5289 | 2.99 | 5362.7  | 105.4 | 5285 | 3.13 | 1585.5 | 48.1 | 3777.1  |
| 282 | G | 5279 | 3.02 | 3252.2  | 97.0  | 5276 | 2.77 | 1215.2 | 39.9 | 2037.0  |
| 283 | U | 5268 | 2.97 | 7112.4  | 83.9  | 5265 | 3.03 | 2948.5 | 31.6 | 4163.9  |
| 284 | A | 5255 | 2.54 | 2919.0  | 87.4  | 5253 | 2.43 | 914.8  | 26.6 | 2004.2  |
| 285 | C | 5242 | 3.54 | 3018.4  | 144.4 | 5239 | 3.63 | 923.2  | 44.3 | 2095.2  |
| 286 | C | 5228 | 3.16 | 20876.3 | 238.4 | 5226 | 3.29 | 6273.4 | 51.7 | 14602.9 |
| 287 | A | 5216 | 2.66 | 4502.5  | 90.2  | 5213 | 2.80 | 1359.6 | 26.0 | 3142.9  |
| 288 | C | 5202 | 2.59 | 1248.3  | 72.8  | 5199 | 1.95 | 172.0  | 13.1 | 1076.3  |

|     |   |      |      |         |       |      |      |        |       |         |
|-----|---|------|------|---------|-------|------|------|--------|-------|---------|
| 289 | C | 5188 | 2.79 | 7987.4  | 95.3  | 5186 | 2.50 | 1756.6 | 23.8  | 6230.8  |
| 290 | U | 5176 | 2.59 | 2108.8  | 67.4  | 5173 | 2.09 | 422.7  | 25.7  | 1686.1  |
| 291 | C | 5164 | 2.71 | 6940.8  | 119.6 | 5161 | 2.83 | 1569.0 | 33.4  | 5371.8  |
| 292 | C | 5150 | 2.94 | 13837.2 | 132.5 | 5147 | 2.83 | 3476.4 | 58.6  | 10360.8 |
| 293 | A | 5137 | 2.88 | 7751.7  | 148.8 | 5134 | 2.84 | 2351.8 | 68.2  | 5399.8  |
| 294 | C | 5122 | 3.39 | 15724.5 | 95.8  | 5119 | 3.59 | 4651.2 | 52.2  | 11073.4 |
| 295 | A | 5109 | 3.34 | 35517.8 | 164.3 | 5106 | 3.40 | 8013.9 | 113.4 | 27504.0 |
| 296 | G | 5097 | 3.35 | 15773.2 | 208.4 | 5094 | 2.66 | 1895.0 | 54.2  | 13878.2 |
| 297 | A | 5082 | 3.39 | 25141.4 | 198.7 | 5080 | 3.26 | 3694.3 | 37.4  | 21447.1 |
| 298 | A | 5068 | 3.39 | 21946.0 | 220.0 | 5065 | 3.23 | 3439.0 | 42.6  | 18507.0 |
| 299 | U | 5056 | 3.44 | 14333.0 | 265.0 | 5054 | 2.77 | 1451.2 | 30.5  | 12881.8 |
| 300 | G | 5046 | 2.59 | 3336.1  | 87.9  | 5045 | 2.17 | 854.2  | 33.3  | 2481.8  |
| 301 | G | 5036 | 3.33 | 4448.5  | 112.9 | 5035 | 3.95 | 1618.8 | 71.9  | 2829.7  |
| 302 | G | 5026 | 3.20 | 14518.5 | 116.2 | 5023 | 3.33 | 6339.7 | 117.3 | 8178.8  |
| 303 | C | 5013 | 3.15 | 10737.7 | 97.8  | 5010 | 2.80 | 2575.7 | 56.8  | 8162.0  |
| 304 | C | 5000 | 3.20 | 5324.6  | 49.4  | 4998 | 1.95 | 580.8  | 28.0  | 4743.8  |
| 305 | G | 4990 | 2.78 | 2739.6  | 50.3  | 4988 | 1.95 | 109.3  | 16.6  | 2630.2  |
| 306 | U | 4979 | 2.77 | 2450.1  | 37.2  | 4976 | 1.95 | 275.5  | 17.3  | 2174.7  |
| 307 | A | 4965 | 2.93 | 5144.6  | 58.4  | 4962 | 2.19 | 1119.4 | 15.2  | 4025.2  |
| 308 | C | 4949 | 2.59 | 2348.8  | 57.4  | 4946 | 1.95 | 215.1  | 18.0  | 2133.7  |
| 309 | C | 4936 | 3.68 | 5907.5  | 152.6 | 4934 | 3.00 | 1316.4 | 48.8  | 4591.2  |
| 310 | C | 4925 | 3.33 | 14161.3 | 338.7 | 4923 | 3.14 | 4342.2 | 57.8  | 9819.1  |
| 311 | A | 4912 | 2.96 | 8454.5  | 206.1 | 4909 | 3.09 | 2726.2 | 43.7  | 5728.3  |
| 312 | C | 4899 | 3.28 | 16593.2 | 124.3 | 4896 | 3.20 | 5724.4 | 31.4  | 10868.8 |
| 313 | A | 4886 | 3.38 | 5317.3  | 64.3  | 4884 | 3.15 | 1467.3 | 21.9  | 3849.9  |
| 314 | G | 4875 | 2.53 | 925.8   | 99.0  | 4873 | 2.25 | 310.3  | 27.1  | 615.5   |
| 315 | C | 4864 | 2.59 | 5176.2  | 54.8  | 4861 | 2.75 | 2188.4 | 39.0  | 2987.9  |
| 316 | A | 4851 | 3.23 | 7075.1  | 157.2 | 4847 | 3.15 | 2891.0 | 44.8  | 4184.0  |
| 317 | G | 4840 | 3.08 | 14984.8 | 266.7 | 4837 | 3.19 | 6207.6 | 55.5  | 8777.3  |
| 318 | U | 4829 | 3.15 | 30028.5 | 300.6 | 4826 | 3.19 | 6395.8 | 46.7  | 23632.7 |
| 319 | G | 4817 | 3.33 | 2830.4  | 164.9 | 4814 | 3.04 | 1322.5 | 38.6  | 1507.9  |
| 320 | C | 4804 | 2.65 | 6280.2  | 91.7  | 4801 | 2.80 | 2624.4 | 37.8  | 3655.8  |
| 321 | A | 4791 | 2.64 | 5044.2  | 83.3  | 4788 | 2.61 | 1717.1 | 25.7  | 3327.1  |
| 322 | U | 4779 | 3.15 | 5572.4  | 151.6 | 4777 | 3.15 | 2514.2 | 63.4  | 3058.1  |
| 323 | G | 4769 | 3.01 | 10352.9 | 243.7 | 4767 | 3.20 | 4866.7 | 46.6  | 5486.2  |
| 324 | A | 4758 | 2.53 | 2109.1  | 41.0  | 4755 | 2.00 | 913.4  | 39.7  | 1195.7  |
| 325 | U | 4748 | 2.53 | 497.8   | 50.9  | 4746 | 2.00 | 25.5   | 10.0  | 472.3   |
| 326 | G | 4738 | 2.94 | 4281.3  | 74.2  | 4735 | 3.06 | 892.4  | 38.7  | 3388.9  |
| 327 | A | 4726 | 2.96 | 11866.5 | 95.3  | 4723 | 2.82 | 2349.1 | 49.1  | 9517.4  |
| 328 | C | 4712 | 2.83 | 8367.7  | 151.9 | 4709 | 2.95 | 2858.5 | 61.5  | 5509.2  |
| 329 | C | 4699 | 3.16 | 18056.6 | 193.1 | 4695 | 3.11 | 5538.9 | 65.6  | 12517.7 |
| 330 | C | 4686 | 3.13 | 23447.7 | 201.0 | 4683 | 3.06 | 5427.4 | 66.3  | 18020.3 |
| 331 | A | 4675 | 3.08 | 14904.7 | 203.0 | 4671 | 2.28 | 1205.5 | 58.3  | 13699.2 |
| 332 | A | 4663 | 3.11 | 18703.5 | 170.1 | 4660 | 2.32 | 1953.1 | 37.9  | 16750.3 |
| 333 | A | 4651 | 2.98 | 21927.8 | 194.5 | 4648 | 2.14 | 1694.9 | 39.5  | 20232.9 |
| 334 | A | 4639 | 2.76 | 10341.7 | 164.5 | 4635 | 1.72 | 211.1  | 26.8  | 10130.6 |
| 335 | C | 4625 | 2.49 | 5415.8  | 151.7 | 4621 | 1.72 | 628.4  | 40.5  | 4787.4  |
| 336 | C | 4613 | 3.02 | 18374.8 | 216.7 | 4610 | 2.87 | 5041.7 | 54.8  | 13333.1 |

|     |   |      |      |         |       |      |      |         |       |         |
|-----|---|------|------|---------|-------|------|------|---------|-------|---------|
| 337 | A | 4601 | 2.98 | 20562.9 | 263.9 | 4598 | 2.48 | 2648.6  | 57.6  | 17914.3 |
| 338 | A | 4589 | 2.90 | 12434.6 | 167.1 | 4586 | 2.16 | 1169.1  | 30.9  | 11265.5 |
| 339 | G | 4578 | 2.83 | 7101.4  | 125.1 | 4574 | 1.72 | 96.6    | 28.3  | 7004.9  |
| 340 | C | 4566 | 2.60 | 7335.4  | 75.4  | 4563 | 2.34 | 2465.7  | 35.5  | 4869.7  |
| 341 | C | 4554 | 2.64 | 6920.2  | 89.5  | 4550 | 1.99 | 1404.7  | 45.6  | 5515.5  |
| 342 | A | 4542 | 2.52 | 5967.3  | 95.3  | 4538 | 1.72 | 483.1   | 25.2  | 5484.2  |
| 343 | A | 4529 | 2.56 | 5963.6  | 84.5  | 4525 | 1.88 | 656.7   | 24.7  | 5306.9  |
| 344 | U | 4518 | 2.76 | 9527.9  | 101.0 | 4515 | 2.27 | 1446.7  | 36.1  | 8081.2  |
| 345 | C | 4506 | 2.35 | 2646.7  | 145.8 | 4502 | 3.07 | 615.9   | 38.3  | 2030.8  |
| 346 | C | 4493 | 2.96 | 17628.3 | 170.7 | 4490 | 2.95 | 4216.9  | 37.9  | 13411.5 |
| 347 | A | 4481 | 2.85 | 9688.1  | 123.9 | 4477 | 2.54 | 1563.6  | 48.0  | 8124.4  |
| 348 | U | 4469 | 2.53 | 6650.2  | 129.5 | 4465 | 1.79 | 626.4   | 30.9  | 6023.8  |
| 349 | C | 4455 | 2.90 | 11586.9 | 168.7 | 4452 | 3.02 | 3513.3  | 67.0  | 8073.5  |
| 350 | U | 4443 | 2.98 | 20464.2 | 178.1 | 4440 | 3.14 | 5921.2  | 46.5  | 14543.0 |
| 351 | G | 4433 | 2.35 | 2036.9  | 112.1 | 4429 | 2.82 | 1161.3  | 25.4  | 875.6   |
| 352 | G | 4423 | 2.35 | 1082.6  | 70.8  | 4419 | 2.94 | 943.4   | 23.0  | 139.2   |
| 353 | U | 4411 | 2.65 | 5137.9  | 83.8  | 4408 | 2.77 | 2325.9  | 47.7  | 2812.0  |
| 354 | U | 4400 | 2.90 | 5061.0  | 108.5 | 4398 | 3.34 | 1900.8  | 111.0 | 3160.2  |
| 355 | G | 4390 | 2.35 | 5620.0  | 256.7 | 4387 | 3.55 | 5472.8  | 128.3 | 147.1   |
| 356 | G | 4381 | 3.30 | 34011.8 | 187.4 | 4377 | 3.59 | 18093.6 | 169.0 | 15918.2 |
| 357 | U | 4370 | 3.16 | 13968.9 | 242.6 | 4365 | 3.32 | 5060.6  | 210.8 | 8908.3  |
| 358 | C | 4357 | 2.82 | 13231.4 | 205.7 | 4353 | 2.94 | 4195.1  | 95.1  | 9036.3  |
| 359 | A | 4346 | 3.16 | 26584.2 | 326.1 | 4342 | 3.19 | 5575.6  | 51.0  | 21008.5 |
| 360 | U | 4335 | 3.30 | 21421.0 | 216.9 | 4331 | 2.96 | 4911.1  | 72.6  | 16509.8 |
| 361 | U | 4323 | 2.35 | 1813.7  | 143.6 | 4319 | 1.79 | 399.4   | 28.0  | 1414.3  |
| 362 | U | 4313 | 2.70 | 6061.6  | 103.7 | 4309 | 2.03 | 563.9   | 17.5  | 5497.6  |
| 363 | U | 4301 | 2.50 | 3929.6  | 115.0 | 4297 | 1.79 | 420.4   | 20.4  | 3509.2  |
| 364 | A | 4289 | 2.35 | 4805.2  | 81.1  | 4285 | 1.79 | 923.0   | 20.9  | 3882.2  |
| 365 | C | 4279 | 4.50 | 1493.2  | 264.0 | 4275 | 4.64 | 285.1   | 63.5  | 1208.0  |
| 366 | G | 4269 | 4.18 | 6230.1  | 130.2 | 4265 | 3.94 | 2665.3  | 28.8  | 3564.8  |
| 367 | G | 4260 | 2.97 | 5191.5  | 105.4 | 4255 | 2.50 | 924.4   | 57.6  | 4267.1  |
| 368 | A | 4249 | 2.37 | 1685.3  | 77.9  | 4245 | 1.79 | 31.9    | 22.9  | 1653.4  |
| 369 | C | 4237 | 2.83 | 6899.6  | 85.5  | 4234 | 2.39 | 1552.8  | 22.9  | 5346.8  |
| 370 | A | 4225 | 2.70 | 6657.6  | 85.3  | 4221 | 1.79 | 311.8   | 31.2  | 6345.8  |
| 371 | C | 4211 | 2.75 | 6444.7  | 112.4 | 4206 | 2.39 | 1170.5  | 30.3  | 5274.3  |
| 372 | C | 4199 | 2.69 | 3017.0  | 112.0 | 4194 | 1.79 | 218.6   | 46.5  | 2798.4  |
| 373 | C | 4187 | 2.82 | 9526.2  | 201.1 | 4182 | 2.84 | 2741.3  | 55.3  | 6784.8  |
| 374 | A | 4176 | 3.10 | 17504.7 | 130.1 | 4172 | 2.79 | 2623.9  | 40.1  | 14880.8 |
| 375 | U | 4165 | 2.90 | 11442.9 | 161.6 | 4161 | 3.21 | 2171.8  | 53.4  | 9271.1  |
| 376 | C | 4152 | 3.00 | 14569.7 | 204.4 | 4148 | 3.21 | 5717.7  | 71.7  | 8852.1  |
| 377 | U | 4141 | 3.18 | 26232.5 | 132.2 | 4138 | 3.41 | 9254.0  | 108.3 | 16978.5 |
| 378 | A | 4129 | 2.84 | 23559.9 | 282.3 | 4125 | 2.58 | 7008.7  | 181.9 | 16551.3 |
| 379 | U | 4119 | 3.22 | 30774.5 | 446.3 | 4116 | 3.48 | 11351.9 | 182.9 | 19422.6 |
| 380 | G | 4109 | 3.34 | 14233.9 | 497.9 | 4106 | 3.67 | 2513.4  | 129.0 | 11720.4 |
| 381 | A | 4099 | 2.37 | 6410.9  | 162.7 | 4095 | 2.08 | 1315.1  | 47.1  | 5095.8  |
| 382 | U | 4086 | 2.40 | 5522.0  | 124.5 | 4082 | 1.91 | 334.8   | 24.7  | 5187.2  |
| 383 | U | 4076 | 2.37 | 1811.7  | 117.3 | 4073 | 2.02 | 679.7   | 46.4  | 1132.0  |
| 384 | C | 4063 | 2.37 | 6031.4  | 214.7 | 4060 | 2.88 | 4055.9  | 56.1  | 1975.4  |

|     |   |      |      |         |       |      |      |        |       |         |
|-----|---|------|------|---------|-------|------|------|--------|-------|---------|
| 385 | C | 4052 | 2.37 | 3854.3  | 148.6 | 4052 | 2.43 | 1497.1 | 70.7  | 2357.3  |
| 386 | G | 4048 | 4.57 | 17098.6 | 329.2 | 4044 | 4.31 | 8413.3 | 113.9 | 8685.4  |
| 387 | U | 4035 | 4.57 | 2864.4  | 356.9 | 4032 | 4.31 | 957.5  | 128.3 | 1906.9  |
| 388 | A | 4024 | 2.61 | 9028.8  | 122.7 | 4020 | 2.80 | 2785.4 | 40.8  | 6243.4  |
| 389 | U | 4015 | 3.07 | 14542.3 | 203.2 | 4012 | 2.90 | 2325.8 | 48.3  | 12216.5 |
| 390 | A | 4004 | 3.12 | 2864.8  | 152.5 | 4001 | 1.74 | 0.0    | 43.6  | 2864.8  |
| 391 | C | 3992 | 2.68 | 5064.9  | 93.8  | 3989 | 2.76 | 2439.5 | 48.7  | 2625.4  |
| 392 | A | 3982 | 2.84 | 12547.3 | 155.3 | 3979 | 2.71 | 2342.8 | 61.7  | 10204.5 |
| 393 | C | 3969 | 2.37 | 3047.2  | 180.5 | 3965 | 2.17 | 1440.4 | 50.1  | 1606.9  |
| 394 | C | 3957 | 2.39 | 4068.9  | 190.1 | 3952 | 2.95 | 1750.0 | 28.5  | 2318.9  |
| 395 | U | 3947 | 2.97 | 5551.6  | 116.8 | 3942 | 2.95 | 886.1  | 31.2  | 4665.5  |
| 396 | U | 3937 | 2.99 | 12808.1 | 109.6 | 3933 | 2.71 | 2242.8 | 45.5  | 10565.3 |
| 397 | A | 3925 | 2.97 | 16068.4 | 183.9 | 3922 | 2.66 | 2193.3 | 42.6  | 13875.1 |
| 398 | U | 3915 | 2.95 | 9650.7  | 172.0 | 3910 | 2.11 | 1269.0 | 63.3  | 8381.7  |
| 399 | C | 3902 | 2.94 | 11339.6 | 168.2 | 3899 | 1.91 | 1229.6 | 42.5  | 10110.0 |
| 400 | A | 3892 | 3.03 | 10926.5 | 208.1 | 3888 | 1.74 | 0.0    | 31.3  | 10926.5 |
| 401 | A | 3880 | 3.16 | 16291.7 | 104.7 | 3876 | 1.74 | 1843.2 | 41.7  | 14448.5 |
| 402 | A | 3869 | 3.20 | 8447.6  | 80.5  | 3869 | 1.40 | 0.0    | 11.7  | 8447.6  |
| 403 | U | 3858 | 3.61 | 6631.7  | 192.8 | 3862 | 1.40 | 0.0    | 4.9   | 6631.7  |
| 404 | G | 3848 | 4.45 | 3658.0  | 98.9  | 3848 | 1.40 | 165.9  | 5.5   | 3492.1  |
| 405 | U | 3838 | 3.49 | 1326.1  | 132.3 | 3836 | 1.40 | 0.0    | 25.5  | 1326.1  |
| 406 | C | 3828 | 3.85 | 6428.3  | 64.9  | 3824 | 3.75 | 2918.4 | 75.9  | 3509.9  |
| 407 | G | 3818 | 2.85 | 2332.7  | 112.7 | 3813 | 4.44 | 971.5  | 75.1  | 1361.2  |
| 408 | C | 3807 | 2.00 | 348.6   | 38.8  | 3802 | 1.71 | 418.0  | 28.1  | -69.4   |
| 409 | C | 3794 | 2.28 | 1200.6  | 35.5  | 3789 | 3.20 | 999.2  | 27.0  | 201.3   |
| 410 | U | 3784 | 3.23 | 4420.4  | 51.2  | 3779 | 3.06 | 2558.9 | 49.9  | 1861.5  |
| 411 | A | 3773 | 3.05 | 6937.3  | 65.9  | 3769 | 3.15 | 2987.5 | 50.1  | 3949.8  |
| 412 | U | 3765 | 3.35 | 2235.5  | 123.4 | 3760 | 3.75 | 951.1  | 38.1  | 1284.5  |
| 413 | G | 3756 | 3.28 | 3320.7  | 103.0 | 3753 | 3.60 | 1515.0 | 38.1  | 1805.7  |
| 414 | U | 3748 | 3.32 | 5707.5  | 93.7  | 3743 | 3.44 | 2121.0 | 26.5  | 3586.5  |
| 415 | A | 3737 | 3.42 | 6556.3  | 84.5  | 3732 | 3.55 | 2435.8 | 21.0  | 4120.5  |
| 416 | C | 3727 | 2.87 | 2125.2  | 87.1  | 3727 | 1.40 | 88.0   | 26.9  | 2037.1  |
| 417 | U | 3717 | 3.38 | 5483.9  | 108.2 | 3720 | 5.20 | 1815.2 | 70.5  | 3668.7  |
| 418 | U | 3707 | 3.42 | 11097.0 | 96.9  | 3704 | 5.20 | 3628.1 | 106.2 | 7468.9  |
| 419 | U | 3697 | 3.60 | 4987.7  | 62.2  | 3693 | 4.45 | 2110.7 | 74.9  | 2877.1  |
| 420 | C | 3686 | 2.93 | 1332.8  | 64.0  | 3682 | 3.64 | 1026.5 | 29.1  | 306.3   |
| 421 | C | 3676 | 3.30 | 5053.7  | 34.7  | 3671 | 3.73 | 3742.9 | 41.2  | 1310.8  |
| 422 | A | 3664 | 3.12 | 1194.3  | 45.4  | 3659 | 2.94 | 827.7  | 39.9  | 366.5   |
| 423 | C | 3651 | 2.00 | 280.1   | 13.4  | 3646 | 2.82 | 305.6  | 24.4  | -25.5   |
| 424 | C | 3640 | 2.06 | 649.7   | 19.7  | 3640 | 1.40 | 3.3    | 22.6  | 646.4   |
| 425 | U | 3630 | 5.05 | 810.0   | 21.6  | 3633 | 4.80 | 938.0  | 61.4  | -128.0  |
| 426 | G | 3618 | 4.27 | 802.6   | 58.5  | 3621 | 5.42 | 1237.6 | 62.8  | -435.0  |

### SHAPE\_example\_3\_peaks.txt

| seqnum | seq | RX.pos | RX.sigma | RX.area | RX.rms | BG.pos | BG.sigma | BG.area | BG.rms | (RX.area-BG.area) |
|--------|-----|--------|----------|---------|--------|--------|----------|---------|--------|-------------------|
| 6      | G   | 9336   | 4.12     | 1832.5  | 54.8   | 9332   | 2.80     | 0.0     | 0.0    | 1832.5            |
| 7      | A   | 9323   | 4.30     | 6934.4  | 70.2   | 9319   | 4.30     | 2598.7  | 37.7   | 4335.7            |
| 8      | A   | 9306   | 3.95     | 482.2   | 87.4   | 9304   | 4.90     | 204.9   | 29.7   | 277.4             |
| 9      | C   | 9289   | 4.70     | 7237.2  | 126.9  | 9285   | 4.75     | 2534.1  | 32.5   | 4703.1            |
| 10     | U   | 9274   | 4.44     | 12909.8 | 153.2  | 9271   | 5.29     | 4937.0  | 65.1   | 7972.8            |
| 11     | U   | 9256   | 3.95     | 130.2   | 89.4   | 9250   | 5.09     | 5.7     | 40.2   | 124.5             |
| 12     | C   | 9240   | 4.90     | 11496.2 | 144.4  | 9235   | 4.22     | 2940.2  | 53.3   | 8555.9            |
| 13     | U   | 9225   | 4.97     | 25924.5 | 238.6  | 9221   | 5.69     | 7175.6  | 84.6   | 18748.9           |
| 14     | A   | 9209   | 4.95     | 13952.9 | 199.8  | 9204   | 4.94     | 2138.3  | 100.4  | 11814.6           |
| 15     | G   | 9194   | 4.75     | 3354.0  | 126.5  | 9188   | 2.05     | 8.5     | 30.4   | 3345.5            |
| 16     | U   | 9178   | 4.50     | 5542.7  | 75.1   | 9172   | 3.81     | 1466.2  | 35.6   | 4076.5            |
| 17     | A   | 9162   | 4.34     | 5546.4  | 67.0   | 9158   | 4.30     | 2027.9  | 50.4   | 3518.5            |
| 18     | U   | 9144   | 3.95     | 243.2   | 60.5   | 9138   | 5.25     | 187.6   | 40.8   | 55.7              |
| 19     | A   | 9130   | 3.99     | 3250.4  | 74.9   | 9125   | 2.25     | 706.8   | 31.3   | 2543.6            |
| 20     | U   | 9112   | 3.95     | 3260.3  | 89.3   | 9109   | 2.05     | 0.0     | 6.8    | 3260.3            |
| 21     | U   | 9097   | 5.09     | 14482.9 | 300.7  | 9093   | 2.05     | 0.0     | 29.3   | 14482.9           |
| 22     | C   | 9079   | 5.20     | 17757.9 | 192.4  | 9076   | 5.80     | 3460.7  | 162.1  | 14297.1           |
| 23     | U   | 9064   | 5.11     | 21631.2 | 195.2  | 9060   | 6.70     | 7861.3  | 145.6  | 13769.9           |
| 24     | G   | 9051   | 5.21     | 19856.4 | 176.7  | 9046   | 5.90     | 6799.5  | 59.6   | 13056.8           |
| 25     | U   | 9036   | 5.30     | 10668.4 | 175.3  | 9032   | 6.70     | 5384.3  | 128.2  | 5284.1            |
| 26     | A   | 9020   | 6.70     | 2656.4  | 125.9  | 9016   | 6.70     | 1965.9  | 94.0   | 690.6             |
| 27     | U   | 9004   | 4.80     | 7726.0  | 163.6  | 9000   | 6.70     | 7262.1  | 104.3  | 464.0             |
| 28     | A   | 8990   | 3.89     | 4727.7  | 83.6   | 8983   | 6.60     | 5273.7  | 143.6  | -546.0            |
| 29     | C   | 8972   | 2.70     | 43.6    | 81.2   | 8965   | 5.01     | 2622.3  | 77.7   | -2578.6           |
| 30     | C   | 8954   | 4.36     | 13167.6 | 99.2   | 8951   | 5.00     | 4660.6  | 48.5   | 8507.0            |
| 31     | U   | 8938   | 4.80     | 10147.0 | 177.5  | 8934   | 4.35     | 1919.6  | 53.1   | 8227.3            |
| 32     | A   | 8922   | 4.80     | 24476.4 | 188.4  | 8919   | 3.93     | 2234.0  | 44.9   | 22242.4           |
| 33     | A   | 8906   | 4.85     | 13780.1 | 166.1  | 8901   | 2.55     | 452.2   | 35.6   | 13328.0           |
| 34     | U   | 8890   | 4.95     | 15965.1 | 198.2  | 8887   | 3.36     | 2639.8  | 61.0   | 13325.3           |
| 35     | A   | 8874   | 4.94     | 32994.4 | 241.1  | 8872   | 2.62     | 1515.0  | 47.5   | 31479.4           |
| 36     | U   | 8858   | 4.95     | 19503.8 | 231.7  | 8856   | 2.55     | 0.0     | 35.6   | 19503.8           |
| 37     | U   | 8843   | 4.99     | 38628.0 | 354.1  | 8839   | 2.55     | 963.6   | 30.3   | 37664.4           |
| 38     | A   | 8826   | 4.90     | 16919.6 | 276.7  | 8822   | 2.70     | 1467.0  | 22.6   | 15452.6           |
| 39     | U   | 8811   | 3.96     | 7099.4  | 86.9   | 8808   | 2.55     | 0.0     | 17.2   | 7099.4            |
| 40     | A   | 8796   | 4.25     | 4265.8  | 76.9   | 8793   | 3.62     | 1195.9  | 27.7   | 3069.9            |
| 41     | G   | 8780   | 3.19     | 1164.4  | 70.2   | 8777   | 4.16     | 612.2   | 17.4   | 552.2             |
| 42     | C   | 8765   | 2.70     | 705.5   | 49.5   | 8759   | 2.55     | 199.1   | 19.2   | 506.4             |
| 43     | C   | 8748   | 3.32     | 1873.8  | 50.5   | 8744   | 2.95     | 691.1   | 22.8   | 1182.8            |
| 44     | U   | 8733   | 2.70     | 740.7   | 54.8   | 8732   | 2.95     | 94.7    | 13.5   | 646.0             |
| 45     | U   | 8717   | 5.00     | 5113.1  | 220.7  | 8716   | 4.75     | 72.0    | 23.2   | 5041.0            |
| 46     | U   | 8702   | 4.90     | 28767.7 | 244.0  | 8699   | 4.50     | 3508.8  | 37.8   | 25258.9           |
| 47     | A   | 8686   | 4.89     | 23868.9 | 244.7  | 8683   | 4.41     | 3168.2  | 66.6   | 20700.8           |
| 48     | U   | 8667   | 5.25     | 23519.3 | 288.2  | 8665   | 6.29     | 3925.6  | 214.8  | 19593.7           |

|    |   |      |      |         |       |      |      |         |       |         |
|----|---|------|------|---------|-------|------|------|---------|-------|---------|
| 49 | C | 8651 | 5.45 | 45741.1 | 424.9 | 8647 | 6.08 | 14666.0 | 174.0 | 31075.0 |
| 50 | A | 8637 | 5.38 | 35217.9 | 408.6 | 8634 | 4.73 | 7460.3  | 117.1 | 27757.6 |
| 51 | A | 8621 | 5.09 | 26353.7 | 331.0 | 8618 | 5.45 | 6082.3  | 134.2 | 20271.4 |
| 52 | C | 8604 | 4.53 | 12641.4 | 131.4 | 8600 | 3.88 | 2345.3  | 55.3  | 10296.1 |
| 53 | A | 8587 | 4.90 | 18419.6 | 142.6 | 8584 | 3.91 | 2077.6  | 32.4  | 16342.1 |
| 54 | A | 8570 | 4.85 | 11250.0 | 152.3 | 8568 | 5.15 | 1668.7  | 65.0  | 9581.3  |
| 55 | U | 8555 | 4.87 | 14746.8 | 119.5 | 8552 | 5.58 | 3394.1  | 78.2  | 11352.7 |
| 56 | G | 8542 | 4.95 | 7478.5  | 89.0  | 8542 | 6.00 | 3056.3  | 72.6  | 4422.2  |
| 57 | G | 8528 | 4.41 | 2326.6  | 75.6  | 8526 | 6.40 | 968.3   | 48.7  | 1358.3  |
| 58 | A | 8511 | 5.60 | 1162.7  | 93.9  | 8512 | 4.25 | 663.2   | 19.4  | 499.4   |
| 59 | A | 8495 | 2.45 | 138.9   | 34.1  | 8495 | 1.80 | 333.6   | 17.1  | -194.7  |
| 60 | U | 8479 | 4.05 | 379.9   | 50.6  | 8479 | 4.75 | 415.4   | 28.9  | -35.4   |
| 61 | C | 8465 | 3.41 | 3571.3  | 99.7  | 8463 | 4.49 | 2137.6  | 25.1  | 1433.6  |
| 62 | C | 8447 | 3.35 | 2364.4  | 129.1 | 8447 | 4.16 | 1689.1  | 45.1  | 675.3   |
| 63 | C | 8433 | 4.90 | 13916.8 | 213.3 | 8431 | 5.40 | 6527.6  | 107.4 | 7389.3  |
| 64 | A | 8417 | 4.59 | 25200.7 | 257.3 | 8414 | 4.86 | 4703.8  | 109.1 | 20496.9 |
| 65 | A | 8402 | 4.44 | 17398.6 | 181.5 | 8399 | 4.18 | 3341.7  | 56.7  | 14056.9 |
| 66 | C | 8385 | 4.90 | 15975.7 | 203.2 | 8383 | 4.95 | 6707.7  | 76.9  | 9268.0  |
| 67 | A | 8369 | 4.90 | 27224.8 | 232.2 | 8366 | 5.15 | 4952.7  | 87.7  | 22272.1 |
| 68 | A | 8353 | 4.75 | 29680.0 | 180.4 | 8351 | 4.62 | 5761.4  | 44.1  | 23918.6 |
| 69 | U | 8338 | 4.65 | 13134.0 | 110.1 | 8336 | 5.10 | 1473.4  | 72.1  | 11660.6 |
| 70 | U | 8324 | 4.80 | 30900.0 | 205.5 | 8321 | 5.26 | 5641.7  | 79.3  | 25258.4 |
| 71 | A | 8308 | 4.88 | 14255.8 | 207.6 | 8306 | 3.61 | 1840.0  | 28.8  | 12415.8 |
| 72 | U | 8293 | 3.83 | 6310.1  | 73.9  | 8290 | 3.89 | 666.7   | 25.4  | 5643.4  |
| 73 | C | 8277 | 3.37 | 2870.8  | 77.7  | 8274 | 3.19 | 1293.7  | 21.0  | 1577.1  |
| 74 | U | 8261 | 2.63 | 1398.6  | 93.7  | 8258 | 2.19 | 410.5   | 26.0  | 988.1   |
| 75 | C | 8244 | 4.43 | 7066.5  | 96.7  | 8243 | 4.95 | 2143.4  | 52.5  | 4923.0  |
| 76 | A | 8230 | 4.48 | 19132.5 | 90.1  | 8227 | 4.58 | 2941.4  | 63.2  | 16191.1 |
| 77 | A | 8215 | 4.48 | 11891.5 | 69.8  | 8212 | 3.09 | 1226.9  | 28.5  | 10664.6 |
| 78 | C | 8198 | 3.70 | 4355.0  | 90.1  | 8196 | 4.14 | 1985.9  | 29.1  | 2369.2  |
| 79 | A | 8183 | 3.82 | 5448.6  | 67.3  | 8180 | 4.34 | 2399.8  | 26.8  | 3048.8  |
| 80 | U | 8166 | 4.01 | 1379.8  | 62.7  | 8165 | 3.89 | 733.5   | 29.0  | 646.3   |
| 81 | U | 8153 | 2.63 | 493.2   | 62.6  | 8150 | 2.19 | 58.2    | 17.6  | 435.0   |
| 82 | C | 8137 | 3.72 | 3687.5  | 55.4  | 8135 | 2.34 | 450.9   | 12.6  | 3236.6  |
| 83 | A | 8122 | 3.91 | 7522.1  | 85.1  | 8119 | 2.19 | 71.7    | 15.8  | 7450.4  |
| 84 | C | 8104 | 4.29 | 6386.9  | 116.3 | 8101 | 2.52 | 810.3   | 37.3  | 5576.6  |
| 85 | C | 8088 | 4.43 | 13938.7 | 137.5 | 8085 | 4.39 | 3233.7  | 46.6  | 10705.0 |
| 86 | C | 8072 | 4.43 | 23096.8 | 105.7 | 8070 | 4.58 | 6014.9  | 63.4  | 17081.9 |
| 87 | A | 8057 | 4.43 | 22943.7 | 124.3 | 8054 | 4.51 | 2243.9  | 73.7  | 20699.8 |
| 88 | A | 8042 | 4.15 | 7969.1  | 104.3 | 8039 | 2.82 | 1135.7  | 28.4  | 6833.4  |
| 89 | U | 8026 | 4.01 | 5571.7  | 108.0 | 8021 | 2.99 | 332.5   | 32.5  | 5239.3  |
| 90 | U | 8010 | 3.44 | 5561.5  | 147.1 | 8009 | 3.08 | 922.0   | 33.5  | 4639.4  |
| 91 | C | 7994 | 2.63 | 2126.2  | 68.9  | 7992 | 3.74 | 1614.0  | 20.7  | 512.2   |
| 92 | U | 7978 | 2.73 | 2048.7  | 60.9  | 7976 | 3.42 | 1228.8  | 32.5  | 819.8   |
| 93 | C | 7963 | 3.57 | 5417.4  | 145.4 | 7961 | 3.54 | 1479.9  | 40.4  | 3937.5  |
| 94 | A | 7946 | 4.28 | 14324.2 | 79.1  | 7943 | 4.24 | 2690.6  | 24.1  | 11633.6 |
| 95 | U | 7930 | 4.35 | 9721.5  | 82.4  | 7928 | 4.34 | 2900.2  | 29.6  | 6821.3  |
| 96 | G | 7915 | 3.15 | 1605.0  | 75.5  | 7914 | 3.57 | 752.1   | 25.8  | 853.0   |

|     |   |      |      |         |       |      |      |        |      |         |
|-----|---|------|------|---------|-------|------|------|--------|------|---------|
| 97  | G | 7899 | 3.15 | 830.4   | 69.4  | 7897 | 3.60 | 342.9  | 22.6 | 487.5   |
| 98  | U | 7884 | 3.58 | 5071.9  | 87.1  | 7882 | 3.89 | 2452.4 | 27.5 | 2619.4  |
| 99  | A | 7867 | 3.55 | 3344.2  | 117.8 | 7864 | 3.91 | 1686.6 | 34.0 | 1657.5  |
| 100 | G | 7853 | 4.00 | 3.4     | 90.5  | 7851 | 3.29 | 0.0    | 27.4 | 3.4     |
| 101 | C | 7842 | 4.15 | 3970.6  | 74.4  | 7837 | 4.04 | 1008.3 | 20.7 | 2962.3  |
| 102 | G | 7828 | 3.91 | 3422.5  | 74.9  | 7823 | 3.29 | 323.4  | 27.0 | 3099.2  |
| 103 | C | 7810 | 4.00 | 4010.8  | 83.5  | 7808 | 3.93 | 1319.3 | 34.4 | 2691.5  |
| 104 | C | 7794 | 3.77 | 8454.5  | 124.9 | 7792 | 3.83 | 2288.0 | 37.7 | 6166.5  |
| 105 | U | 7778 | 3.15 | 2117.1  | 71.3  | 7777 | 3.29 | 868.0  | 31.4 | 1249.1  |
| 106 | G | 7764 | 3.15 | 1404.4  | 97.7  | 7764 | 4.54 | 309.9  | 38.1 | 1094.4  |
| 107 | U | 7750 | 3.96 | 12595.8 | 84.5  | 7747 | 4.14 | 3084.6 | 39.2 | 9511.2  |
| 108 | G | 7737 | 3.90 | 6023.7  | 87.0  | 7734 | 4.29 | 2128.2 | 38.2 | 3895.5  |
| 109 | C | 7721 | 3.35 | 4625.9  | 105.2 | 7718 | 4.00 | 2434.3 | 45.5 | 2191.6  |
| 110 | U | 7706 | 3.52 | 4086.9  | 104.4 | 7703 | 3.96 | 2073.3 | 49.8 | 2013.6  |
| 111 | U | 7691 | 3.90 | 11399.1 | 113.7 | 7687 | 4.10 | 2121.2 | 40.6 | 9278.0  |
| 112 | C | 7674 | 3.96 | 11825.0 | 150.1 | 7671 | 3.99 | 3216.2 | 33.0 | 8608.8  |
| 113 | G | 7660 | 4.00 | 3939.6  | 110.5 | 7657 | 3.58 | 1296.8 | 45.4 | 2642.8  |
| 114 | G | 7643 | 4.35 | 1514.1  | 135.0 | 7640 | 3.29 | 767.7  | 55.7 | 746.3   |
| 115 | U | 7628 | 4.15 | 16869.0 | 146.2 | 7625 | 4.57 | 3736.2 | 41.7 | 13132.8 |
| 116 | U | 7614 | 4.05 | 19381.0 | 91.6  | 7611 | 4.28 | 5453.1 | 46.1 | 13927.9 |
| 117 | A | 7600 | 3.15 | 397.5   | 78.5  | 7595 | 3.29 | 266.1  | 26.5 | 131.4   |
| 118 | C | 7586 | 3.15 | 1261.7  | 60.2  | 7583 | 4.14 | 1123.5 | 23.4 | 138.2   |
| 119 | U | 7573 | 3.45 | 3842.9  | 66.2  | 7570 | 4.24 | 2323.7 | 20.5 | 1519.2  |
| 120 | U | 7557 | 2.90 | 1336.8  | 60.3  | 7555 | 3.82 | 934.1  | 19.2 | 402.7   |
| 121 | C | 7541 | 2.90 | 240.9   | 48.4  | 7536 | 4.76 | 385.6  | 33.9 | -144.7  |
| 122 | U | 7526 | 4.66 | 8007.5  | 220.9 | 7522 | 4.63 | 2566.1 | 39.9 | 5441.4  |
| 123 | A | 7509 | 4.45 | 22171.4 | 280.9 | 7507 | 4.48 | 4515.9 | 30.0 | 17655.6 |
| 124 | A | 7494 | 4.13 | 40854.9 | 237.8 | 7492 | 4.18 | 3377.7 | 36.6 | 37477.3 |
| 125 | G | 7481 | 3.98 | 11633.8 | 110.1 | 7478 | 4.43 | 912.6  | 44.4 | 10721.2 |
| 126 | G | 7468 | 4.13 | 12670.2 | 118.6 | 7465 | 4.53 | 3721.5 | 36.0 | 8948.7  |
| 127 | A | 7454 | 4.28 | 3773.5  | 92.3  | 7450 | 3.33 | 1133.9 | 39.8 | 2639.7  |
| 128 | A | 7439 | 4.30 | 948.4   | 73.9  | 7436 | 3.33 | 228.3  | 36.3 | 720.1   |
| 129 | G | 7424 | 4.00 | 6360.3  | 56.2  | 7422 | 3.95 | 2220.4 | 25.4 | 4139.9  |
| 130 | U | 7410 | 3.40 | 1817.0  | 63.9  | 7409 | 3.33 | 236.8  | 22.0 | 1580.2  |
| 131 | C | 7395 | 2.90 | 1425.6  | 55.4  | 7390 | 3.33 | 380.4  | 16.6 | 1045.2  |
| 132 | C | 7379 | 3.14 | 4352.7  | 58.3  | 7377 | 3.33 | 1992.6 | 23.5 | 2360.1  |
| 133 | A | 7364 | 2.90 | 921.8   | 68.8  | 7360 | 3.33 | 365.8  | 26.2 | 556.0   |
| 134 | C | 7348 | 3.20 | 5299.3  | 76.3  | 7345 | 3.88 | 3057.2 | 22.9 | 2242.2  |
| 135 | A | 7332 | 3.26 | 3136.3  | 56.5  | 7329 | 3.73 | 1570.5 | 20.7 | 1565.8  |
| 136 | C | 7316 | 3.44 | 6639.6  | 58.7  | 7314 | 3.90 | 2833.0 | 25.5 | 3806.6  |
| 137 | A | 7302 | 3.66 | 8039.0  | 120.2 | 7298 | 3.99 | 1735.0 | 36.0 | 6304.0  |
| 138 | A | 7287 | 4.13 | 19936.2 | 194.4 | 7284 | 4.09 | 4236.3 | 42.8 | 15699.8 |
| 139 | A | 7271 | 4.13 | 28646.6 | 191.7 | 7269 | 4.18 | 4583.3 | 36.9 | 24063.3 |
| 140 | U | 7256 | 3.63 | 7519.9  | 75.2  | 7252 | 4.33 | 1301.8 | 41.4 | 6218.1  |
| 141 | C | 7241 | 4.05 | 18962.1 | 101.7 | 7238 | 4.58 | 5551.1 | 53.6 | 13411.0 |
| 142 | A | 7226 | 4.08 | 41188.9 | 140.0 | 7223 | 4.00 | 8574.8 | 89.8 | 32614.1 |
| 143 | A | 7211 | 4.08 | 23661.5 | 150.3 | 7209 | 3.49 | 2231.1 | 28.4 | 21430.4 |
| 144 | G | 7197 | 3.24 | 4841.5  | 124.1 | 7196 | 3.58 | 192.0  | 20.3 | 4649.5  |

|     |   |      |      |         |       |      |      |        |      |         |
|-----|---|------|------|---------|-------|------|------|--------|------|---------|
| 145 | A | 7181 | 2.70 | 3102.5  | 90.6  | 7176 | 2.16 | 164.0  | 18.1 | 2938.4  |
| 146 | U | 7166 | 2.88 | 5572.4  | 89.2  | 7163 | 2.36 | 969.5  | 24.0 | 4602.9  |
| 147 | C | 7152 | 2.70 | 2322.5  | 88.2  | 7149 | 2.16 | 531.5  | 36.0 | 1791.1  |
| 148 | C | 7137 | 3.13 | 5246.5  | 75.4  | 7134 | 2.91 | 1686.8 | 28.7 | 3559.7  |
| 149 | G | 7122 | 2.70 | 3460.1  | 78.0  | 7120 | 3.91 | 474.3  | 57.4 | 2985.8  |
| 150 | U | 7109 | 4.11 | 22843.9 | 207.8 | 7106 | 3.92 | 4121.8 | 41.7 | 18722.1 |
| 151 | U | 7094 | 4.01 | 18671.5 | 197.2 | 7092 | 3.24 | 1053.8 | 28.5 | 17617.8 |
| 152 | A | 7079 | 3.59 | 12671.6 | 75.4  | 7077 | 4.51 | 169.7  | 36.2 | 12501.9 |
| 153 | G | 7066 | 4.01 | 32406.1 | 212.3 | 7063 | 3.77 | 4005.4 | 54.2 | 28400.7 |
| 154 | A | 7051 | 4.13 | 17253.9 | 187.4 | 7049 | 2.22 | 834.1  | 33.8 | 16419.9 |
| 155 | C | 7035 | 3.62 | 10718.9 | 113.5 | 7033 | 3.96 | 2855.2 | 35.8 | 7863.7  |
| 156 | G | 7022 | 3.53 | 4703.9  | 55.0  | 7019 | 3.96 | 1434.4 | 25.8 | 3269.5  |
| 157 | U | 7008 | 3.45 | 5237.9  | 60.7  | 7005 | 3.91 | 1169.4 | 25.9 | 4068.5  |
| 158 | U | 6995 | 3.78 | 8841.2  | 126.5 | 6992 | 3.82 | 2217.6 | 27.0 | 6623.7  |
| 159 | U | 6979 | 4.18 | 1824.0  | 88.2  | 6977 | 4.25 | 160.3  | 39.6 | 1663.7  |
| 160 | C | 6964 | 3.96 | 22989.9 | 103.9 | 6962 | 3.96 | 5357.3 | 51.5 | 17632.5 |
| 161 | A | 6950 | 3.87 | 14097.4 | 71.1  | 6949 | 3.73 | 2337.8 | 40.5 | 11759.6 |
| 162 | G | 6935 | 2.70 | 1315.7  | 66.3  | 6935 | 4.31 | 48.6   | 18.1 | 1267.1  |
| 163 | C | 6923 | 2.82 | 781.3   | 53.4  | 6919 | 2.16 | 98.6   | 11.4 | 682.7   |
| 164 | U | 6909 | 2.70 | 1294.5  | 60.4  | 6905 | 2.16 | 472.4  | 25.6 | 822.1   |
| 165 | U | 6894 | 2.70 | 2240.2  | 56.0  | 6891 | 3.11 | 816.4  | 28.5 | 1423.8  |
| 166 | C | 6879 | 3.20 | 3772.1  | 76.6  | 6876 | 3.92 | 1896.2 | 35.6 | 1875.9  |
| 167 | C | 6864 | 3.48 | 7594.4  | 89.3  | 6861 | 3.91 | 3623.0 | 31.6 | 3971.4  |
| 168 | A | 6850 | 3.58 | 7244.0  | 80.5  | 6847 | 3.70 | 2331.3 | 25.8 | 4912.7  |
| 169 | A | 6835 | 3.93 | 7151.8  | 101.5 | 6832 | 3.86 | 1715.4 | 25.7 | 5436.4  |
| 170 | A | 6820 | 3.98 | 17288.2 | 110.6 | 6817 | 3.49 | 1583.1 | 37.4 | 15705.1 |
| 171 | A | 6805 | 3.81 | 27270.7 | 144.2 | 6802 | 3.45 | 2207.8 | 37.2 | 25062.8 |
| 172 | C | 6789 | 3.77 | 16173.1 | 109.4 | 6787 | 3.73 | 4303.5 | 43.8 | 11869.6 |
| 173 | A | 6774 | 3.77 | 11421.5 | 89.5  | 6772 | 3.96 | 2405.3 | 47.8 | 9016.2  |
| 174 | G | 6761 | 3.81 | 14787.8 | 92.1  | 6758 | 3.92 | 4056.0 | 61.2 | 10731.8 |
| 175 | A | 6746 | 3.78 | 16305.1 | 135.9 | 6744 | 3.77 | 3330.5 | 45.9 | 12974.6 |
| 176 | A | 6732 | 3.73 | 18426.7 | 128.6 | 6730 | 3.78 | 2006.9 | 34.7 | 16419.8 |
| 177 | G | 6718 | 2.58 | 898.4   | 84.2  | 6714 | 3.11 | 183.9  | 28.8 | 714.5   |
| 178 | A | 6703 | 3.01 | 5424.4  | 78.5  | 6701 | 3.11 | 2256.8 | 27.5 | 3167.5  |
| 179 | A | 6688 | 2.58 | 2882.8  | 71.4  | 6686 | 3.11 | 1011.8 | 36.2 | 1871.0  |
| 180 | U | 6674 | 2.58 | 2910.2  | 82.9  | 6670 | 3.35 | 1471.8 | 38.7 | 1438.4  |
| 181 | G | 6661 | 2.58 | 267.3   | 48.4  | 6657 | 3.11 | 213.7  | 38.6 | 53.6    |
| 182 | U | 6646 | 3.77 | 5451.9  | 69.1  | 6644 | 4.19 | 2843.3 | 43.3 | 2608.6  |
| 183 | G | 6633 | 3.67 | 6872.7  | 84.5  | 6631 | 4.15 | 3437.1 | 36.9 | 3435.7  |
| 184 | A | 6618 | 3.43 | 2600.0  | 58.2  | 6615 | 3.59 | 1356.4 | 29.3 | 1243.7  |
| 185 | G | 6605 | 3.77 | 10190.6 | 63.7  | 6603 | 3.91 | 3827.3 | 40.1 | 6363.3  |
| 186 | A | 6590 | 3.73 | 8086.7  | 98.8  | 6588 | 3.86 | 1773.4 | 33.1 | 6313.3  |
| 187 | A | 6576 | 3.68 | 10173.0 | 104.8 | 6573 | 3.67 | 1837.3 | 23.4 | 8335.7  |
| 188 | G | 6564 | 3.88 | 3705.0  | 72.2  | 6561 | 4.19 | 1847.9 | 28.3 | 1857.1  |
| 189 | G | 6552 | 3.06 | 1627.2  | 60.1  | 6547 | 4.83 | 545.6  | 32.2 | 1081.6  |
| 190 | C | 6537 | 2.95 | 379.8   | 44.3  | 6534 | 2.79 | 165.1  | 24.6 | 214.7   |
| 191 | U | 6524 | 3.45 | 4086.9  | 64.3  | 6520 | 3.90 | 2031.9 | 36.0 | 2055.0  |
| 192 | U | 6511 | 3.55 | 323.6   | 61.6  | 6506 | 2.79 | 81.1   | 23.5 | 242.5   |

|     |   |      |      |         |       |      |      |        |       |         |
|-----|---|------|------|---------|-------|------|------|--------|-------|---------|
| 193 | C | 6496 | 2.95 | 1747.2  | 70.1  | 6492 | 4.16 | 1040.9 | 23.1  | 706.3   |
| 194 | C | 6481 | 3.88 | 11259.0 | 123.5 | 6478 | 4.11 | 5149.5 | 39.0  | 6109.5  |
| 195 | A | 6465 | 3.67 | 8675.0  | 161.2 | 6463 | 4.14 | 3165.9 | 31.0  | 5509.1  |
| 196 | C | 6451 | 3.54 | 9171.9  | 134.8 | 6448 | 3.98 | 2954.1 | 33.0  | 6217.8  |
| 197 | U | 6436 | 3.75 | 10045.6 | 107.3 | 6434 | 3.79 | 3357.3 | 30.6  | 6688.3  |
| 198 | A | 6422 | 3.10 | 4642.9  | 94.8  | 6421 | 3.89 | 1073.2 | 37.5  | 3569.7  |
| 199 | A | 6407 | 3.50 | 7666.2  | 103.9 | 6405 | 4.03 | 3526.6 | 37.3  | 4139.6  |
| 200 | G | 6394 | 3.33 | 4318.9  | 105.2 | 6392 | 3.93 | 2983.9 | 41.2  | 1335.0  |
| 201 | G | 6383 | 3.12 | 5764.3  | 63.4  | 6381 | 3.79 | 3498.7 | 34.3  | 2265.6  |
| 202 | C | 6369 | 2.95 | 4.5     | 55.3  | 6367 | 4.27 | 83.0   | 38.6  | -78.5   |
| 203 | U | 6356 | 3.67 | 14012.2 | 90.0  | 6353 | 4.19 | 5452.6 | 42.9  | 8559.6  |
| 204 | A | 6343 | 3.70 | 12076.2 | 124.8 | 6340 | 2.99 | 1178.0 | 54.2  | 10898.3 |
| 205 | A | 6329 | 3.70 | 15315.1 | 112.9 | 6326 | 2.79 | 1142.5 | 25.3  | 14172.6 |
| 206 | C | 6314 | 3.20 | 6843.5  | 112.3 | 6312 | 2.94 | 1445.9 | 26.0  | 5397.6  |
| 207 | U | 6301 | 2.95 | 1049.1  | 71.5  | 6298 | 3.60 | 277.3  | 32.5  | 771.7   |
| 208 | C | 6287 | 3.19 | 5952.3  | 77.0  | 6284 | 3.60 | 3005.6 | 27.9  | 2946.7  |
| 209 | U | 6273 | 3.18 | 3355.6  | 58.6  | 6270 | 3.89 | 1455.2 | 41.0  | 1900.4  |
| 210 | C | 6259 | 3.50 | 11376.7 | 56.2  | 6256 | 3.94 | 3936.4 | 45.5  | 7440.2  |
| 211 | A | 6245 | 3.25 | 11439.2 | 108.9 | 6242 | 3.10 | 2695.0 | 47.3  | 8744.2  |
| 212 | A | 6231 | 3.30 | 11313.3 | 118.6 | 6228 | 3.79 | 2038.0 | 61.0  | 9275.3  |
| 213 | C | 6216 | 3.50 | 11670.4 | 132.8 | 6213 | 4.34 | 3899.4 | 57.6  | 7771.0  |
| 214 | A | 6202 | 3.62 | 14097.6 | 88.3  | 6197 | 3.88 | 2147.1 | 105.8 | 11950.5 |
| 215 | G | 6190 | 3.58 | 23606.0 | 91.0  | 6188 | 3.69 | 4416.4 | 62.4  | 19189.6 |
| 216 | A | 6176 | 3.06 | 5954.9  | 181.7 | 6173 | 2.89 | 817.9  | 35.4  | 5136.9  |
| 217 | C | 6162 | 3.30 | 13840.5 | 206.3 | 6159 | 4.09 | 5493.2 | 47.8  | 8347.3  |
| 218 | A | 6148 | 3.58 | 38850.8 | 145.4 | 6145 | 3.79 | 7743.8 | 89.2  | 31107.0 |
| 219 | A | 6134 | 3.06 | 5985.0  | 164.9 | 6130 | 3.82 | 979.9  | 87.0  | 5005.1  |
| 220 | C | 6119 | 3.41 | 22983.7 | 138.1 | 6116 | 3.94 | 8286.1 | 84.4  | 14697.6 |
| 221 | A | 6106 | 3.46 | 28075.6 | 217.4 | 6103 | 3.45 | 5540.5 | 40.1  | 22535.0 |
| 222 | A | 6093 | 3.06 | 2828.9  | 241.9 | 6089 | 3.74 | 239.4  | 59.9  | 2589.5  |
| 223 | C | 6078 | 3.06 | 13292.4 | 155.4 | 6075 | 3.49 | 4691.9 | 77.6  | 8600.5  |
| 224 | A | 6063 | 3.06 | 10704.7 | 174.6 | 6061 | 2.59 | 1857.6 | 42.8  | 8847.1  |
| 225 | C | 6048 | 3.06 | 2164.7  | 179.7 | 6045 | 2.46 | 994.8  | 62.5  | 1169.9  |
| 226 | C | 6033 | 3.55 | 12300.5 | 126.2 | 6030 | 3.94 | 5783.9 | 53.9  | 6516.6  |
| 227 | U | 6021 | 3.86 | 15865.9 | 196.4 | 6018 | 3.94 | 4933.2 | 52.1  | 10932.8 |
| 228 | G | 6009 | 4.00 | 2556.2  | 209.8 | 6006 | 4.09 | 330.3  | 58.8  | 2225.9  |
| 229 | C | 5997 | 4.01 | 7285.8  | 163.1 | 5994 | 3.00 | 1752.3 | 31.7  | 5533.5  |
| 230 | U | 5984 | 3.68 | 29547.3 | 365.8 | 5982 | 3.74 | 4210.8 | 38.0  | 25336.5 |
| 231 | U | 5972 | 3.42 | 15668.6 | 167.0 | 5968 | 3.58 | 1593.1 | 57.5  | 14075.5 |
| 232 | C | 5957 | 3.37 | 13562.6 | 175.4 | 5955 | 3.15 | 3394.3 | 44.1  | 10168.3 |
| 233 | A | 5943 | 3.24 | 13131.3 | 127.0 | 5940 | 2.63 | 1889.8 | 48.7  | 11241.5 |
| 234 | U | 5929 | 3.36 | 14613.7 | 100.7 | 5925 | 2.46 | 1199.3 | 50.4  | 13414.4 |
| 235 | C | 5914 | 3.41 | 13766.5 | 112.4 | 5911 | 3.19 | 3658.4 | 41.6  | 10108.1 |
| 236 | A | 5898 | 3.36 | 10949.4 | 100.2 | 5895 | 2.90 | 2420.1 | 44.4  | 8529.3  |
| 237 | G | 5885 | 3.22 | 9208.7  | 81.3  | 5883 | 3.09 | 2336.8 | 47.4  | 6871.9  |
| 238 | C | 5873 | 2.88 | 4717.3  | 92.6  | 5870 | 2.95 | 1644.3 | 42.8  | 3073.0  |
| 239 | U | 5860 | 2.54 | 1109.8  | 79.2  | 5856 | 2.29 | 242.5  | 15.8  | 867.4   |
| 240 | G | 5850 | 2.91 | 946.0   | 75.2  | 5848 | 2.09 | 334.1  | 19.4  | 612.0   |

|     |   |      |      |         |       |      |      |        |       |         |
|-----|---|------|------|---------|-------|------|------|--------|-------|---------|
| 241 | U | 5838 | 2.65 | 4676.4  | 84.7  | 5837 | 2.29 | 689.8  | 27.9  | 3986.5  |
| 242 | U | 5825 | 3.18 | 4779.4  | 135.5 | 5823 | 2.36 | 592.4  | 27.0  | 4187.0  |
| 243 | C | 5810 | 3.27 | 11905.6 | 133.1 | 5807 | 3.44 | 2002.7 | 25.8  | 9902.8  |
| 244 | C | 5796 | 3.55 | 17800.0 | 215.6 | 5793 | 3.70 | 5608.4 | 49.3  | 12191.6 |
| 245 | A | 5782 | 3.61 | 27462.6 | 137.0 | 5779 | 3.55 | 5828.7 | 77.6  | 21633.9 |
| 246 | G | 5771 | 3.62 | 23104.8 | 103.2 | 5769 | 3.79 | 6706.8 | 103.4 | 16398.0 |
| 247 | A | 5758 | 3.61 | 7510.9  | 113.5 | 5756 | 3.99 | 2535.1 | 58.8  | 4975.8  |
| 248 | G | 5748 | 3.46 | 9942.5  | 92.4  | 5745 | 3.19 | 1992.4 | 44.5  | 7950.1  |
| 249 | A | 5736 | 3.42 | 20116.8 | 107.0 | 5734 | 3.23 | 2851.7 | 42.4  | 17265.2 |
| 250 | A | 5722 | 2.42 | 1408.8  | 113.2 | 5720 | 2.09 | 199.2  | 35.7  | 1209.6  |
| 251 | C | 5708 | 2.42 | 3569.3  | 67.8  | 5706 | 3.07 | 1228.1 | 33.1  | 2341.2  |
| 252 | C | 5694 | 2.67 | 3973.4  | 105.5 | 5691 | 3.80 | 2923.6 | 39.0  | 1049.7  |
| 253 | C | 5679 | 3.12 | 8042.0  | 72.0  | 5676 | 3.84 | 4876.1 | 53.2  | 3165.9  |
| 254 | C | 5665 | 3.18 | 4729.8  | 100.0 | 5662 | 3.64 | 2734.8 | 44.3  | 1995.0  |
| 255 | C | 5651 | 3.04 | 9809.9  | 143.1 | 5649 | 3.61 | 5284.0 | 38.5  | 4525.9  |
| 256 | A | 5638 | 2.78 | 4589.3  | 73.0  | 5635 | 3.48 | 2879.0 | 52.3  | 1710.3  |
| 257 | U | 5625 | 2.42 | 507.7   | 75.8  | 5623 | 2.09 | 413.6  | 51.7  | 94.1    |
| 258 | C | 5611 | 2.91 | 7492.8  | 110.9 | 5609 | 3.44 | 4012.0 | 35.2  | 3480.8  |
| 259 | A | 5599 | 2.67 | 960.6   | 56.6  | 5594 | 3.25 | 906.2  | 30.0  | 54.5    |
| 260 | U | 5587 | 3.27 | 4983.9  | 76.8  | 5584 | 3.12 | 2664.0 | 30.4  | 2319.9  |
| 261 | G | 5575 | 2.67 | 1586.6  | 88.8  | 5573 | 2.77 | 963.0  | 37.0  | 623.6   |
| 262 | C | 5561 | 3.24 | 8867.7  | 95.6  | 5559 | 3.59 | 3137.8 | 35.0  | 5729.9  |
| 263 | C | 5549 | 3.29 | 13765.6 | 95.8  | 5546 | 3.50 | 3309.6 | 30.6  | 10456.0 |
| 264 | U | 5536 | 3.42 | 451.8   | 70.9  | 5533 | 3.45 | 230.0  | 30.7  | 221.7   |
| 265 | C | 5523 | 2.87 | 4786.9  | 54.3  | 5520 | 3.24 | 2442.8 | 39.4  | 2344.1  |
| 266 | U | 5511 | 2.67 | 1468.2  | 59.4  | 5508 | 2.77 | 631.4  | 22.7  | 836.8   |
| 267 | C | 5497 | 2.67 | 2457.1  | 68.5  | 5494 | 3.20 | 1492.8 | 32.2  | 964.3   |
| 268 | C | 5483 | 3.29 | 9181.5  | 113.8 | 5480 | 3.59 | 4273.8 | 41.7  | 4907.8  |
| 269 | U | 5469 | 3.39 | 3501.4  | 80.4  | 5466 | 3.69 | 1925.1 | 28.3  | 1576.3  |
| 270 | C | 5457 | 3.48 | 5549.9  | 82.0  | 5454 | 3.43 | 2653.2 | 39.2  | 2896.7  |
| 271 | A | 5444 | 3.48 | 23180.1 | 73.1  | 5442 | 3.52 | 3914.4 | 46.8  | 19265.7 |
| 272 | A | 5431 | 3.42 | 28473.1 | 119.2 | 5428 | 3.22 | 2099.0 | 55.5  | 26374.0 |
| 273 | C | 5417 | 2.79 | 4502.3  | 83.6  | 5414 | 2.84 | 1257.9 | 44.2  | 3244.4  |
| 274 | C | 5403 | 3.29 | 6794.2  | 85.2  | 5400 | 3.24 | 3394.6 | 48.8  | 3399.6  |
| 275 | U | 5391 | 3.14 | 9451.3  | 112.2 | 5389 | 3.37 | 4847.6 | 66.0  | 4603.7  |
| 276 | G | 5380 | 2.67 | 2566.5  | 67.0  | 5377 | 3.47 | 1516.7 | 49.4  | 1049.8  |
| 277 | C | 5366 | 2.67 | 2660.3  | 54.9  | 5364 | 2.77 | 1351.1 | 25.5  | 1309.2  |
| 278 | U | 5353 | 2.67 | 1082.3  | 75.4  | 5351 | 2.77 | 403.6  | 32.0  | 678.6   |
| 279 | U | 5341 | 3.47 | 10475.2 | 47.9  | 5338 | 3.77 | 2794.8 | 37.4  | 7680.4  |
| 280 | C | 5327 | 3.36 | 16534.5 | 85.8  | 5324 | 3.39 | 6369.7 | 62.8  | 10164.8 |
| 281 | A | 5315 | 3.27 | 4505.9  | 85.0  | 5311 | 3.32 | 1928.5 | 32.1  | 2577.4  |
| 282 | G | 5304 | 2.82 | 1796.9  | 77.8  | 5300 | 2.95 | 974.1  | 40.4  | 822.8   |
| 283 | U | 5294 | 3.17 | 6278.1  | 97.2  | 5291 | 2.94 | 2841.5 | 38.9  | 3436.7  |
| 284 | A | 5281 | 2.82 | 1925.3  | 96.6  | 5278 | 2.72 | 751.9  | 27.5  | 1173.4  |
| 285 | C | 5267 | 3.01 | 2313.7  | 85.9  | 5264 | 3.87 | 1327.9 | 45.8  | 985.8   |
| 286 | C | 5254 | 3.37 | 21540.5 | 104.4 | 5251 | 3.47 | 8082.5 | 121.0 | 13458.0 |
| 287 | A | 5242 | 2.88 | 4915.4  | 77.4  | 5239 | 2.72 | 1638.2 | 45.9  | 3277.2  |
| 288 | C | 5227 | 2.82 | 1291.4  | 76.0  | 5225 | 2.72 | 421.0  | 26.1  | 870.5   |

|     |   |      |      |         |       |      |      |        |       |         |
|-----|---|------|------|---------|-------|------|------|--------|-------|---------|
| 289 | C | 5214 | 2.82 | 7064.7  | 83.5  | 5211 | 2.72 | 2425.9 | 36.0  | 4638.7  |
| 290 | U | 5202 | 2.82 | 1527.0  | 79.0  | 5198 | 2.72 | 687.3  | 42.2  | 839.7   |
| 291 | C | 5189 | 2.90 | 6397.8  | 131.4 | 5186 | 3.03 | 1706.4 | 50.9  | 4691.4  |
| 292 | C | 5175 | 3.12 | 12968.8 | 176.4 | 5173 | 3.20 | 5422.1 | 47.8  | 7546.7  |
| 293 | A | 5162 | 2.82 | 5404.9  | 202.9 | 5159 | 3.47 | 2369.9 | 53.6  | 3035.1  |
| 294 | C | 5147 | 3.67 | 16583.4 | 144.0 | 5144 | 3.53 | 5236.4 | 59.7  | 11347.0 |
| 295 | A | 5134 | 3.52 | 42229.7 | 348.9 | 5132 | 3.57 | 8348.4 | 88.3  | 33881.3 |
| 296 | G | 5122 | 3.37 | 16956.3 | 281.7 | 5119 | 3.72 | 2115.7 | 53.3  | 14840.6 |
| 297 | A | 5107 | 3.57 | 32926.5 | 202.9 | 5104 | 3.53 | 4069.3 | 50.3  | 28857.2 |
| 298 | A | 5093 | 3.39 | 26319.5 | 161.0 | 5090 | 3.42 | 3145.9 | 33.7  | 23173.7 |
| 299 | U | 5082 | 3.37 | 15639.4 | 102.4 | 5078 | 3.27 | 1384.7 | 39.2  | 14254.7 |
| 300 | G | 5072 | 3.37 | 3166.1  | 77.4  | 5068 | 2.72 | 1315.8 | 34.1  | 1850.3  |
| 301 | G | 5061 | 3.37 | 2566.5  | 55.9  | 5058 | 2.87 | 1696.3 | 46.7  | 870.2   |
| 302 | G | 5051 | 3.25 | 7947.9  | 73.1  | 5048 | 3.34 | 4350.7 | 29.6  | 3597.1  |
| 303 | C | 5038 | 3.24 | 10176.3 | 83.5  | 5035 | 3.47 | 3592.4 | 37.3  | 6583.9  |
| 304 | C | 5025 | 3.42 | 4821.4  | 66.4  | 5021 | 3.23 | 2078.8 | 54.4  | 2742.6  |
| 305 | G | 5015 | 3.07 | 2685.4  | 48.5  | 5013 | 2.61 | 1076.4 | 38.9  | 1609.0  |
| 306 | U | 5003 | 2.56 | 1865.0  | 55.6  | 5000 | 2.40 | 658.5  | 34.9  | 1206.5  |
| 307 | A | 4989 | 2.31 | 2772.0  | 60.2  | 4986 | 2.42 | 1072.0 | 21.0  | 1700.0  |
| 308 | C | 4974 | 2.07 | 1340.5  | 48.4  | 4970 | 2.12 | 191.6  | 30.1  | 1148.9  |
| 309 | C | 4962 | 2.83 | 3977.1  | 166.2 | 4959 | 2.79 | 2142.3 | 102.4 | 1834.8  |
| 310 | C | 4951 | 3.27 | 13652.5 | 119.1 | 4948 | 3.52 | 6114.7 | 84.8  | 7537.8  |
| 311 | A | 4937 | 3.19 | 7925.6  | 99.7  | 4933 | 3.24 | 2364.4 | 39.2  | 5561.1  |
| 312 | C | 4923 | 3.26 | 15830.6 | 125.3 | 4920 | 3.32 | 5816.1 | 49.9  | 10014.5 |
| 313 | A | 4911 | 2.90 | 2916.2  | 106.0 | 4908 | 2.71 | 1509.3 | 41.0  | 1406.9  |
| 314 | G | 4900 | 2.07 | 728.0   | 43.3  | 4898 | 2.12 | 342.4  | 26.9  | 385.6   |
| 315 | C | 4889 | 2.50 | 3814.3  | 74.5  | 4885 | 2.74 | 2019.4 | 33.6  | 1795.0  |
| 316 | A | 4876 | 2.93 | 4543.3  | 137.3 | 4872 | 2.97 | 2649.4 | 51.7  | 1894.0  |
| 317 | G | 4865 | 3.47 | 11939.6 | 75.4  | 4861 | 3.22 | 3236.9 | 37.5  | 8702.6  |
| 318 | U | 4853 | 3.30 | 33194.7 | 191.4 | 4850 | 3.12 | 4890.0 | 49.0  | 28304.7 |
| 319 | G | 4841 | 2.07 | 1749.3  | 198.1 | 4838 | 2.30 | 736.5  | 29.9  | 1012.8  |
| 320 | C | 4829 | 2.70 | 5487.0  | 119.7 | 4826 | 3.14 | 3637.6 | 63.2  | 1849.3  |
| 321 | A | 4816 | 2.55 | 4021.6  | 113.0 | 4813 | 2.87 | 2121.0 | 74.5  | 1900.6  |
| 322 | U | 4805 | 3.19 | 3244.4  | 159.0 | 4802 | 3.54 | 2250.9 | 81.5  | 993.5   |
| 323 | G | 4794 | 3.20 | 9648.9  | 169.8 | 4791 | 3.59 | 4736.9 | 50.2  | 4912.0  |
| 324 | A | 4783 | 2.07 | 1315.1  | 69.4  | 4779 | 2.40 | 1000.2 | 35.8  | 314.9   |
| 325 | U | 4773 | 2.07 | 0.0     | 47.4  | 4767 | 2.12 | 279.4  | 21.3  | -279.4  |
| 326 | G | 4762 | 3.00 | 2685.3  | 39.8  | 4759 | 2.70 | 1109.4 | 32.1  | 1575.9  |
| 327 | A | 4750 | 2.73 | 8895.9  | 139.9 | 4747 | 3.01 | 2016.4 | 36.4  | 6879.5  |
| 328 | C | 4736 | 2.66 | 5286.3  | 188.9 | 4733 | 3.52 | 3643.0 | 70.7  | 1643.4  |
| 329 | C | 4723 | 3.16 | 16750.2 | 144.3 | 4719 | 3.44 | 7723.9 | 90.9  | 9026.3  |
| 330 | C | 4710 | 3.16 | 22707.2 | 128.6 | 4707 | 3.28 | 8731.1 | 63.9  | 13976.1 |
| 331 | A | 4699 | 3.16 | 12947.2 | 127.8 | 4695 | 3.24 | 2505.3 | 55.4  | 10441.9 |
| 332 | A | 4687 | 3.16 | 18339.6 | 116.5 | 4683 | 2.86 | 2472.7 | 47.2  | 15866.8 |
| 333 | A | 4675 | 3.10 | 25614.5 | 225.6 | 4672 | 2.47 | 2355.9 | 40.1  | 23258.6 |
| 334 | A | 4663 | 2.56 | 9728.4  | 178.2 | 4659 | 2.24 | 675.3  | 34.5  | 9053.2  |
| 335 | C | 4649 | 2.30 | 3659.8  | 153.8 | 4646 | 2.89 | 1301.4 | 65.5  | 2358.4  |
| 336 | C | 4637 | 3.11 | 17499.7 | 157.9 | 4634 | 3.34 | 6993.8 | 73.3  | 10505.8 |

|     |   |      |      |         |       |      |      |         |       |         |
|-----|---|------|------|---------|-------|------|------|---------|-------|---------|
| 337 | A | 4625 | 3.05 | 22609.2 | 222.6 | 4622 | 3.24 | 4305.1  | 59.2  | 18304.0 |
| 338 | A | 4613 | 2.92 | 13430.3 | 195.1 | 4609 | 2.54 | 1835.6  | 50.5  | 11594.7 |
| 339 | G | 4602 | 2.60 | 5270.4  | 161.5 | 4596 | 2.24 | 455.3   | 40.6  | 4815.1  |
| 340 | C | 4590 | 2.52 | 5457.2  | 104.6 | 4586 | 3.05 | 3211.4  | 36.1  | 2245.7  |
| 341 | C | 4577 | 2.45 | 5064.0  | 113.9 | 4574 | 3.05 | 2734.3  | 48.4  | 2329.7  |
| 342 | A | 4566 | 2.30 | 4773.2  | 93.7  | 4562 | 2.64 | 1777.9  | 35.6  | 2995.3  |
| 343 | A | 4553 | 2.66 | 6293.1  | 166.3 | 4549 | 2.62 | 823.3   | 30.3  | 5469.9  |
| 344 | U | 4541 | 2.78 | 11781.1 | 197.6 | 4538 | 2.64 | 1325.9  | 30.1  | 10455.1 |
| 345 | C | 4530 | 2.30 | 1768.5  | 270.7 | 4525 | 3.44 | 671.0   | 51.4  | 1097.5  |
| 346 | C | 4516 | 3.05 | 21574.9 | 289.6 | 4513 | 3.05 | 5428.7  | 91.6  | 16146.1 |
| 347 | A | 4504 | 2.71 | 8459.7  | 174.0 | 4501 | 2.35 | 1666.4  | 39.3  | 6793.3  |
| 348 | U | 4492 | 2.42 | 5788.1  | 204.0 | 4489 | 2.24 | 244.8   | 48.5  | 5543.3  |
| 349 | C | 4478 | 3.19 | 11932.6 | 183.1 | 4474 | 2.96 | 3120.9  | 55.3  | 8811.6  |
| 350 | U | 4466 | 3.10 | 18887.1 | 251.4 | 4463 | 2.96 | 4417.6  | 50.9  | 14469.6 |
| 351 | G | 4456 | 2.44 | 1274.7  | 52.1  | 4453 | 2.50 | 484.0   | 30.6  | 790.6   |
| 352 | G | 4445 | 2.44 | 510.1   | 41.1  | 4443 | 2.15 | 294.9   | 24.5  | 215.2   |
| 353 | U | 4435 | 2.82 | 3921.1  | 60.8  | 4430 | 2.15 | 1249.7  | 38.6  | 2671.4  |
| 354 | U | 4423 | 3.04 | 3546.8  | 47.7  | 4420 | 2.62 | 1105.4  | 81.0  | 2441.4  |
| 355 | G | 4413 | 2.82 | 3163.0  | 89.3  | 4410 | 3.50 | 3466.6  | 42.9  | -303.6  |
| 356 | G | 4404 | 3.20 | 9912.5  | 112.4 | 4400 | 3.25 | 6448.0  | 79.1  | 3464.4  |
| 357 | U | 4393 | 2.89 | 7779.5  | 145.5 | 4390 | 3.15 | 2220.6  | 70.0  | 5558.9  |
| 358 | C | 4380 | 3.44 | 16696.7 | 219.7 | 4376 | 3.30 | 5533.3  | 64.3  | 11163.4 |
| 359 | A | 4368 | 3.25 | 31787.6 | 416.7 | 4365 | 3.30 | 5344.3  | 66.7  | 26443.2 |
| 360 | U | 4358 | 2.92 | 16952.1 | 225.4 | 4354 | 3.34 | 4121.0  | 47.9  | 12831.1 |
| 361 | U | 4346 | 3.06 | 1173.2  | 83.0  | 4343 | 2.15 | 198.8   | 34.1  | 974.4   |
| 362 | U | 4335 | 2.92 | 6206.6  | 88.5  | 4331 | 2.15 | 451.1   | 14.7  | 5755.6  |
| 363 | U | 4324 | 2.61 | 4012.0  | 73.5  | 4320 | 2.51 | 948.8   | 23.0  | 3063.3  |
| 364 | A | 4312 | 2.44 | 2966.1  | 59.8  | 4307 | 2.64 | 1671.8  | 43.3  | 1294.3  |
| 365 | C | 4301 | 4.64 | 834.9   | 170.0 | 4297 | 2.85 | 1102.5  | 79.9  | -267.6  |
| 366 | G | 4291 | 3.63 | 5109.7  | 112.7 | 4288 | 4.50 | 3815.4  | 56.3  | 1294.4  |
| 367 | G | 4282 | 2.44 | 3145.7  | 114.6 | 4277 | 2.80 | 1547.5  | 85.5  | 1598.2  |
| 368 | A | 4272 | 2.44 | 258.0   | 103.0 | 4267 | 2.15 | 188.1   | 43.1  | 69.9    |
| 369 | C | 4259 | 2.68 | 4863.0  | 117.5 | 4256 | 2.77 | 2217.2  | 47.9  | 2645.8  |
| 370 | A | 4248 | 2.44 | 6194.4  | 112.5 | 4243 | 2.15 | 161.8   | 26.0  | 6032.6  |
| 371 | C | 4234 | 2.78 | 6095.7  | 199.9 | 4229 | 2.37 | 1561.4  | 29.7  | 4534.3  |
| 372 | C | 4222 | 2.44 | 2467.5  | 147.4 | 4217 | 2.58 | 805.4   | 45.8  | 1662.1  |
| 373 | C | 4209 | 3.08 | 11102.5 | 125.9 | 4205 | 3.09 | 4742.5  | 43.8  | 6360.0  |
| 374 | A | 4198 | 3.18 | 18742.1 | 125.9 | 4194 | 3.17 | 3329.4  | 35.3  | 15412.7 |
| 375 | U | 4187 | 2.95 | 9860.6  | 145.8 | 4182 | 3.42 | 2208.5  | 54.1  | 7652.1  |
| 376 | C | 4174 | 3.18 | 14382.7 | 146.8 | 4169 | 3.22 | 6866.6  | 101.2 | 7516.1  |
| 377 | U | 4163 | 3.33 | 26723.9 | 137.7 | 4159 | 3.23 | 11090.0 | 111.8 | 15633.9 |
| 378 | A | 4151 | 3.18 | 25005.0 | 272.4 | 4147 | 3.10 | 6873.8  | 156.8 | 18131.2 |
| 379 | U | 4141 | 3.33 | 28728.5 | 360.4 | 4138 | 3.39 | 11490.8 | 198.3 | 17237.7 |
| 380 | G | 4131 | 3.37 | 17536.5 | 423.3 | 4128 | 3.56 | 3385.3  | 116.0 | 14151.3 |
| 381 | A | 4121 | 2.30 | 5288.3  | 149.5 | 4117 | 2.42 | 1137.5  | 21.3  | 4150.8  |
| 382 | U | 4108 | 2.93 | 6338.0  | 98.7  | 4105 | 2.42 | 160.2   | 15.3  | 6177.8  |
| 383 | U | 4098 | 2.23 | 2260.6  | 57.8  | 4094 | 2.42 | 526.1   | 25.4  | 1734.5  |
| 384 | C | 4085 | 2.38 | 2772.9  | 65.0  | 4082 | 3.02 | 2308.9  | 52.8  | 464.1   |

|     |   |      |      |         |       |      |      |        |      |         |
|-----|---|------|------|---------|-------|------|------|--------|------|---------|
| 385 | C | 4076 | 2.23 | 1433.5  | 130.2 | 4073 | 4.04 | 1544.0 | 51.4 | -110.5  |
| 386 | G | 4069 | 4.08 | 8536.9  | 93.0  | 4066 | 4.37 | 6161.0 | 66.2 | 2375.9  |
| 387 | U | 4056 | 3.63 | 3503.2  | 165.9 | 4052 | 4.57 | 1342.9 | 93.7 | 2160.4  |
| 388 | A | 4045 | 3.09 | 11216.8 | 123.8 | 4041 | 2.82 | 2441.1 | 67.1 | 8775.7  |
| 389 | U | 4036 | 3.09 | 15421.9 | 138.6 | 4033 | 2.77 | 2339.3 | 45.1 | 13082.6 |
| 390 | A | 4025 | 2.23 | 1583.3  | 127.5 | 4022 | 2.42 | 0.0    | 32.4 | 1583.3  |
| 391 | C | 4013 | 3.58 | 5242.5  | 193.8 | 4010 | 3.02 | 3451.1 | 45.9 | 1791.4  |
| 392 | A | 4002 | 3.04 | 12449.6 | 427.7 | 4000 | 3.02 | 2085.7 | 44.5 | 10364.0 |
| 393 | C | 3989 | 2.23 | 1324.7  | 98.2  | 3985 | 2.94 | 1459.8 | 34.5 | -135.1  |
| 394 | C | 3977 | 2.66 | 4158.8  | 82.6  | 3973 | 3.04 | 2306.5 | 33.6 | 1852.3  |
| 395 | U | 3967 | 3.51 | 4444.6  | 170.0 | 3963 | 2.76 | 1294.6 | 41.0 | 3150.0  |
| 396 | U | 3957 | 3.15 | 13962.6 | 312.6 | 3954 | 3.22 | 3362.2 | 33.8 | 10600.4 |
| 397 | A | 3946 | 2.94 | 15477.7 | 228.9 | 3942 | 3.21 | 3511.0 | 46.1 | 11966.8 |
| 398 | U | 3936 | 3.01 | 11693.5 | 199.8 | 3931 | 3.18 | 2993.4 | 46.8 | 8700.1  |
| 399 | C | 3923 | 3.31 | 11952.7 | 74.3  | 3919 | 3.26 | 3991.8 | 40.7 | 7960.9  |
| 400 | A | 3912 | 3.34 | 12372.6 | 136.1 | 3908 | 2.92 | 2034.2 | 40.3 | 10338.4 |
| 401 | A | 3900 | 3.19 | 19093.5 | 262.5 | 3897 | 3.28 | 4763.6 | 53.6 | 14330.0 |
| 402 | A | 3890 | 2.80 | 6178.7  | 134.0 | 3886 | 3.26 | 1048.4 | 56.7 | 5130.3  |
| 403 | U | 3879 | 3.57 | 7110.6  | 152.7 | 3877 | 3.19 | 1147.0 | 41.9 | 5963.7  |
| 404 | G | 3869 | 4.21 | 2999.4  | 95.9  | 3868 | 3.81 | 1750.7 | 31.0 | 1248.7  |
| 405 | U | 3858 | 3.31 | 623.7   | 89.2  | 3856 | 2.66 | 593.1  | 34.5 | 30.6    |
| 406 | C | 3848 | 3.72 | 6001.9  | 72.1  | 3844 | 4.28 | 5482.2 | 67.4 | 519.7   |
| 407 | G | 3838 | 2.73 | 1578.2  | 93.5  | 3833 | 3.14 | 1319.1 | 72.5 | 259.1   |
| 408 | C | 3827 | 1.96 | 499.0   | 31.3  | 3821 | 2.66 | 445.8  | 34.5 | 53.2    |
| 409 | C | 3815 | 2.80 | 1323.3  | 53.9  | 3809 | 2.79 | 1344.7 | 37.2 | -21.4   |
| 410 | U | 3804 | 3.36 | 4053.0  | 47.9  | 3799 | 3.21 | 2888.9 | 38.6 | 1164.1  |
| 411 | A | 3793 | 3.43 | 5856.7  | 64.8  | 3788 | 3.61 | 3135.9 | 43.6 | 2720.8  |
| 412 | U | 3780 | 4.30 | 2640.3  | 115.5 | 3772 | 3.89 | 1688.4 | 37.8 | 951.9   |
| 413 | G | 3767 | 3.91 | 5671.4  | 139.6 | 3762 | 3.18 | 2025.9 | 39.2 | 3645.5  |
| 414 | U | 3756 | 3.17 | 5575.3  | 78.2  | 3756 | 2.66 | 678.9  | 29.3 | 4896.4  |
| 415 | A | 3746 | 3.16 | 1814.9  | 85.0  | 3750 | 3.02 | 1759.7 | 36.5 | 55.2    |
| 416 | C | 3735 | 3.53 | 5880.7  | 63.7  | 3738 | 5.05 | 1575.7 | 82.7 | 4305.0  |
| 417 | U | 3725 | 3.38 | 12469.1 | 95.4  | 3721 | 4.46 | 3597.5 | 88.0 | 8871.5  |
| 418 | U | 3715 | 3.11 | 3292.9  | 88.8  | 3711 | 3.03 | 2163.7 | 37.9 | 1129.2  |
| 419 | U | 3705 | 3.06 | 1103.2  | 48.4  | 3700 | 3.66 | 1262.8 | 56.2 | -159.6  |
| 420 | C | 3695 | 3.42 | 5001.8  | 56.0  | 3689 | 4.11 | 5271.3 | 94.1 | -269.5  |

# DMS\_example\_1\_peaks.txt

| seqnum | seq | RX.pos | RX.sigma | RX.area | RX.rms | BG.pos | BG.sigma | BG.area | BG.rms | (RX.area-BG.area) |
|--------|-----|--------|----------|---------|--------|--------|----------|---------|--------|-------------------|
| 7      | A   | 9611   | 5.21     | 31148.4 | 254.3  | 9607   | 4.32     | 1782.2  | 44.7   | 29366.2           |
| 8      | A   | 9595   | 5.02     | 36816.6 | 342.6  | 9589   | 5.81     | 2.4     | 65.8   | 36814.2           |
| 9      | C   | 9578   | 5.25     | 41562.2 | 344.4  | 9571   | 5.27     | 3445.1  | 72.5   | 38117.1           |
| 10     | U   | 9561   | 5.26     | 8503.4  | 320.3  | 9557   | 4.77     | 3268.8  | 33.6   | 5234.6            |
| 11     | U   | 9543   | 3.40     | 421.1   | 177.1  | 9539   | 3.52     | 116.4   | 41.7   | 304.7             |
| 12     | C   | 9526   | 5.34     | 27302.7 | 264.2  | 9521   | 5.00     | 4592.8  | 61.2   | 22710.0           |
| 13     | U   | 9508   | 5.30     | 14934.0 | 166.5  | 9505   | 5.30     | 5620.0  | 54.0   | 9314.0            |
| 14     | A   | 9491   | 5.02     | 31481.2 | 347.5  | 9487   | 5.70     | 2968.6  | 72.8   | 28512.5           |
| 15     | G   | 9476   | 3.40     | 1985.4  | 82.9   | 9467   | 5.42     | 621.5   | 59.1   | 1363.9            |
| 16     | U   | 9460   | 4.78     | 3640.6  | 75.4   | 9455   | 4.60     | 1793.0  | 35.6   | 1847.6            |
| 17     | A   | 9443   | 4.48     | 7155.8  | 90.2   | 9438   | 4.29     | 1891.2  | 30.6   | 5264.7            |
| 18     | U   | 9426   | 3.40     | 707.3   | 78.1   | 9423   | 3.50     | 160.9   | 21.3   | 546.4             |
| 19     | A   | 9409   | 3.95     | 5609.6  | 90.1   | 9405   | 4.35     | 1985.5  | 36.8   | 3624.1            |
| 20     | U   | 9393   | 3.40     | 642.3   | 46.3   | 9389   | 3.50     | 574.0   | 41.6   | 68.2              |
| 21     | U   | 9375   | 3.67     | 3033.4  | 107.8  | 9372   | 3.50     | 631.6   | 40.8   | 2401.9            |
| 22     | C   | 9358   | 4.45     | 16979.6 | 131.0  | 9353   | 4.70     | 3220.5  | 40.2   | 13759.1           |
| 23     | U   | 9342   | 4.65     | 8152.2  | 109.2  | 9338   | 4.54     | 4704.0  | 40.2   | 3448.2            |
| 24     | G   | 9327   | 4.55     | 4530.3  | 109.3  | 9325   | 5.20     | 2609.0  | 93.4   | 1921.3            |
| 25     | U   | 9311   | 3.40     | 2110.4  | 65.9   | 9307   | 6.40     | 1770.4  | 65.3   | 340.1             |
| 26     | A   | 9296   | 3.40     | 539.5   | 63.8   | 9291   | 3.50     | 56.8    | 34.2   | 482.7             |
| 27     | U   | 9279   | 4.13     | 2172.5  | 76.3   | 9275   | 4.35     | 1587.5  | 40.1   | 585.0             |
| 28     | A   | 9262   | 3.78     | 5596.5  | 106.5  | 9258   | 3.50     | 1013.4  | 35.0   | 4583.1            |
| 29     | C   | 9242   | 4.18     | 1786.1  | 136.7  | 9237   | 4.70     | 1038.9  | 45.8   | 747.1             |
| 30     | C   | 9226   | 4.55     | 13741.9 | 95.9   | 9222   | 4.50     | 3422.6  | 48.4   | 10319.3           |
| 31     | U   | 9210   | 4.28     | 6279.1  | 94.3   | 9207   | 4.35     | 2616.8  | 41.1   | 3662.3            |
| 32     | A   | 9194   | 4.83     | 30477.0 | 305.1  | 9190   | 4.05     | 2932.7  | 51.2   | 27544.3           |
| 33     | A   | 9176   | 4.87     | 19918.6 | 309.3  | 9172   | 3.50     | 1047.1  | 50.8   | 18871.5           |
| 34     | U   | 9160   | 4.28     | 9634.1  | 123.8  | 9155   | 3.50     | 2182.3  | 56.0   | 7451.8            |
| 35     | A   | 9143   | 4.60     | 34636.9 | 149.9  | 9139   | 3.50     | 3487.4  | 44.3   | 31149.5           |
| 36     | U   | 9126   | 3.40     | 2450.0  | 190.2  | 9122   | 3.50     | 503.6   | 35.0   | 1946.4            |
| 37     | U   | 9110   | 3.95     | 7661.3  | 201.5  | 9106   | 4.04     | 3251.7  | 47.8   | 4409.6            |
| 38     | A   | 9093   | 4.46     | 30216.8 | 187.6  | 9088   | 3.96     | 2508.3  | 56.6   | 27708.5           |
| 39     | U   | 9077   | 3.40     | 62.6    | 117.7  | 9074   | 3.50     | 327.6   | 40.4   | -265.1            |
| 40     | A   | 9061   | 4.01     | 8828.7  | 108.2  | 9058   | 4.32     | 3169.9  | 28.3   | 5658.8            |
| 41     | G   | 9045   | 3.40     | 1087.7  | 54.4   | 9044   | 4.36     | 997.5   | 23.3   | 90.2              |
| 42     | C   | 9027   | 3.40     | 1330.6  | 57.8   | 9025   | 4.61     | 659.9   | 25.1   | 670.6             |
| 43     | C   | 9011   | 3.59     | 3034.3  | 60.4   | 9008   | 4.58     | 1918.2  | 31.0   | 1116.2            |
| 44     | U   | 8994   | 3.46     | 1995.2  | 66.6   | 8992   | 5.16     | 1638.6  | 37.6   | 356.6             |
| 45     | U   | 8979   | 3.46     | 2118.8  | 79.0   | 8975   | 4.84     | 1522.9  | 39.0   | 595.9             |
| 46     | U   | 8963   | 4.76     | 7587.0  | 190.7  | 8961   | 4.66     | 3629.4  | 37.9   | 3957.7            |
| 47     | A   | 8946   | 4.51     | 31240.4 | 235.0  | 8943   | 4.14     | 2832.7  | 45.7   | 28407.8           |
| 48     | U   | 8928   | 3.46     | 698.6   | 79.7   | 8925   | 3.41     | 283.1   | 50.1   | 415.5             |
| 49     | C   | 8913   | 4.84     | 16690.4 | 258.1  | 8909   | 4.74     | 4200.1  | 49.8   | 12490.4           |

|    |   |      |      |         |       |      |      |        |      |         |
|----|---|------|------|---------|-------|------|------|--------|------|---------|
| 50 | A | 8895 | 4.71 | 37354.2 | 417.7 | 8892 | 4.76 | 4339.0 | 46.9 | 33015.1 |
| 51 | A | 8879 | 4.51 | 30352.9 | 222.0 | 8875 | 4.25 | 3267.1 | 47.2 | 27085.8 |
| 52 | C | 8860 | 4.76 | 8537.6  | 258.0 | 8857 | 3.70 | 1434.1 | 30.7 | 7103.5  |
| 53 | A | 8843 | 4.71 | 29619.6 | 238.3 | 8840 | 3.44 | 1476.2 | 31.8 | 28143.4 |
| 54 | A | 8826 | 4.71 | 41094.1 | 246.2 | 8823 | 4.41 | 2029.0 | 46.3 | 39065.1 |
| 55 | U | 8810 | 4.81 | 8140.6  | 210.2 | 8807 | 4.46 | 3600.2 | 36.9 | 4540.4  |
| 56 | G | 8797 | 3.89 | 4128.6  | 47.7  | 8795 | 4.26 | 2217.5 | 37.1 | 1911.1  |
| 57 | G | 8782 | 3.46 | 0.0     | 49.1  | 8779 | 4.88 | 13.5   | 28.0 | -13.5   |
| 58 | A | 8766 | 3.76 | 3511.3  | 70.9  | 8763 | 3.65 | 938.0  | 21.2 | 2573.3  |
| 59 | A | 8750 | 3.46 | 2528.4  | 52.0  | 8747 | 3.41 | 542.0  | 20.7 | 1986.5  |
| 60 | U | 8734 | 3.46 | 0.0     | 35.9  | 8736 | 5.21 | 139.4  | 22.8 | -139.4  |
| 61 | C | 8717 | 3.88 | 6965.2  | 63.5  | 8712 | 4.45 | 1486.3 | 30.0 | 5478.9  |
| 62 | C | 8698 | 4.80 | 55.6    | 142.1 | 8695 | 4.97 | 603.3  | 46.8 | -547.8  |
| 63 | C | 8681 | 4.59 | 18612.4 | 187.2 | 8678 | 4.80 | 3913.8 | 49.3 | 14698.7 |
| 64 | A | 8665 | 4.69 | 37583.3 | 263.2 | 8662 | 4.59 | 3940.7 | 46.3 | 33642.7 |
| 65 | A | 8648 | 4.69 | 31305.7 | 265.0 | 8645 | 4.64 | 2722.1 | 50.3 | 28583.6 |
| 66 | C | 8631 | 4.43 | 36580.9 | 206.4 | 8628 | 4.87 | 4805.8 | 61.3 | 31775.1 |
| 67 | A | 8615 | 4.75 | 39415.5 | 311.1 | 8611 | 5.05 | 3462.2 | 56.9 | 35953.3 |
| 68 | A | 8598 | 4.82 | 31909.1 | 258.3 | 8595 | 4.60 | 5041.1 | 52.8 | 26868.0 |
| 69 | U | 8581 | 4.70 | 2355.7  | 135.2 | 8580 | 4.55 | 867.8  | 43.4 | 1487.9  |
| 70 | U | 8567 | 4.48 | 9378.1  | 108.1 | 8565 | 4.75 | 3990.7 | 32.8 | 5387.4  |
| 71 | A | 8551 | 4.48 | 37097.7 | 154.4 | 8548 | 4.26 | 2883.7 | 50.7 | 34214.0 |
| 72 | U | 8535 | 4.50 | 4009.0  | 126.7 | 8534 | 3.16 | 1042.4 | 28.5 | 2966.6  |
| 73 | C | 8518 | 4.06 | 6139.3  | 68.9  | 8516 | 3.85 | 1939.8 | 26.7 | 4199.5  |
| 74 | U | 8502 | 3.24 | 723.4   | 68.5  | 8501 | 2.36 | 135.6  | 25.5 | 587.8   |
| 75 | C | 8485 | 3.93 | 4817.6  | 82.2  | 8483 | 4.38 | 2266.1 | 30.5 | 2551.5  |
| 76 | A | 8469 | 4.50 | 17628.5 | 122.8 | 8467 | 4.65 | 2783.5 | 27.5 | 14845.0 |
| 77 | A | 8453 | 4.65 | 11399.9 | 92.2  | 8450 | 4.55 | 1645.2 | 36.4 | 9754.7  |
| 78 | C | 8435 | 4.44 | 4283.4  | 73.2  | 8433 | 4.49 | 1942.1 | 39.6 | 2341.2  |
| 79 | A | 8419 | 4.34 | 7951.3  | 68.3  | 8417 | 4.35 | 3143.3 | 29.9 | 4808.0  |
| 80 | U | 8403 | 4.39 | 1697.1  | 50.1  | 8402 | 3.81 | 967.7  | 21.2 | 729.4   |
| 81 | U | 8388 | 3.24 | 356.3   | 46.0  | 8389 | 2.36 | 69.5   | 20.1 | 286.8   |
| 82 | C | 8372 | 4.48 | 3483.7  | 131.6 | 8369 | 3.11 | 908.2  | 24.7 | 2575.5  |
| 83 | A | 8355 | 4.39 | 32095.4 | 144.4 | 8354 | 3.11 | 1288.6 | 30.9 | 30806.8 |
| 84 | C | 8338 | 4.50 | 18392.1 | 170.3 | 8336 | 3.44 | 1082.9 | 30.6 | 17309.2 |
| 85 | C | 8320 | 4.70 | 14992.9 | 229.7 | 8318 | 4.45 | 2394.0 | 35.8 | 12598.9 |
| 86 | C | 8303 | 4.33 | 42265.4 | 278.9 | 8301 | 4.21 | 4658.1 | 52.2 | 37607.3 |
| 87 | A | 8288 | 4.44 | 33048.7 | 308.8 | 8285 | 3.68 | 1822.8 | 46.4 | 31225.9 |
| 88 | A | 8271 | 4.57 | 26788.6 | 236.0 | 8269 | 2.91 | 1454.9 | 25.8 | 25333.7 |
| 89 | U | 8255 | 3.24 | 2970.3  | 100.6 | 8253 | 2.36 | 271.4  | 21.1 | 2698.9  |
| 90 | U | 8239 | 3.24 | 2694.2  | 61.0  | 8238 | 2.36 | 548.3  | 26.3 | 2145.9  |
| 91 | C | 8223 | 3.44 | 4880.6  | 64.2  | 8220 | 3.11 | 1909.7 | 20.4 | 2970.9  |
| 92 | U | 8206 | 3.24 | 492.5   | 72.1  | 8203 | 2.36 | 285.6  | 26.0 | 206.9   |
| 93 | C | 8190 | 4.62 | 4639.4  | 248.6 | 8186 | 3.52 | 1429.9 | 41.1 | 3209.4  |
| 94 | A | 8171 | 4.49 | 44136.8 | 293.0 | 8169 | 4.36 | 3582.2 | 44.2 | 40554.7 |
| 95 | U | 8155 | 3.87 | 6525.9  | 81.7  | 8153 | 4.46 | 3149.4 | 28.8 | 3376.5  |
| 96 | G | 8140 | 3.53 | 2129.7  | 82.4  | 8138 | 4.06 | 1069.3 | 27.2 | 1060.4  |
| 97 | G | 8124 | 3.24 | 506.4   | 58.0  | 8121 | 3.76 | 184.5  | 25.0 | 321.8   |

|     |   |      |      |         |       |      |      |        |      |         |
|-----|---|------|------|---------|-------|------|------|--------|------|---------|
| 98  | U | 8106 | 3.89 | 3667.5  | 64.5  | 8105 | 3.90 | 2029.6 | 29.1 | 1637.9  |
| 99  | A | 8088 | 4.34 | 7497.7  | 117.5 | 8085 | 3.91 | 2440.2 | 29.7 | 5057.5  |
| 100 | G | 8073 | 4.57 | 3.9     | 65.8  | 8072 | 2.36 | 0.0    | 25.2 | 3.9     |
| 101 | C | 8060 | 3.99 | 3696.1  | 49.3  | 8058 | 4.21 | 1791.3 | 26.8 | 1904.8  |
| 102 | G | 8046 | 3.24 | 1476.4  | 64.4  | 8043 | 3.11 | 300.1  | 30.2 | 1176.3  |
| 103 | C | 8029 | 4.00 | 6990.5  | 85.2  | 8027 | 3.97 | 1397.8 | 30.7 | 5592.7  |
| 104 | C | 8012 | 3.99 | 11155.3 | 105.5 | 8010 | 3.86 | 2617.9 | 42.7 | 8537.4  |
| 105 | U | 7996 | 3.24 | 1888.2  | 57.0  | 7995 | 2.94 | 1036.6 | 28.1 | 851.6   |
| 106 | G | 7982 | 3.24 | 415.6   | 69.0  | 7977 | 2.36 | 379.3  | 25.6 | 36.4    |
| 107 | U | 7965 | 3.59 | 8000.3  | 63.1  | 7963 | 3.93 | 2887.2 | 27.3 | 5113.0  |
| 108 | G | 7951 | 3.54 | 3281.9  | 65.7  | 7948 | 3.96 | 1787.0 | 31.6 | 1495.0  |
| 109 | C | 7935 | 3.38 | 3270.3  | 61.7  | 7933 | 3.40 | 1582.9 | 24.1 | 1687.4  |
| 110 | U | 7918 | 3.51 | 3998.8  | 61.4  | 7917 | 3.64 | 2330.1 | 34.0 | 1668.7  |
| 111 | U | 7902 | 3.79 | 6010.4  | 77.5  | 7900 | 3.62 | 1908.5 | 42.2 | 4101.9  |
| 112 | C | 7885 | 4.00 | 12245.7 | 130.7 | 7883 | 3.95 | 4358.6 | 66.5 | 7887.1  |
| 113 | G | 7870 | 4.37 | 2662.9  | 91.0  | 7868 | 4.38 | 1196.5 | 42.5 | 1466.4  |
| 114 | G | 7854 | 3.44 | 1147.5  | 66.0  | 7851 | 2.38 | 431.6  | 29.7 | 715.9   |
| 115 | U | 7837 | 4.04 | 6206.5  | 63.7  | 7835 | 3.95 | 2891.7 | 29.4 | 3314.8  |
| 116 | U | 7822 | 4.04 | 8660.3  | 55.9  | 7820 | 3.93 | 4349.1 | 33.4 | 4311.3  |
| 117 | A | 7807 | 3.92 | 4920.7  | 48.4  | 7805 | 2.38 | 0.0    | 26.9 | 4920.7  |
| 118 | C | 7792 | 4.02 | 4063.7  | 44.3  | 7790 | 3.99 | 1826.8 | 27.3 | 2236.9  |
| 119 | U | 7777 | 4.09 | 4319.4  | 40.3  | 7775 | 3.78 | 2090.0 | 42.7 | 2229.5  |
| 120 | U | 7761 | 3.82 | 1556.0  | 49.0  | 7759 | 2.38 | 715.2  | 27.4 | 840.8   |
| 121 | C | 7746 | 3.55 | 801.8   | 39.1  | 7743 | 2.38 | 178.4  | 15.6 | 623.4   |
| 122 | U | 7728 | 3.59 | 3442.0  | 57.8  | 7727 | 3.03 | 998.1  | 30.1 | 2443.9  |
| 123 | A | 7712 | 4.42 | 31979.5 | 196.4 | 7710 | 4.23 | 3957.9 | 48.0 | 28021.6 |
| 124 | A | 7695 | 4.37 | 34549.0 | 187.2 | 7693 | 4.09 | 3596.2 | 45.1 | 30952.8 |
| 125 | G | 7681 | 4.27 | 2336.2  | 70.4  | 7678 | 3.95 | 107.6  | 40.3 | 2228.6  |
| 126 | G | 7667 | 4.23 | 6063.1  | 71.7  | 7664 | 3.78 | 2665.7 | 55.2 | 3397.4  |
| 127 | A | 7652 | 4.37 | 4917.7  | 77.5  | 7649 | 3.33 | 1273.6 | 26.0 | 3644.1  |
| 128 | A | 7634 | 4.56 | 2721.8  | 59.0  | 7632 | 3.78 | 643.6  | 25.5 | 2078.2  |
| 129 | G | 7620 | 4.10 | 4899.3  | 63.1  | 7619 | 3.61 | 1764.3 | 29.4 | 3135.1  |
| 130 | U | 7606 | 3.67 | 1375.7  | 45.5  | 7602 | 2.38 | 392.2  | 24.2 | 983.4   |
| 131 | C | 7590 | 3.44 | 1023.6  | 48.9  | 7588 | 2.48 | 366.7  | 22.5 | 657.0   |
| 132 | C | 7573 | 3.89 | 4224.6  | 62.2  | 7572 | 3.48 | 1918.8 | 24.6 | 2305.8  |
| 133 | A | 7558 | 4.04 | 24558.9 | 120.7 | 7554 | 2.38 | 432.8  | 33.5 | 24126.0 |
| 134 | C | 7541 | 3.98 | 10112.3 | 104.1 | 7539 | 3.33 | 2440.2 | 32.2 | 7672.1  |
| 135 | A | 7525 | 3.44 | 4753.9  | 69.9  | 7522 | 2.83 | 796.4  | 29.8 | 3957.5  |
| 136 | C | 7508 | 3.21 | 4565.4  | 42.0  | 7506 | 3.57 | 2388.1 | 28.0 | 2177.3  |
| 137 | A | 7493 | 3.51 | 10287.9 | 118.2 | 7490 | 3.57 | 1190.5 | 34.4 | 9097.4  |
| 138 | A | 7477 | 4.21 | 27877.3 | 259.6 | 7475 | 3.78 | 3499.4 | 56.0 | 24378.0 |
| 139 | A | 7460 | 3.99 | 36664.9 | 364.7 | 7459 | 3.92 | 4079.7 | 49.6 | 32585.1 |
| 140 | U | 7445 | 3.21 | 619.3   | 74.7  | 7442 | 2.17 | 355.4  | 39.9 | 263.9   |
| 141 | C | 7429 | 3.85 | 16562.3 | 150.0 | 7426 | 3.97 | 3607.5 | 40.9 | 12954.8 |
| 142 | A | 7413 | 4.02 | 38379.3 | 234.2 | 7411 | 3.97 | 6294.9 | 38.6 | 32084.4 |
| 143 | A | 7397 | 4.16 | 18228.2 | 149.4 | 7394 | 2.91 | 1297.1 | 46.4 | 16931.1 |
| 144 | G | 7382 | 3.21 | 1208.0  | 85.3  | 7381 | 2.17 | 98.2   | 13.4 | 1109.8  |
| 145 | A | 7365 | 3.21 | 4310.9  | 69.0  | 7361 | 2.17 | 302.8  | 18.2 | 4008.1  |

|     |   |      |      |         |       |      |      |        |      |         |
|-----|---|------|------|---------|-------|------|------|--------|------|---------|
| 146 | U | 7350 | 3.57 | 4282.0  | 89.8  | 7348 | 3.43 | 1815.9 | 35.1 | 2466.1  |
| 147 | C | 7334 | 3.91 | 6571.0  | 40.7  | 7331 | 3.74 | 2013.8 | 30.6 | 4557.2  |
| 148 | C | 7318 | 3.66 | 4357.0  | 54.5  | 7316 | 3.74 | 2562.0 | 26.8 | 1795.0  |
| 149 | G | 7304 | 3.83 | 2176.4  | 56.8  | 7301 | 3.93 | 1198.0 | 34.6 | 978.5   |
| 150 | U | 7288 | 3.91 | 6970.4  | 42.5  | 7286 | 3.77 | 3223.8 | 45.6 | 3746.5  |
| 151 | U | 7273 | 3.77 | 2838.8  | 63.4  | 7271 | 3.06 | 1441.9 | 31.4 | 1396.9  |
| 152 | A | 7257 | 4.02 | 18017.5 | 70.6  | 7254 | 3.72 | 1230.6 | 33.7 | 16786.9 |
| 153 | G | 7242 | 3.88 | 8997.7  | 84.1  | 7241 | 3.78 | 3825.1 | 40.6 | 5172.6  |
| 154 | A | 7228 | 4.01 | 28935.1 | 142.2 | 7225 | 3.74 | 1444.9 | 39.8 | 27490.1 |
| 155 | C | 7211 | 4.02 | 8789.8  | 112.4 | 7209 | 3.78 | 3751.3 | 42.0 | 5038.5  |
| 156 | G | 7196 | 3.78 | 3229.2  | 86.8  | 7195 | 3.97 | 1768.6 | 37.9 | 1460.6  |
| 157 | U | 7182 | 3.21 | 2483.8  | 44.1  | 7180 | 3.57 | 1516.2 | 28.2 | 967.6   |
| 158 | U | 7168 | 3.41 | 3255.3  | 36.7  | 7165 | 3.36 | 2332.4 | 25.9 | 922.9   |
| 159 | U | 7154 | 2.79 | 90.2    | 29.8  | 7152 | 2.46 | 100.7  | 31.4 | -10.6   |
| 160 | C | 7136 | 4.09 | 9366.7  | 85.9  | 7134 | 4.12 | 4709.4 | 43.4 | 4657.3  |
| 161 | A | 7120 | 3.98 | 20052.4 | 125.5 | 7118 | 3.95 | 2972.7 | 47.9 | 17079.6 |
| 162 | G | 7105 | 2.79 | 886.8   | 44.6  | 7103 | 1.89 | 98.8   | 17.7 | 787.9   |
| 163 | C | 7091 | 2.79 | 830.7   | 36.7  | 7088 | 1.91 | 209.7  | 16.1 | 621.1   |
| 164 | U | 7077 | 3.13 | 1629.2  | 39.4  | 7075 | 2.25 | 664.8  | 19.5 | 964.4   |
| 165 | U | 7062 | 2.83 | 1125.8  | 46.1  | 7059 | 1.65 | 267.9  | 16.7 | 857.9   |
| 166 | C | 7044 | 2.79 | 2399.2  | 60.2  | 7043 | 1.49 | 781.1  | 14.3 | 1618.1  |
| 167 | C | 7029 | 2.79 | 3223.2  | 74.2  | 7027 | 1.46 | 490.4  | 12.6 | 2732.8  |
| 168 | A | 7014 | 3.16 | 5973.6  | 92.7  | 7012 | 1.25 | 0.0    | 7.6  | 5973.6  |
| 169 | A | 6999 | 3.79 | 15693.8 | 132.7 | 6997 | 1.25 | 432.7  | 11.2 | 15261.1 |
| 170 | A | 6983 | 3.94 | 24073.8 | 75.7  | 6980 | 1.25 | 160.5  | 28.5 | 23913.3 |
| 171 | A | 6967 | 3.89 | 36733.5 | 188.0 | 6965 | 2.40 | 1437.9 | 45.7 | 35295.5 |
| 172 | C | 6951 | 3.89 | 25660.6 | 237.6 | 6948 | 2.85 | 2579.1 | 42.9 | 23081.4 |
| 173 | A | 6935 | 3.88 | 9789.1  | 150.7 | 6932 | 2.86 | 1940.8 | 40.0 | 7848.4  |
| 174 | G | 6921 | 3.62 | 4920.5  | 79.3  | 6919 | 3.05 | 2638.1 | 50.6 | 2282.4  |
| 175 | A | 6905 | 3.74 | 7844.8  | 70.6  | 6903 | 2.87 | 1972.6 | 46.9 | 5872.1  |
| 176 | A | 6889 | 3.64 | 9054.5  | 69.5  | 6887 | 2.86 | 1822.3 | 35.5 | 7232.2  |
| 177 | G | 6874 | 2.79 | 575.4   | 65.2  | 6872 | 1.60 | 261.2  | 31.8 | 314.2   |
| 178 | A | 6860 | 3.41 | 7813.8  | 73.5  | 6858 | 3.49 | 2644.9 | 45.9 | 5169.0  |
| 179 | A | 6844 | 3.45 | 6133.0  | 62.1  | 6842 | 3.54 | 1989.6 | 37.5 | 4143.4  |
| 180 | U | 6829 | 3.31 | 3104.3  | 47.4  | 6827 | 3.53 | 1965.4 | 23.1 | 1138.9  |
| 181 | G | 6814 | 2.83 | 0.0     | 39.8  | 6812 | 3.96 | 339.5  | 42.6 | -339.5  |
| 182 | U | 6799 | 3.59 | 4104.9  | 49.0  | 6797 | 3.70 | 2968.1 | 50.8 | 1136.8  |
| 183 | G | 6786 | 3.47 | 3422.1  | 40.3  | 6784 | 3.57 | 2681.2 | 32.4 | 740.8   |
| 184 | A | 6770 | 3.51 | 4057.2  | 42.7  | 6768 | 3.90 | 1744.8 | 27.5 | 2312.5  |
| 185 | G | 6756 | 3.88 | 4758.4  | 79.2  | 6754 | 3.80 | 2576.4 | 29.0 | 2182.1  |
| 186 | A | 6740 | 3.78 | 9608.3  | 105.1 | 6738 | 3.26 | 1617.2 | 29.7 | 7991.1  |
| 187 | A | 6725 | 3.83 | 27358.3 | 122.0 | 6723 | 3.71 | 2598.3 | 39.7 | 24760.1 |
| 188 | G | 6711 | 3.93 | 3763.7  | 62.0  | 6710 | 3.62 | 1961.6 | 34.4 | 1802.1  |
| 189 | G | 6698 | 2.96 | 1427.9  | 43.1  | 6697 | 3.26 | 420.1  | 18.7 | 1007.8  |
| 190 | C | 6684 | 3.43 | 786.7   | 42.0  | 6682 | 3.26 | 52.1   | 23.5 | 734.6   |
| 191 | U | 6669 | 3.32 | 2701.0  | 37.7  | 6668 | 4.06 | 2173.8 | 26.3 | 527.2   |
| 192 | U | 6655 | 2.83 | 0.0     | 29.8  | 6652 | 4.36 | 319.2  | 18.9 | -319.2  |
| 193 | C | 6640 | 2.94 | 1727.0  | 59.8  | 6637 | 4.16 | 1791.6 | 30.9 | -64.6   |

|     |   |      |      |         |       |      |      |        |      |         |
|-----|---|------|------|---------|-------|------|------|--------|------|---------|
| 194 | C | 6623 | 3.78 | 11739.0 | 101.9 | 6622 | 4.06 | 3800.9 | 33.2 | 7938.0  |
| 195 | A | 6608 | 3.64 | 12729.1 | 84.0  | 6606 | 4.02 | 2759.8 | 27.7 | 9969.3  |
| 196 | C | 6592 | 3.25 | 3349.8  | 58.6  | 6591 | 4.06 | 2360.4 | 26.6 | 989.5   |
| 197 | U | 6578 | 3.54 | 4077.7  | 66.7  | 6576 | 3.89 | 2925.8 | 27.1 | 1151.9  |
| 198 | A | 6563 | 3.78 | 5238.3  | 47.9  | 6561 | 4.06 | 953.4  | 29.1 | 4285.0  |
| 199 | A | 6547 | 3.64 | 9871.5  | 60.3  | 6545 | 3.97 | 4448.5 | 33.3 | 5423.0  |
| 200 | G | 6534 | 3.53 | 3298.4  | 46.5  | 6532 | 3.92 | 2606.2 | 33.6 | 692.1   |
| 201 | G | 6521 | 3.78 | 3483.0  | 45.1  | 6518 | 3.90 | 2124.3 | 29.0 | 1358.7  |
| 202 | C | 6507 | 3.83 | 107.7   | 35.8  | 6504 | 3.91 | 85.0   | 29.9 | 22.7    |
| 203 | U | 6492 | 3.58 | 6083.3  | 52.8  | 6490 | 3.46 | 3483.3 | 56.1 | 2600.0  |
| 204 | A | 6479 | 3.64 | 9877.8  | 92.0  | 6477 | 3.26 | 1465.7 | 44.6 | 8412.1  |
| 205 | A | 6464 | 3.74 | 23769.1 | 145.0 | 6461 | 3.46 | 1430.9 | 31.8 | 22338.2 |
| 206 | C | 6448 | 3.26 | 4380.0  | 96.9  | 6446 | 3.19 | 1417.9 | 26.0 | 2962.2  |
| 207 | U | 6433 | 3.01 | 448.7   | 53.3  | 6432 | 3.10 | 313.6  | 25.2 | 135.0   |
| 208 | C | 6419 | 3.36 | 6206.8  | 72.8  | 6417 | 3.44 | 2699.2 | 30.5 | 3507.6  |
| 209 | U | 6404 | 3.01 | 440.0   | 52.8  | 6403 | 3.10 | 399.1  | 35.4 | 41.0    |
| 210 | C | 6389 | 3.48 | 4757.6  | 55.5  | 6387 | 3.35 | 2717.5 | 47.7 | 2040.2  |
| 211 | A | 6375 | 3.48 | 17779.5 | 63.9  | 6373 | 3.10 | 1888.9 | 38.1 | 15890.5 |
| 212 | A | 6360 | 3.35 | 10782.3 | 90.7  | 6357 | 3.34 | 1199.9 | 33.0 | 9582.4  |
| 213 | C | 6344 | 3.01 | 4110.3  | 84.4  | 6342 | 3.57 | 2700.2 | 31.0 | 1410.1  |
| 214 | A | 6330 | 3.36 | 11082.2 | 115.4 | 6327 | 3.50 | 2383.7 | 34.0 | 8698.5  |
| 215 | G | 6316 | 3.41 | 5966.5  | 92.5  | 6315 | 3.48 | 3159.1 | 33.2 | 2807.4  |
| 216 | A | 6302 | 3.01 | 8178.0  | 88.4  | 6298 | 3.10 | 607.8  | 29.5 | 7570.2  |
| 217 | C | 6287 | 3.21 | 10256.1 | 188.0 | 6285 | 4.15 | 3008.4 | 52.3 | 7247.7  |
| 218 | A | 6272 | 3.76 | 33717.8 | 94.8  | 6270 | 3.86 | 5861.0 | 73.5 | 27856.7 |
| 219 | A | 6257 | 3.71 | 10726.3 | 183.0 | 6255 | 3.64 | 510.5  | 65.4 | 10215.9 |
| 220 | C | 6242 | 3.44 | 30222.9 | 170.9 | 6240 | 3.91 | 4908.2 | 50.5 | 25314.7 |
| 221 | A | 6228 | 3.26 | 15893.4 | 112.1 | 6226 | 3.85 | 3615.4 | 35.9 | 12278.0 |
| 222 | A | 6214 | 3.01 | 2478.9  | 141.2 | 6210 | 3.85 | 271.0  | 31.4 | 2207.9  |
| 223 | C | 6199 | 3.15 | 13025.5 | 182.3 | 6197 | 3.57 | 2546.9 | 32.2 | 10478.6 |
| 224 | A | 6183 | 3.36 | 15516.0 | 174.4 | 6181 | 3.10 | 1426.5 | 37.9 | 14089.5 |
| 225 | C | 6167 | 3.01 | 2298.9  | 88.6  | 6165 | 3.10 | 434.3  | 34.4 | 1864.6  |
| 226 | C | 6152 | 3.33 | 9245.6  | 145.8 | 6149 | 3.86 | 2638.0 | 36.5 | 6607.6  |
| 227 | U | 6139 | 3.71 | 6001.9  | 67.9  | 6136 | 3.59 | 2928.8 | 31.5 | 3073.1  |
| 228 | G | 6126 | 3.61 | 84.7    | 58.9  | 6124 | 2.04 | 0.0    | 25.8 | 84.7    |
| 229 | C | 6113 | 3.21 | 7361.1  | 74.4  | 6111 | 2.68 | 1302.3 | 29.2 | 6058.8  |
| 230 | U | 6100 | 3.21 | 7377.0  | 71.9  | 6098 | 3.05 | 2990.0 | 40.9 | 4387.0  |
| 231 | U | 6085 | 2.81 | 1802.2  | 75.4  | 6085 | 2.49 | 734.9  | 41.2 | 1067.3  |
| 232 | C | 6071 | 3.27 | 9213.9  | 91.6  | 6069 | 2.71 | 2472.4 | 42.8 | 6741.5  |
| 233 | A | 6056 | 3.32 | 15129.2 | 88.3  | 6054 | 2.52 | 1341.1 | 32.5 | 13788.1 |
| 234 | U | 6041 | 2.96 | 2346.8  | 63.9  | 6038 | 2.18 | 572.2  | 26.6 | 1774.5  |
| 235 | C | 6025 | 3.36 | 11153.3 | 71.5  | 6023 | 2.65 | 1660.7 | 30.7 | 9492.6  |
| 236 | A | 6009 | 3.36 | 11943.0 | 66.5  | 6007 | 2.90 | 2502.0 | 35.3 | 9441.0  |
| 237 | G | 5996 | 3.46 | 9329.2  | 58.2  | 5993 | 3.04 | 2481.1 | 26.9 | 6848.1  |
| 238 | C | 5982 | 3.31 | 4683.8  | 67.4  | 5980 | 2.55 | 1004.0 | 24.6 | 3679.8  |
| 239 | U | 5969 | 2.98 | 658.6   | 49.3  | 5965 | 2.04 | 109.6  | 17.2 | 549.0   |
| 240 | G | 5958 | 2.81 | 511.6   | 42.9  | 5956 | 2.04 | 117.9  | 12.4 | 393.6   |
| 241 | U | 5945 | 2.51 | 1448.9  | 31.6  | 5943 | 2.04 | 440.2  | 13.6 | 1008.7  |

|     |   |      |      |         |       |      |      |        |       |         |
|-----|---|------|------|---------|-------|------|------|--------|-------|---------|
| 242 | U | 5931 | 2.51 | 293.1   | 37.8  | 5929 | 2.17 | 284.0  | 20.0  | 9.1     |
| 243 | C | 5915 | 3.06 | 5927.0  | 95.8  | 5913 | 2.94 | 1595.7 | 23.6  | 4331.3  |
| 244 | C | 5900 | 3.32 | 14987.7 | 133.8 | 5898 | 3.19 | 2564.7 | 43.9  | 12423.0 |
| 245 | A | 5886 | 3.46 | 21704.3 | 167.6 | 5883 | 3.44 | 4293.9 | 35.8  | 17410.4 |
| 246 | G | 5874 | 3.51 | 9296.5  | 97.9  | 5872 | 3.39 | 4659.2 | 27.7  | 4637.3  |
| 247 | A | 5861 | 3.51 | 4436.9  | 67.4  | 5858 | 2.54 | 849.8  | 40.8  | 3587.1  |
| 248 | G | 5850 | 3.51 | 3700.8  | 70.5  | 5848 | 3.28 | 795.5  | 39.1  | 2905.3  |
| 249 | A | 5837 | 3.51 | 31475.4 | 138.5 | 5834 | 3.23 | 1749.9 | 42.5  | 29725.5 |
| 250 | A | 5822 | 2.51 | 2008.0  | 129.5 | 5820 | 2.49 | 0.0    | 17.5  | 2008.0  |
| 251 | C | 5808 | 2.91 | 4298.8  | 69.1  | 5805 | 2.54 | 323.1  | 12.2  | 3975.7  |
| 252 | C | 5793 | 3.17 | 6438.1  | 89.1  | 5791 | 2.28 | 322.0  | 25.5  | 6116.1  |
| 253 | C | 5778 | 3.46 | 18389.0 | 120.5 | 5775 | 2.89 | 1631.1 | 29.5  | 16758.0 |
| 254 | C | 5764 | 3.53 | 1428.8  | 64.4  | 5761 | 2.47 | 618.8  | 40.8  | 810.0   |
| 255 | C | 5748 | 2.91 | 4426.3  | 57.7  | 5745 | 3.09 | 2377.9 | 59.2  | 2048.5  |
| 256 | A | 5734 | 2.91 | 5731.2  | 67.3  | 5732 | 3.14 | 2576.8 | 51.8  | 3154.4  |
| 257 | U | 5721 | 2.91 | 655.4   | 56.0  | 5719 | 3.54 | 344.1  | 23.3  | 311.2   |
| 258 | C | 5706 | 3.11 | 4343.0  | 39.2  | 5704 | 3.38 | 2869.6 | 29.3  | 1473.3  |
| 259 | A | 5692 | 3.21 | 2186.8  | 44.9  | 5691 | 3.54 | 629.4  | 47.4  | 1557.5  |
| 260 | U | 5679 | 3.46 | 3923.0  | 53.5  | 5678 | 3.74 | 2696.3 | 34.3  | 1226.8  |
| 261 | G | 5666 | 3.49 | 245.8   | 49.7  | 5665 | 3.75 | 665.7  | 23.2  | -420.0  |
| 262 | C | 5653 | 3.23 | 5194.9  | 54.7  | 5651 | 3.43 | 2728.6 | 35.4  | 2466.3  |
| 263 | C | 5640 | 3.29 | 6592.9  | 52.2  | 5638 | 3.40 | 2341.8 | 24.9  | 4251.1  |
| 264 | U | 5626 | 3.56 | 80.6    | 28.5  | 5624 | 2.20 | 0.0    | 20.9  | 80.6    |
| 265 | C | 5612 | 3.37 | 6114.3  | 56.7  | 5610 | 3.39 | 3059.8 | 49.8  | 3054.5  |
| 266 | U | 5599 | 2.91 | 941.4   | 42.7  | 5599 | 2.20 | 259.6  | 26.7  | 681.8   |
| 267 | C | 5584 | 3.16 | 2169.9  | 41.7  | 5583 | 2.60 | 908.3  | 28.6  | 1261.6  |
| 268 | C | 5570 | 3.18 | 5584.9  | 40.5  | 5568 | 2.80 | 2796.8 | 28.7  | 2788.1  |
| 269 | U | 5556 | 2.91 | 1256.4  | 47.3  | 5552 | 2.20 | 75.6   | 21.0  | 1180.8  |
| 270 | C | 5543 | 2.91 | 1297.5  | 92.1  | 5542 | 2.20 | 106.9  | 25.3  | 1190.6  |
| 271 | A | 5530 | 3.46 | 25862.6 | 199.7 | 5527 | 2.95 | 2131.4 | 45.4  | 23731.2 |
| 272 | A | 5516 | 3.54 | 30114.8 | 243.1 | 5513 | 2.71 | 1490.0 | 44.1  | 28624.8 |
| 273 | C | 5502 | 3.31 | 3904.1  | 109.7 | 5499 | 2.20 | 294.0  | 20.5  | 3610.1  |
| 274 | C | 5487 | 3.17 | 3955.2  | 37.0  | 5484 | 3.04 | 1527.7 | 31.0  | 2427.5  |
| 275 | U | 5474 | 3.16 | 5745.6  | 38.8  | 5472 | 3.20 | 3531.7 | 37.2  | 2213.9  |
| 276 | G | 5461 | 2.60 | 1442.9  | 48.5  | 5460 | 2.20 | 578.1  | 31.7  | 864.8   |
| 277 | C | 5448 | 2.54 | 1606.7  | 28.4  | 5445 | 2.20 | 766.6  | 18.5  | 840.1   |
| 278 | U | 5434 | 3.73 | 1335.0  | 79.9  | 5431 | 2.20 | 317.9  | 30.8  | 1017.1  |
| 279 | U | 5419 | 3.12 | 12591.2 | 326.2 | 5418 | 4.50 | 1812.5 | 80.2  | 10778.7 |
| 280 | C | 5407 | 3.54 | 65704.1 | 620.0 | 5404 | 3.95 | 4217.2 | 139.2 | 61486.9 |
| 281 | A | 5393 | 3.74 | 12353.9 | 178.8 | 5390 | 2.20 | 695.2  | 35.1  | 11658.7 |
| 282 | G | 5382 | 2.54 | 2377.8  | 55.6  | 5381 | 2.20 | 452.7  | 33.6  | 1925.1  |
| 283 | U | 5371 | 3.35 | 4159.9  | 53.4  | 5368 | 2.44 | 1524.9 | 28.2  | 2635.0  |
| 284 | A | 5357 | 3.02 | 2187.2  | 52.9  | 5355 | 2.20 | 1.4    | 14.3  | 2185.8  |
| 285 | C | 5343 | 3.78 | 1543.8  | 76.4  | 5340 | 3.20 | 55.9   | 14.5  | 1487.8  |
| 286 | C | 5329 | 3.61 | 22242.3 | 200.8 | 5327 | 3.08 | 3257.7 | 40.3  | 18984.6 |
| 287 | A | 5316 | 3.34 | 26341.5 | 221.9 | 5313 | 2.20 | 534.8  | 27.1  | 25806.8 |
| 288 | C | 5302 | 2.54 | 515.4   | 123.4 | 5298 | 3.23 | 182.0  | 18.6  | 333.4   |
| 289 | C | 5287 | 3.08 | 4501.5  | 43.1  | 5285 | 3.27 | 1678.1 | 28.8  | 2823.4  |

|     |   |      |      |         |       |      |      |        |       |         |
|-----|---|------|------|---------|-------|------|------|--------|-------|---------|
| 290 | U | 5274 | 2.56 | 782.6   | 41.2  | 5271 | 2.37 | 666.6  | 39.0  | 116.1   |
| 291 | C | 5261 | 2.88 | 3606.8  | 60.8  | 5259 | 3.28 | 1644.3 | 35.6  | 1962.5  |
| 292 | C | 5247 | 3.32 | 11212.8 | 60.7  | 5245 | 3.27 | 3830.4 | 33.5  | 7382.5  |
| 293 | A | 5233 | 3.41 | 20234.2 | 80.1  | 5230 | 3.33 | 1982.0 | 48.0  | 18252.2 |
| 294 | C | 5218 | 3.41 | 19962.1 | 153.1 | 5215 | 3.88 | 4171.3 | 75.3  | 15790.9 |
| 295 | A | 5204 | 3.46 | 37193.2 | 176.1 | 5201 | 3.51 | 6779.5 | 124.5 | 30413.7 |
| 296 | G | 5191 | 3.46 | 4625.0  | 67.7  | 5189 | 2.74 | 2138.0 | 67.2  | 2486.9  |
| 297 | A | 5176 | 3.46 | 30079.6 | 66.9  | 5173 | 3.33 | 3112.8 | 70.8  | 26966.8 |
| 298 | A | 5161 | 3.34 | 27842.5 | 96.3  | 5159 | 3.13 | 3364.1 | 63.6  | 24478.4 |
| 299 | U | 5149 | 2.50 | 2167.9  | 88.1  | 5146 | 2.30 | 1093.3 | 44.5  | 1074.6  |
| 300 | G | 5137 | 2.11 | 52.3    | 22.7  | 5136 | 1.57 | 306.8  | 26.6  | -254.5  |
| 301 | G | 5127 | 3.49 | 1485.9  | 51.2  | 5124 | 3.04 | 816.2  | 33.4  | 669.7   |
| 302 | G | 5115 | 3.04 | 7220.6  | 169.0 | 5114 | 3.14 | 2171.7 | 50.9  | 5048.9  |
| 303 | C | 5103 | 3.46 | 24513.8 | 283.0 | 5100 | 3.33 | 3823.3 | 47.0  | 20690.4 |
| 304 | C | 5091 | 3.72 | 644.0   | 50.5  | 5088 | 3.57 | 28.1   | 11.5  | 615.9   |
| 305 | G | 5078 | 2.66 | 382.0   | 17.5  | 5076 | 1.53 | 75.1   | 11.8  | 306.9   |
| 306 | U | 5066 | 2.46 | 717.0   | 37.7  | 5064 | 1.91 | 337.6  | 20.5  | 379.4   |
| 307 | A | 5051 | 2.92 | 4782.9  | 51.6  | 5049 | 2.73 | 1469.5 | 36.5  | 3313.3  |
| 308 | C | 5036 | 2.83 | 2003.4  | 51.7  | 5032 | 2.40 | 1124.1 | 33.3  | 879.3   |
| 309 | C | 5023 | 2.22 | 899.5   | 85.8  | 5020 | 2.47 | 342.9  | 39.9  | 556.6   |
| 310 | C | 5011 | 3.49 | 11862.6 | 128.5 | 5009 | 3.33 | 3058.2 | 63.7  | 8804.4  |
| 311 | A | 4996 | 3.52 | 35641.7 | 174.8 | 4994 | 3.62 | 2082.8 | 54.2  | 33558.8 |
| 312 | C | 4982 | 3.47 | 30937.2 | 243.0 | 4980 | 3.53 | 4722.0 | 50.3  | 26215.3 |
| 313 | A | 4969 | 2.94 | 5853.1  | 161.7 | 4967 | 2.58 | 1191.6 | 33.6  | 4661.4  |
| 314 | G | 4958 | 2.31 | 490.5   | 35.0  | 4955 | 1.53 | 111.4  | 30.2  | 379.1   |
| 315 | C | 4946 | 2.97 | 3850.3  | 65.0  | 4943 | 2.76 | 2357.3 | 41.7  | 1493.0  |
| 316 | A | 4932 | 3.02 | 5805.5  | 58.2  | 4929 | 3.14 | 2490.1 | 48.9  | 3315.3  |
| 317 | G | 4921 | 3.02 | 3984.2  | 85.6  | 4917 | 3.29 | 2658.3 | 30.9  | 1325.9  |
| 318 | U | 4909 | 3.16 | 8041.5  | 94.8  | 4906 | 3.28 | 5415.3 | 28.0  | 2626.2  |
| 319 | G | 4897 | 2.77 | 502.0   | 47.2  | 4893 | 2.45 | 489.6  | 29.8  | 12.5    |
| 320 | C | 4882 | 3.07 | 6250.2  | 80.2  | 4880 | 3.23 | 4184.0 | 33.4  | 2066.2  |
| 321 | A | 4869 | 3.00 | 5214.8  | 82.6  | 4866 | 3.18 | 2694.7 | 43.2  | 2520.1  |
| 322 | U | 4857 | 3.10 | 3947.1  | 71.4  | 4854 | 3.23 | 2803.1 | 51.3  | 1144.1  |
| 323 | G | 4846 | 3.15 | 5430.8  | 56.9  | 4844 | 3.18 | 3880.4 | 36.9  | 1550.3  |
| 324 | A | 4834 | 2.77 | 1705.7  | 35.4  | 4831 | 2.36 | 815.9  | 26.9  | 889.8   |
| 325 | U | 4823 | 3.68 | 0.2     | 63.6  | 4820 | 2.29 | 0.0    | 28.2  | 0.2     |
| 326 | G | 4811 | 3.34 | 2352.5  | 84.4  | 4809 | 2.78 | 1003.1 | 47.6  | 1349.4  |
| 327 | A | 4800 | 3.36 | 32607.7 | 74.1  | 4798 | 3.02 | 2452.5 | 72.8  | 30155.2 |
| 328 | C | 4786 | 3.42 | 28850.6 | 98.6  | 4784 | 3.61 | 3202.8 | 68.6  | 25647.8 |
| 329 | C | 4772 | 3.34 | 19504.2 | 157.7 | 4769 | 3.58 | 6166.9 | 61.7  | 13337.3 |
| 330 | C | 4759 | 3.29 | 20163.4 | 169.5 | 4756 | 3.33 | 4771.6 | 39.3  | 15391.8 |
| 331 | A | 4747 | 3.22 | 14578.0 | 229.9 | 4743 | 2.88 | 975.6  | 41.7  | 13602.4 |
| 332 | A | 4735 | 3.34 | 30050.5 | 259.3 | 4731 | 3.42 | 3083.3 | 41.9  | 26967.3 |
| 333 | A | 4722 | 3.42 | 37674.6 | 135.2 | 4719 | 3.23 | 4534.9 | 67.7  | 33139.8 |
| 334 | A | 4709 | 3.24 | 20971.2 | 154.1 | 4706 | 2.29 | 999.5  | 50.8  | 19971.6 |
| 335 | C | 4695 | 2.77 | 2851.5  | 139.0 | 4691 | 2.90 | 810.0  | 47.1  | 2041.5  |
| 336 | C | 4683 | 3.32 | 15273.7 | 172.2 | 4680 | 2.89 | 4371.7 | 52.1  | 10902.0 |
| 337 | A | 4670 | 3.32 | 26119.5 | 230.7 | 4668 | 3.04 | 2812.2 | 58.6  | 23307.2 |

|     |   |      |      |         |       |      |      |        |       |         |
|-----|---|------|------|---------|-------|------|------|--------|-------|---------|
| 338 | A | 4657 | 3.13 | 24439.9 | 295.9 | 4654 | 2.70 | 2648.0 | 81.5  | 21791.9 |
| 339 | G | 4645 | 2.77 | 1310.2  | 100.0 | 4641 | 2.29 | 238.8  | 57.9  | 1071.4  |
| 340 | C | 4633 | 2.77 | 6070.3  | 83.3  | 4630 | 2.69 | 2383.9 | 54.2  | 3686.3  |
| 341 | C | 4620 | 3.20 | 1801.4  | 131.5 | 4617 | 2.29 | 829.6  | 40.3  | 971.8   |
| 342 | A | 4608 | 2.97 | 15992.8 | 202.2 | 4605 | 2.29 | 1326.5 | 33.9  | 14666.2 |
| 343 | A | 4595 | 2.92 | 11111.7 | 123.9 | 4592 | 2.45 | 1432.9 | 47.5  | 9678.9  |
| 344 | U | 4583 | 2.70 | 4075.1  | 98.2  | 4580 | 2.69 | 2464.0 | 41.4  | 1611.0  |
| 345 | C | 4570 | 1.88 | 153.6   | 96.6  | 4568 | 2.29 | 307.9  | 48.0  | -154.3  |
| 346 | C | 4558 | 3.15 | 22546.5 | 261.5 | 4555 | 3.14 | 4709.6 | 55.0  | 17836.9 |
| 347 | A | 4545 | 3.27 | 18829.6 | 160.0 | 4542 | 2.55 | 2105.6 | 48.2  | 16723.9 |
| 348 | U | 4532 | 1.94 | 1526.9  | 145.6 | 4528 | 3.64 | 632.9  | 65.6  | 894.0   |
| 349 | C | 4518 | 3.22 | 31523.7 | 140.0 | 4515 | 3.49 | 5510.7 | 51.4  | 26013.1 |
| 350 | U | 4505 | 3.11 | 9188.9  | 136.0 | 4502 | 3.14 | 5887.0 | 64.8  | 3301.9  |
| 351 | G | 4494 | 1.88 | 1474.4  | 48.1  | 4492 | 2.81 | 1544.9 | 44.6  | -70.5   |
| 352 | G | 4483 | 2.03 | 901.0   | 35.7  | 4480 | 2.89 | 1172.3 | 43.7  | -271.3  |
| 353 | U | 4472 | 2.58 | 3507.9  | 62.2  | 4469 | 3.10 | 3294.8 | 56.7  | 213.1   |
| 354 | U | 4459 | 2.73 | 3863.1  | 66.2  | 4456 | 3.04 | 2994.1 | 59.3  | 869.1   |
| 355 | G | 4449 | 2.62 | 3042.4  | 64.3  | 4447 | 3.19 | 2980.1 | 80.0  | 62.3    |
| 356 | G | 4439 | 3.27 | 8480.8  | 107.3 | 4436 | 3.44 | 3862.8 | 57.9  | 4618.0  |
| 357 | U | 4427 | 3.47 | 11061.9 | 134.9 | 4425 | 3.25 | 2887.1 | 66.5  | 8174.8  |
| 358 | C | 4414 | 3.11 | 29163.4 | 383.0 | 4412 | 3.44 | 7461.7 | 92.2  | 21701.7 |
| 359 | A | 4403 | 3.07 | 26005.4 | 298.3 | 4400 | 3.49 | 8404.8 | 87.3  | 17600.5 |
| 360 | U | 4392 | 3.11 | 9722.9  | 116.9 | 4388 | 3.17 | 6219.3 | 105.5 | 3503.7  |
| 361 | U | 4379 | 1.88 | 120.2   | 53.1  | 4376 | 2.29 | 707.2  | 38.0  | -587.0  |
| 362 | U | 4368 | 1.88 | 545.7   | 27.8  | 4365 | 2.29 | 1066.0 | 36.6  | -520.3  |
| 363 | U | 4356 | 1.92 | 1265.9  | 66.7  | 4353 | 3.00 | 1656.6 | 42.7  | -390.7  |
| 364 | A | 4344 | 2.69 | 8134.9  | 115.6 | 4340 | 2.99 | 2912.7 | 57.0  | 5222.3  |
| 365 | C | 4332 | 2.90 | 2285.2  | 197.0 | 4327 | 3.01 | 2719.0 | 57.2  | -433.7  |
| 366 | G | 4323 | 3.63 | 3335.5  | 84.0  | 4319 | 3.84 | 2879.4 | 68.3  | 456.1   |
| 367 | G | 4313 | 3.04 | 2904.3  | 68.4  | 4308 | 3.74 | 1369.4 | 93.3  | 1534.9  |
| 368 | A | 4301 | 3.13 | 1524.4  | 87.8  | 4297 | 2.34 | 0.0    | 26.1  | 1524.4  |
| 369 | C | 4289 | 2.99 | 11785.4 | 159.7 | 4286 | 2.58 | 2732.7 | 46.1  | 9052.7  |
| 370 | A | 4277 | 3.33 | 15405.9 | 236.6 | 4273 | 2.34 | 385.5  | 47.6  | 15020.4 |
| 371 | C | 4262 | 3.33 | 26580.8 | 238.7 | 4258 | 2.96 | 3202.3 | 31.7  | 23378.5 |
| 372 | C | 4250 | 1.33 | 189.4   | 145.4 | 4245 | 2.48 | 30.7   | 47.9  | 158.6   |
| 373 | C | 4237 | 3.48 | 13795.9 | 158.9 | 4233 | 3.34 | 5337.1 | 62.3  | 8458.8  |
| 374 | A | 4225 | 3.42 | 37690.3 | 281.7 | 4222 | 3.10 | 5266.1 | 78.8  | 32424.3 |
| 375 | U | 4213 | 3.04 | 10028.6 | 226.2 | 4211 | 3.09 | 2835.0 | 61.3  | 7193.6  |
| 376 | C | 4201 | 3.13 | 14835.5 | 124.7 | 4197 | 3.44 | 4713.5 | 54.4  | 10122.0 |
| 377 | U | 4189 | 3.37 | 13935.8 | 156.0 | 4185 | 3.20 | 7074.3 | 89.2  | 6861.5  |
| 378 | A | 4177 | 3.09 | 36425.5 | 427.3 | 4174 | 3.15 | 6570.5 | 91.5  | 29855.1 |
| 379 | U | 4167 | 3.13 | 10028.5 | 315.1 | 4163 | 3.54 | 7360.3 | 64.8  | 2668.2  |
| 380 | G | 4156 | 3.53 | 5523.7  | 198.0 | 4153 | 3.14 | 3252.9 | 138.1 | 2270.8  |
| 381 | A | 4145 | 2.46 | 4247.1  | 83.9  | 4143 | 2.34 | 1712.3 | 49.2  | 2534.8  |
| 382 | U | 4132 | 1.45 | 567.6   | 37.3  | 4130 | 2.34 | 1176.1 | 36.4  | -608.6  |
| 383 | U | 4121 | 1.33 | 549.4   | 24.2  | 4118 | 2.77 | 1076.1 | 34.3  | -526.7  |
| 384 | C | 4110 | 2.49 | 2090.2  | 149.0 | 4106 | 2.65 | 2414.0 | 43.6  | -323.8  |
| 385 | C | 4100 | 4.77 | 924.9   | 243.9 | 4100 | 2.34 | 1155.4 | 55.0  | -230.5  |

|     |   |      |      |         |       |      |      |        |       |         |
|-----|---|------|------|---------|-------|------|------|--------|-------|---------|
| 386 | G | 4090 | 4.56 | 10796.8 | 198.0 | 4090 | 4.50 | 9664.9 | 159.6 | 1131.9  |
| 387 | U | 4078 | 2.55 | 2544.2  | 123.8 | 4074 | 4.50 | 1470.5 | 201.5 | 1073.7  |
| 388 | A | 4067 | 2.98 | 10483.8 | 137.6 | 4064 | 2.95 | 5243.4 | 77.5  | 5240.4  |
| 389 | U | 4058 | 3.18 | 6075.1  | 150.4 | 4055 | 2.70 | 3258.6 | 62.8  | 2816.5  |
| 390 | A | 4047 | 3.46 | 11989.3 | 106.5 | 4042 | 3.09 | 73.9   | 74.7  | 11915.4 |
| 391 | C | 4034 | 3.22 | 34167.7 | 287.9 | 4030 | 3.05 | 4377.4 | 98.9  | 29790.3 |
| 392 | A | 4023 | 3.46 | 43794.8 | 559.9 | 4021 | 2.76 | 3171.9 | 60.4  | 40622.8 |
| 393 | C | 4010 | 3.69 | 9487.5  | 234.3 | 4006 | 2.56 | 1714.4 | 52.5  | 7773.0  |
| 394 | C | 3997 | 3.10 | 11202.7 | 94.9  | 3994 | 2.76 | 3245.8 | 51.3  | 7956.9  |
| 395 | U | 3987 | 2.79 | 3945.7  | 114.2 | 3983 | 2.95 | 2048.7 | 66.3  | 1897.0  |
| 396 | U | 3977 | 3.18 | 13978.5 | 189.1 | 3973 | 2.95 | 6779.5 | 86.7  | 7199.0  |
| 397 | A | 3965 | 3.32 | 38246.0 | 196.8 | 3962 | 2.95 | 7608.6 | 79.2  | 30637.4 |
| 398 | U | 3954 | 3.46 | 9061.0  | 138.8 | 3950 | 2.95 | 3921.9 | 80.9  | 5139.1  |
| 399 | C | 3941 | 3.22 | 25338.1 | 212.6 | 3938 | 2.85 | 6754.1 | 96.1  | 18584.0 |
| 400 | A | 3930 | 3.46 | 26341.8 | 331.6 | 3924 | 2.46 | 2942.1 | 98.8  | 23399.7 |
| 401 | A | 3918 | 3.41 | 50283.2 | 376.3 | 3915 | 2.71 | 7897.0 | 98.1  | 42386.1 |
| 402 | A | 3907 | 3.06 | 23421.4 | 260.6 | 3904 | 1.90 | 0.0    | 55.1  | 23421.4 |
| 403 | U | 3897 | 3.16 | 4834.2  | 191.8 | 3892 | 1.90 | 805.2  | 31.0  | 4029.0  |
| 404 | G | 3886 | 3.63 | 1962.2  | 126.6 | 3881 | 1.90 | 0.0    | 65.2  | 1962.2  |
| 405 | U | 3876 | 2.46 | 1254.4  | 281.4 | 3870 | 1.90 | 4213.3 | 123.2 | -2958.9 |
| 406 | C | 3865 | 3.55 | 69795.2 | 511.3 | 3861 | 3.47 | 4969.0 | 130.1 | 64826.1 |
| 407 | G | 3854 | 3.69 | 3415.3  | 142.0 | 3850 | 3.07 | 1039.2 | 105.6 | 2376.0  |
| 408 | C | 3842 | 2.46 | 1591.3  | 56.0  | 3839 | 2.31 | 1220.1 | 52.2  | 371.2   |
| 409 | C | 3829 | 2.94 | 2423.6  | 56.7  | 3825 | 3.13 | 2140.3 | 40.5  | 283.3   |
| 410 | U | 3818 | 2.47 | 3385.0  | 74.0  | 3814 | 3.10 | 3242.9 | 56.0  | 142.1   |
| 411 | A | 3808 | 3.35 | 12151.6 | 167.2 | 3804 | 3.00 | 6989.1 | 67.0  | 5162.5  |
| 412 | U | 3795 | 3.78 | 2693.0  | 145.6 | 3795 | 2.97 | 1501.2 | 71.3  | 1191.8  |
| 413 | G | 3782 | 3.97 | 6230.2  | 165.0 | 3786 | 4.50 | 2592.8 | 318.5 | 3637.4  |
| 414 | U | 3769 | 3.78 | 27293.9 | 289.8 | 3765 | 4.50 | 3563.9 | 298.8 | 23730.0 |
| 415 | A | 3758 | 2.45 | 3781.6  | 109.3 | 3753 | 2.27 | 1802.0 | 68.3  | 1979.6  |
| 416 | C | 3748 | 3.40 | 3681.9  | 76.5  | 3743 | 3.07 | 1977.7 | 72.0  | 1704.2  |
| 417 | U | 3737 | 3.44 | 12641.1 | 65.4  | 3733 | 3.30 | 4614.0 | 48.7  | 8027.1  |
| 418 | U | 3726 | 2.90 | 3550.3  | 132.6 | 3723 | 2.94 | 3133.3 | 65.7  | 417.0   |
| 419 | U | 3716 | 2.21 | 3.9     | 92.9  | 3712 | 1.99 | 465.9  | 72.7  | -462.0  |
| 420 | C | 3705 | 3.41 | 28821.6 | 75.6  | 3701 | 3.12 | 5810.9 | 48.1  | 23010.8 |
| 421 | C | 3693 | 2.69 | 3440.7  | 128.6 | 3689 | 1.55 | 124.0  | 40.6  | 3316.7  |
| 422 | A | 3680 | 2.21 | 1481.3  | 27.6  | 3676 | 2.05 | 1025.0 | 28.9  | 456.4   |
| 423 | C | 3668 | 2.45 | 2156.1  | 41.4  | 3664 | 1.55 | 597.6  | 26.1  | 1558.5  |
| 424 | C | 3657 | 3.07 | 1692.4  | 43.1  | 3652 | 1.55 | 264.4  | 19.4  | 1428.0  |
| 425 | U | 3644 | 3.41 | 2518.9  | 23.7  | 3639 | 1.55 | 363.9  | 18.2  | 2155.0  |
| 426 | G | 3634 | 2.21 | 20.2    | 28.9  | 3629 | 1.55 | 0.0    | 18.4  | 20.2    |
| 427 | G | 3623 | 3.31 | 4527.6  | 43.0  | 3619 | 2.22 | 1889.1 | 60.0  | 2638.5  |
| 428 | G | 3611 | 3.41 | 14825.3 | 48.4  | 3606 | 2.36 | 3346.5 | 59.6  | 11478.8 |
| 429 | C | 3600 | 3.41 | 6468.8  | 51.0  | 3594 | 1.55 | 566.5  | 39.9  | 5902.3  |
| 430 | C | 3589 | 3.61 | 1736.0  | 87.9  | 3584 | 3.35 | 508.8  | 61.4  | 1227.3  |
| 431 | A | 3578 | 3.56 | 20617.2 | 45.7  | 3573 | 2.83 | 2892.4 | 83.3  | 17724.8 |
| 432 | C | 3567 | 3.56 | 15672.5 | 43.7  | 3563 | 1.55 | 133.3  | 29.7  | 15539.2 |
| 433 | A | 3556 | 3.40 | 3341.7  | 75.7  | 3552 | 1.98 | 532.0  | 31.7  | 2809.7  |

|     |   |      |      |         |       |      |      |        |      |         |
|-----|---|------|------|---------|-------|------|------|--------|------|---------|
| 434 | A | 3545 | 2.43 | 6348.3  | 141.2 | 3540 | 2.38 | 2577.1 | 94.6 | 3771.1  |
| 435 | U | 3534 | 3.86 | 28543.9 | 286.9 | 3528 | 3.10 | 4732.3 | 89.6 | 23811.6 |
| 436 | C | 3520 | 3.84 | 11923.8 | 344.2 | 3520 | 3.19 | 130.8  | 97.8 | 11793.0 |

### DMS\_example\_2\_peaks.txt

| seqnum | seq | RX.pos | RX.sigma | RX.area | RX.rms | BG.pos | BG.sigma | BG.area | BG.rms | (RX.area-BG.area) |
|--------|-----|--------|----------|---------|--------|--------|----------|---------|--------|-------------------|
| 6      | G   | 9494   | 3.80     | 988.3   | 207.0  | 9492   | 2.65     | 36.8    | 26.3   | 951.5             |
| 7      | A   | 9480   | 5.00     | 17371.3 | 206.1  | 9475   | 1.99     | 718.8   | 17.1   | 16652.6           |
| 8      | A   | 9464   | 5.20     | 22843.4 | 265.6  | 9458   | 1.99     | 0.0     | 45.9   | 22843.4           |
| 9      | C   | 9447   | 5.07     | 33312.0 | 307.0  | 9441   | 4.89     | 6037.1  | 69.7   | 27274.9           |
| 10     | U   | 9432   | 4.85     | 12214.6 | 215.6  | 9426   | 4.43     | 3511.2  | 39.2   | 8703.4            |
| 11     | U   | 9413   | 5.55     | 18.2    | 254.8  | 9408   | 3.45     | 343.1   | 48.8   | -324.9            |
| 12     | C   | 9395   | 5.05     | 29128.5 | 305.8  | 9391   | 5.00     | 6625.5  | 54.1   | 22503.0           |
| 13     | U   | 9379   | 4.76     | 11281.8 | 183.0  | 9375   | 4.87     | 3986.2  | 60.9   | 7295.6            |
| 14     | A   | 9362   | 5.09     | 19754.8 | 187.7  | 9358   | 3.95     | 2029.8  | 34.0   | 17724.9           |
| 15     | G   | 9346   | 2.66     | 1378.2  | 102.7  | 9342   | 2.73     | 353.2   | 25.7   | 1025.0            |
| 16     | U   | 9330   | 3.91     | 2101.6  | 63.0   | 9325   | 3.17     | 591.1   | 21.5   | 1510.5            |
| 17     | A   | 9314   | 4.15     | 6954.1  | 55.9   | 9310   | 4.00     | 2595.5  | 24.2   | 4358.6            |
| 18     | U   | 9298   | 2.56     | 191.3   | 47.4   | 9292   | 2.32     | 524.0   | 29.5   | -332.7            |
| 19     | A   | 9281   | 4.10     | 7274.3  | 65.0   | 9277   | 4.71     | 3376.4  | 49.4   | 3897.8            |
| 20     | U   | 9264   | 3.25     | 2300.3  | 76.5   | 9260   | 4.75     | 1678.8  | 54.3   | 621.6             |
| 21     | U   | 9248   | 3.76     | 4209.4  | 85.4   | 9244   | 2.89     | 1074.2  | 39.7   | 3135.2            |
| 22     | C   | 9230   | 4.65     | 17683.6 | 119.0  | 9225   | 5.00     | 4029.7  | 50.1   | 13653.9           |
| 23     | U   | 9214   | 4.71     | 9983.6  | 121.1  | 9209   | 4.99     | 5214.5  | 46.9   | 4769.1            |
| 24     | G   | 9200   | 4.46     | 5667.4  | 73.3   | 9195   | 4.64     | 3357.2  | 22.5   | 2310.2            |
| 25     | U   | 9183   | 3.06     | 2607.4  | 93.1   | 9180   | 4.24     | 1849.1  | 24.0   | 758.3             |
| 26     | A   | 9167   | 2.56     | 844.0   | 32.4   | 9163   | 1.99     | 95.5    | 19.8   | 748.4             |
| 27     | U   | 9152   | 3.03     | 1984.7  | 61.3   | 9148   | 2.99     | 1060.9  | 22.3   | 923.7             |
| 28     | A   | 9135   | 3.41     | 5546.5  | 71.9   | 9132   | 2.76     | 1120.7  | 19.9   | 4425.9            |
| 29     | C   | 9117   | 3.26     | 4487.9  | 123.3  | 9114   | 1.99     | 116.8   | 18.4   | 4371.0            |
| 30     | C   | 9099   | 4.41     | 16389.0 | 82.5   | 9095   | 1.99     | 997.7   | 12.5   | 15391.3           |
| 31     | U   | 9083   | 4.36     | 5848.5  | 70.7   | 9079   | 1.99     | 1.5     | 16.8   | 5847.0            |
| 32     | A   | 9067   | 4.41     | 20567.3 | 106.4  | 9062   | 1.99     | 726.5   | 17.8   | 19840.8           |
| 33     | A   | 9050   | 4.41     | 15407.6 | 132.1  | 9047   | 2.61     | 927.4   | 35.1   | 14480.3           |
| 34     | U   | 9034   | 4.51     | 7083.1  | 206.3  | 9031   | 3.12     | 1667.3  | 51.1   | 5415.8            |
| 35     | A   | 9016   | 4.31     | 26115.5 | 242.6  | 9013   | 4.24     | 5594.0  | 29.0   | 20521.5           |
| 36     | U   | 9000   | 3.46     | 2993.4  | 134.4  | 8997   | 4.24     | 2582.7  | 24.9   | 410.7             |
| 37     | U   | 8984   | 3.46     | 5718.0  | 170.7  | 8981   | 3.89     | 2895.9  | 25.8   | 2822.0            |
| 38     | A   | 8967   | 4.31     | 23507.9 | 111.4  | 8965   | 3.94     | 2663.2  | 34.0   | 20844.7           |
| 39     | U   | 8951   | 4.36     | 408.4   | 51.4   | 8949   | 1.99     | 88.8    | 30.8   | 319.6             |
| 40     | A   | 8935   | 3.93     | 7168.8  | 71.3   | 8932   | 3.98     | 2173.1  | 33.3   | 4995.7            |
| 41     | G   | 8920   | 3.46     | 2706.0  | 63.5   | 8918   | 4.08     | 1441.4  | 32.6   | 1264.6            |

|    |   |      |      |         |       |      |      |        |      |         |
|----|---|------|------|---------|-------|------|------|--------|------|---------|
| 42 | C | 8903 | 3.46 | 1516.4  | 70.8  | 8899 | 3.04 | 717.5  | 27.8 | 798.9   |
| 43 | C | 8885 | 3.46 | 4912.5  | 59.1  | 8882 | 4.24 | 2965.3 | 32.0 | 1947.2  |
| 44 | U | 8870 | 3.46 | 3282.4  | 47.5  | 8867 | 4.33 | 2651.2 | 28.0 | 631.2   |
| 45 | U | 8854 | 3.46 | 3127.9  | 47.4  | 8851 | 4.44 | 1902.7 | 24.4 | 1225.2  |
| 46 | U | 8838 | 4.46 | 6406.8  | 151.3 | 8835 | 4.44 | 2370.9 | 31.7 | 4036.0  |
| 47 | A | 8821 | 4.36 | 24383.8 | 158.6 | 8818 | 4.01 | 3322.2 | 43.4 | 21061.6 |
| 48 | U | 8805 | 3.46 | 802.9   | 100.3 | 8803 | 1.99 | 246.9  | 24.1 | 556.0   |
| 49 | C | 8788 | 4.35 | 17554.2 | 113.8 | 8785 | 3.88 | 2468.1 | 40.9 | 15086.0 |
| 50 | A | 8771 | 4.50 | 25584.5 | 116.3 | 8767 | 4.03 | 2902.4 | 42.3 | 22682.1 |
| 51 | A | 8754 | 4.50 | 26623.3 | 158.1 | 8751 | 3.79 | 3098.6 | 27.2 | 23524.8 |
| 52 | C | 8736 | 4.50 | 16397.9 | 163.1 | 8733 | 3.51 | 1885.7 | 26.5 | 14512.2 |
| 53 | A | 8719 | 4.50 | 21234.9 | 138.7 | 8716 | 2.81 | 994.0  | 38.6 | 20240.9 |
| 54 | A | 8702 | 4.65 | 31937.3 | 131.4 | 8698 | 4.29 | 2641.0 | 38.7 | 29296.3 |
| 55 | U | 8686 | 4.65 | 9589.9  | 107.4 | 8683 | 4.39 | 4440.7 | 28.6 | 5149.3  |
| 56 | G | 8673 | 3.94 | 5295.3  | 40.9  | 8670 | 4.25 | 2577.0 | 24.2 | 2718.3  |
| 57 | G | 8658 | 3.50 | 372.9   | 40.0  | 8655 | 2.49 | 126.3  | 18.5 | 246.7   |
| 58 | A | 8643 | 3.50 | 3093.2  | 35.6  | 8639 | 2.49 | 430.0  | 16.4 | 2663.2  |
| 59 | A | 8627 | 3.50 | 3059.0  | 29.6  | 8624 | 2.79 | 875.7  | 16.0 | 2183.3  |
| 60 | U | 8610 | 3.50 | 878.5   | 41.7  | 8608 | 2.49 | 213.9  | 15.4 | 664.6   |
| 61 | C | 8594 | 3.90 | 7231.2  | 77.4  | 8590 | 3.04 | 1321.4 | 19.9 | 5909.9  |
| 62 | C | 8576 | 3.50 | 1810.8  | 106.5 | 8575 | 2.49 | 186.3  | 24.3 | 1624.4  |
| 63 | C | 8559 | 4.45 | 22348.5 | 95.2  | 8557 | 3.91 | 2529.5 | 32.0 | 19818.9 |
| 64 | A | 8543 | 4.70 | 27499.8 | 226.7 | 8541 | 4.06 | 2965.8 | 32.5 | 24534.0 |
| 65 | A | 8526 | 4.75 | 24701.7 | 223.0 | 8525 | 4.39 | 2489.2 | 37.5 | 22212.5 |
| 66 | C | 8509 | 4.59 | 34316.2 | 146.9 | 8507 | 4.49 | 4353.9 | 33.9 | 29962.3 |
| 67 | A | 8493 | 4.70 | 28398.4 | 214.3 | 8491 | 4.64 | 3815.2 | 45.0 | 24583.2 |
| 68 | A | 8476 | 4.70 | 30365.0 | 211.0 | 8474 | 4.54 | 6338.2 | 52.5 | 24026.8 |
| 69 | U | 8461 | 3.59 | 4581.7  | 62.6  | 8459 | 4.20 | 1797.3 | 31.1 | 2784.5  |
| 70 | U | 8446 | 4.70 | 9473.3  | 197.6 | 8443 | 4.25 | 2875.0 | 31.2 | 6598.3  |
| 71 | A | 8429 | 4.50 | 28453.2 | 239.5 | 8427 | 4.06 | 3714.2 | 30.9 | 24739.0 |
| 72 | U | 8414 | 3.50 | 4427.4  | 59.3  | 8411 | 3.37 | 1212.1 | 29.0 | 3215.3  |
| 73 | C | 8397 | 3.98 | 7099.4  | 52.3  | 8394 | 3.61 | 2986.7 | 29.9 | 4112.7  |
| 74 | U | 8381 | 3.50 | 1035.0  | 49.5  | 8379 | 2.49 | 34.4   | 21.0 | 1000.7  |
| 75 | C | 8364 | 3.50 | 4048.3  | 41.1  | 8362 | 3.23 | 934.6  | 25.0 | 3113.7  |
| 76 | A | 8349 | 4.23 | 13650.3 | 154.3 | 8346 | 4.27 | 2752.9 | 30.7 | 10897.4 |
| 77 | A | 8333 | 4.53 | 10560.1 | 101.6 | 8330 | 4.01 | 2664.8 | 43.6 | 7895.3  |
| 78 | C | 8316 | 4.13 | 3655.6  | 51.9  | 8314 | 3.96 | 1082.4 | 50.8 | 2573.2  |
| 79 | A | 8299 | 4.18 | 9757.8  | 53.4  | 8297 | 4.57 | 5007.2 | 28.6 | 4750.6  |
| 80 | U | 8284 | 3.88 | 2637.4  | 35.0  | 8282 | 4.16 | 1748.1 | 14.2 | 889.3   |
| 81 | U | 8268 | 3.33 | 154.1   | 25.1  | 8268 | 2.72 | 87.3   | 13.7 | 66.8    |
| 82 | C | 8252 | 3.33 | 2659.3  | 41.0  | 8249 | 2.88 | 527.0  | 17.2 | 2132.3  |
| 83 | A | 8236 | 4.48 | 22992.5 | 159.5 | 8235 | 3.72 | 2054.8 | 40.3 | 20937.7 |
| 84 | C | 8218 | 4.53 | 19438.6 | 147.0 | 8216 | 3.23 | 1526.0 | 38.1 | 17912.6 |
| 85 | C | 8201 | 4.48 | 19020.9 | 168.6 | 8199 | 4.17 | 2538.0 | 41.7 | 16482.9 |
| 86 | C | 8184 | 4.53 | 34982.2 | 196.4 | 8182 | 4.07 | 4960.6 | 49.1 | 30021.7 |
| 87 | A | 8168 | 4.48 | 25345.7 | 204.6 | 8167 | 3.21 | 1209.6 | 34.6 | 24136.0 |
| 88 | A | 8152 | 4.33 | 37823.7 | 195.7 | 8150 | 3.72 | 3400.6 | 41.9 | 34423.1 |
| 89 | U | 8138 | 3.58 | 3954.8  | 115.6 | 8135 | 2.72 | 681.7  | 32.2 | 3273.0  |

|     |   |      |      |         |       |      |      |        |      |         |
|-----|---|------|------|---------|-------|------|------|--------|------|---------|
| 90  | U | 8121 | 3.33 | 3151.0  | 73.5  | 8118 | 2.72 | 844.5  | 27.6 | 2306.5  |
| 91  | C | 8104 | 3.33 | 6415.2  | 65.7  | 8101 | 2.92 | 2202.6 | 27.8 | 4212.7  |
| 92  | U | 8087 | 3.33 | 1613.9  | 72.4  | 8085 | 2.72 | 206.7  | 20.0 | 1407.1  |
| 93  | C | 8070 | 4.01 | 8456.6  | 87.0  | 8068 | 2.76 | 1168.1 | 29.0 | 7288.5  |
| 94  | A | 8053 | 4.23 | 33807.0 | 99.1  | 8051 | 4.14 | 3596.4 | 44.6 | 30210.5 |
| 95  | U | 8037 | 4.23 | 8662.1  | 102.5 | 8034 | 4.14 | 3949.7 | 53.1 | 4712.4  |
| 96  | G | 8022 | 3.54 | 3179.0  | 72.9  | 8020 | 2.91 | 1267.3 | 23.9 | 1911.7  |
| 97  | G | 8006 | 3.33 | 1096.6  | 50.8  | 8004 | 2.72 | 116.2  | 14.4 | 980.4   |
| 98  | U | 7989 | 3.33 | 3198.3  | 62.8  | 7987 | 2.79 | 997.4  | 29.7 | 2200.9  |
| 99  | A | 7971 | 4.01 | 7260.4  | 188.9 | 7967 | 3.50 | 2956.8 | 33.1 | 4303.6  |
| 100 | G | 7956 | 4.56 | 0.0     | 134.9 | 7954 | 2.75 | 11.1   | 16.7 | -11.1   |
| 101 | C | 7942 | 3.86 | 4349.8  | 36.7  | 7941 | 4.11 | 2026.8 | 24.4 | 2323.0  |
| 102 | G | 7929 | 3.56 | 3281.6  | 44.3  | 7927 | 3.24 | 741.9  | 38.5 | 2539.6  |
| 103 | C | 7912 | 4.09 | 13637.2 | 84.8  | 7910 | 3.67 | 1476.1 | 37.8 | 12161.0 |
| 104 | C | 7895 | 4.05 | 15928.2 | 126.4 | 7893 | 3.83 | 3662.8 | 40.2 | 12265.4 |
| 105 | U | 7879 | 2.86 | 2573.2  | 75.2  | 7877 | 2.75 | 1040.6 | 30.5 | 1532.6  |
| 106 | G | 7865 | 2.86 | 1394.3  | 75.5  | 7861 | 2.75 | 453.9  | 36.9 | 940.3   |
| 107 | U | 7849 | 3.81 | 13253.0 | 111.7 | 7847 | 3.87 | 4639.9 | 39.8 | 8613.2  |
| 108 | G | 7834 | 4.01 | 4737.5  | 52.8  | 7831 | 3.01 | 1143.3 | 51.7 | 3594.2  |
| 109 | C | 7818 | 3.86 | 9657.8  | 65.0  | 7817 | 3.70 | 2465.2 | 46.4 | 7192.6  |
| 110 | U | 7802 | 3.62 | 7216.2  | 68.1  | 7800 | 3.87 | 3700.9 | 37.7 | 3515.3  |
| 111 | U | 7787 | 3.86 | 8071.5  | 102.2 | 7784 | 3.77 | 2882.3 | 65.4 | 5189.2  |
| 112 | C | 7769 | 4.05 | 19293.8 | 154.6 | 7766 | 3.87 | 6180.6 | 68.9 | 13113.2 |
| 113 | G | 7754 | 4.14 | 4192.2  | 129.8 | 7752 | 3.01 | 1579.6 | 29.2 | 2612.6  |
| 114 | G | 7738 | 2.86 | 1972.2  | 57.2  | 7736 | 2.75 | 642.0  | 38.9 | 1330.2  |
| 115 | U | 7722 | 3.86 | 8083.7  | 58.8  | 7720 | 3.73 | 3214.6 | 35.2 | 4869.2  |
| 116 | U | 7707 | 3.96 | 10215.5 | 40.3  | 7705 | 3.68 | 4030.4 | 36.0 | 6185.1  |
| 117 | A | 7692 | 3.71 | 4041.3  | 68.3  | 7690 | 2.75 | 0.0    | 28.8 | 4041.3  |
| 118 | C | 7678 | 3.62 | 4087.9  | 53.8  | 7675 | 3.35 | 1630.9 | 18.1 | 2457.0  |
| 119 | U | 7663 | 3.66 | 5185.1  | 48.2  | 7661 | 3.30 | 2408.7 | 24.6 | 2776.4  |
| 120 | U | 7647 | 2.86 | 1710.9  | 43.1  | 7645 | 2.75 | 534.6  | 24.5 | 1176.3  |
| 121 | C | 7630 | 2.86 | 1778.8  | 38.6  | 7628 | 2.75 | 960.0  | 22.6 | 818.8   |
| 122 | U | 7614 | 3.06 | 3447.1  | 78.5  | 7612 | 2.75 | 1081.8 | 27.1 | 2365.4  |
| 123 | A | 7598 | 4.21 | 24690.8 | 133.4 | 7596 | 4.09 | 3700.8 | 47.3 | 20990.1 |
| 124 | A | 7581 | 4.19 | 26104.0 | 88.3  | 7579 | 4.15 | 3812.0 | 34.2 | 22292.0 |
| 125 | G | 7567 | 4.16 | 2289.3  | 42.0  | 7564 | 3.77 | 642.9  | 16.2 | 1646.4  |
| 126 | G | 7553 | 3.81 | 5572.4  | 49.8  | 7551 | 3.53 | 2292.7 | 23.1 | 3279.7  |
| 127 | A | 7538 | 3.59 | 3959.6  | 25.7  | 7536 | 3.06 | 1178.6 | 17.6 | 2781.0  |
| 128 | A | 7522 | 3.68 | 2896.7  | 39.5  | 7519 | 3.66 | 915.9  | 37.1 | 1980.8  |
| 129 | G | 7508 | 3.96 | 9667.7  | 42.2  | 7506 | 3.89 | 3942.5 | 33.3 | 5725.2  |
| 130 | U | 7493 | 3.63 | 1570.6  | 49.5  | 7492 | 2.36 | 206.5  | 19.9 | 1364.1  |
| 131 | C | 7477 | 2.96 | 1337.9  | 33.8  | 7474 | 2.36 | 547.8  | 20.1 | 790.1   |
| 132 | C | 7461 | 3.53 | 4066.1  | 80.6  | 7458 | 2.69 | 1021.4 | 23.8 | 3044.7  |
| 133 | A | 7445 | 3.91 | 18556.3 | 51.9  | 7443 | 2.77 | 918.7  | 25.1 | 17637.7 |
| 134 | C | 7428 | 3.56 | 7731.1  | 85.1  | 7426 | 2.89 | 1762.7 | 20.6 | 5968.4  |
| 135 | A | 7412 | 2.96 | 3920.7  | 64.4  | 7410 | 2.53 | 857.2  | 21.8 | 3063.6  |
| 136 | C | 7396 | 2.96 | 4337.7  | 80.4  | 7394 | 2.69 | 1644.9 | 21.6 | 2692.8  |
| 137 | A | 7380 | 3.38 | 7529.8  | 168.8 | 7378 | 2.51 | 802.6  | 34.0 | 6727.2  |

|     |   |      |      |         |       |      |      |        |      |         |
|-----|---|------|------|---------|-------|------|------|--------|------|---------|
| 138 | A | 7364 | 3.96 | 20518.3 | 217.6 | 7362 | 2.96 | 2255.5 | 48.2 | 18262.8 |
| 139 | A | 7348 | 3.91 | 30440.2 | 244.7 | 7347 | 2.94 | 2888.4 | 41.3 | 27551.8 |
| 140 | U | 7333 | 3.00 | 3298.2  | 72.9  | 7331 | 2.36 | 0.0    | 24.5 | 3298.2  |
| 141 | C | 7317 | 4.05 | 20553.3 | 89.1  | 7314 | 2.94 | 1962.9 | 41.5 | 18590.3 |
| 142 | A | 7301 | 4.11 | 28654.2 | 90.2  | 7299 | 3.34 | 3904.5 | 40.0 | 24749.7 |
| 143 | A | 7285 | 3.96 | 19121.7 | 136.5 | 7283 | 3.06 | 2461.9 | 30.2 | 16659.8 |
| 144 | G | 7271 | 2.96 | 2301.6  | 45.8  | 7269 | 2.36 | 347.8  | 21.3 | 1953.8  |
| 145 | A | 7253 | 3.27 | 4112.6  | 51.1  | 7251 | 2.36 | 331.5  | 20.0 | 3781.2  |
| 146 | U | 7238 | 3.63 | 5513.1  | 51.3  | 7236 | 3.01 | 1776.0 | 25.4 | 3737.0  |
| 147 | C | 7223 | 3.77 | 8495.6  | 45.1  | 7221 | 3.34 | 2153.8 | 34.4 | 6341.9  |
| 148 | C | 7207 | 3.70 | 6033.8  | 60.3  | 7205 | 3.50 | 2656.1 | 23.1 | 3377.7  |
| 149 | G | 7193 | 3.35 | 3528.3  | 32.2  | 7191 | 3.44 | 1306.6 | 21.4 | 2221.8  |
| 150 | U | 7178 | 3.78 | 9379.1  | 51.0  | 7176 | 3.54 | 3459.2 | 24.3 | 5919.9  |
| 151 | U | 7163 | 3.89 | 4582.3  | 35.7  | 7161 | 3.16 | 1614.7 | 28.3 | 2967.7  |
| 152 | A | 7147 | 3.88 | 17401.5 | 47.6  | 7144 | 3.50 | 1558.3 | 27.6 | 15843.1 |
| 153 | G | 7133 | 3.89 | 9012.1  | 60.9  | 7131 | 3.59 | 2835.6 | 25.8 | 6176.5  |
| 154 | A | 7118 | 3.93 | 24449.7 | 38.0  | 7116 | 3.70 | 2014.6 | 22.2 | 22435.1 |
| 155 | C | 7101 | 3.89 | 10938.7 | 37.1  | 7099 | 3.78 | 4131.9 | 28.2 | 6806.8  |
| 156 | G | 7087 | 3.51 | 4538.8  | 61.7  | 7085 | 3.90 | 2470.6 | 19.8 | 2068.2  |
| 157 | U | 7073 | 3.43 | 4075.1  | 35.5  | 7070 | 3.59 | 2483.6 | 28.3 | 1591.5  |
| 158 | U | 7058 | 3.33 | 4503.1  | 40.8  | 7056 | 3.40 | 2457.8 | 17.9 | 2045.3  |
| 159 | U | 7043 | 3.08 | 403.3   | 41.9  | 7040 | 2.36 | 447.6  | 24.6 | -44.3   |
| 160 | C | 7027 | 3.58 | 8356.8  | 51.9  | 7025 | 3.82 | 3317.9 | 30.3 | 5038.9  |
| 161 | A | 7012 | 3.83 | 16578.1 | 91.6  | 7010 | 3.90 | 3615.8 | 21.7 | 12962.3 |
| 162 | G | 6998 | 4.03 | 587.1   | 69.2  | 6995 | 2.36 | 30.6   | 13.4 | 556.4   |
| 163 | C | 6983 | 3.08 | 1892.2  | 43.0  | 6980 | 3.16 | 1097.3 | 21.7 | 794.8   |
| 164 | U | 6968 | 3.23 | 3025.8  | 32.9  | 6967 | 3.15 | 1674.3 | 31.5 | 1351.5  |
| 165 | U | 6954 | 3.08 | 2295.9  | 37.6  | 6952 | 2.52 | 917.1  | 31.1 | 1378.9  |
| 166 | C | 6937 | 3.32 | 4423.6  | 49.9  | 6935 | 2.97 | 2035.3 | 24.8 | 2388.3  |
| 167 | C | 6921 | 3.19 | 5184.3  | 67.1  | 6919 | 2.83 | 1901.6 | 34.6 | 3282.7  |
| 168 | A | 6907 | 3.61 | 6909.4  | 139.5 | 6905 | 2.36 | 733.9  | 18.4 | 6175.4  |
| 169 | A | 6891 | 3.70 | 13500.1 | 100.1 | 6889 | 2.21 | 995.4  | 15.6 | 12504.7 |
| 170 | A | 6876 | 3.74 | 17721.5 | 96.4  | 6874 | 1.53 | 148.8  | 18.8 | 17572.7 |
| 171 | A | 6860 | 3.83 | 26261.3 | 152.0 | 6858 | 2.21 | 1226.4 | 20.7 | 25034.8 |
| 172 | C | 6844 | 3.83 | 29057.8 | 214.1 | 6842 | 2.10 | 991.0  | 20.0 | 28066.8 |
| 173 | A | 6828 | 3.73 | 9007.0  | 152.0 | 6825 | 2.05 | 990.8  | 26.1 | 8016.2  |
| 174 | G | 6814 | 3.04 | 4559.1  | 69.2  | 6812 | 1.53 | 308.1  | 15.2 | 4251.0  |
| 175 | A | 6798 | 3.23 | 5839.7  | 73.6  | 6796 | 1.53 | 332.7  | 29.3 | 5507.0  |
| 176 | A | 6783 | 3.29 | 9585.9  | 55.0  | 6781 | 2.72 | 2418.4 | 33.0 | 7167.5  |
| 177 | G | 6769 | 3.04 | 1417.6  | 50.4  | 6767 | 1.53 | 60.2   | 15.1 | 1357.3  |
| 178 | A | 6754 | 3.35 | 5559.2  | 53.1  | 6751 | 2.79 | 1342.2 | 22.8 | 4217.0  |
| 179 | A | 6738 | 3.40 | 6520.3  | 44.8  | 6736 | 3.14 | 2410.1 | 26.0 | 4110.2  |
| 180 | U | 6723 | 3.16 | 3834.7  | 35.4  | 6721 | 3.14 | 1880.7 | 21.1 | 1953.9  |
| 181 | G | 6710 | 3.04 | 272.1   | 30.9  | 6706 | 2.39 | 221.1  | 29.6 | 51.0    |
| 182 | U | 6694 | 3.29 | 6219.9  | 33.6  | 6692 | 3.83 | 3603.3 | 23.0 | 2616.6  |
| 183 | G | 6681 | 3.35 | 4163.6  | 29.6  | 6678 | 3.73 | 2080.2 | 26.5 | 2083.4  |
| 184 | A | 6665 | 3.50 | 5170.2  | 36.3  | 6663 | 3.56 | 2441.9 | 24.2 | 2728.4  |
| 185 | G | 6651 | 3.38 | 4955.2  | 29.6  | 6650 | 3.77 | 2306.4 | 28.0 | 2648.7  |

|     |   |      |      |         |       |      |      |        |      |         |
|-----|---|------|------|---------|-------|------|------|--------|------|---------|
| 186 | A | 6636 | 3.90 | 8675.8  | 110.4 | 6633 | 4.03 | 1221.2 | 24.5 | 7454.7  |
| 187 | A | 6620 | 3.80 | 23064.1 | 178.2 | 6618 | 3.83 | 3632.2 | 39.5 | 19431.9 |
| 188 | G | 6607 | 3.27 | 4484.0  | 57.6  | 6606 | 3.66 | 2173.8 | 25.9 | 2310.2  |
| 189 | G | 6594 | 3.55 | 1282.2  | 40.6  | 6593 | 3.88 | 418.6  | 18.3 | 863.6   |
| 190 | C | 6579 | 3.55 | 3436.4  | 43.3  | 6577 | 3.56 | 1035.1 | 15.7 | 2401.3  |
| 191 | U | 6565 | 3.04 | 4236.2  | 53.5  | 6564 | 3.73 | 2505.9 | 17.9 | 1730.3  |
| 192 | U | 6550 | 2.75 | 0.0     | 57.5  | 6549 | 2.56 | 41.3   | 14.2 | -41.3   |
| 193 | C | 6539 | 3.56 | 2438.5  | 170.2 | 6534 | 3.51 | 1638.3 | 17.1 | 800.2   |
| 194 | C | 6521 | 3.85 | 11291.7 | 122.5 | 6519 | 3.83 | 3321.7 | 26.0 | 7970.0  |
| 195 | A | 6505 | 3.75 | 14900.2 | 86.4  | 6503 | 3.72 | 3011.5 | 31.3 | 11888.7 |
| 196 | C | 6490 | 3.60 | 8045.5  | 43.6  | 6488 | 3.68 | 2755.9 | 28.8 | 5289.6  |
| 197 | U | 6475 | 3.60 | 5458.7  | 34.8  | 6473 | 3.72 | 2708.5 | 27.1 | 2750.2  |
| 198 | A | 6460 | 3.42 | 4996.6  | 42.2  | 6457 | 3.38 | 1136.3 | 21.6 | 3860.3  |
| 199 | A | 6445 | 3.70 | 10234.0 | 95.7  | 6443 | 3.75 | 3945.3 | 39.4 | 6288.7  |
| 200 | G | 6431 | 3.75 | 4632.9  | 62.2  | 6430 | 3.96 | 2410.2 | 27.5 | 2222.7  |
| 201 | G | 6418 | 3.27 | 3788.8  | 37.8  | 6416 | 3.47 | 1634.8 | 33.4 | 2153.9  |
| 202 | C | 6404 | 3.56 | 227.7   | 47.5  | 6402 | 3.71 | 252.7  | 35.4 | -25.0   |
| 203 | U | 6390 | 3.45 | 6209.8  | 49.6  | 6388 | 3.42 | 2930.0 | 45.2 | 3279.8  |
| 204 | A | 6377 | 3.60 | 7819.8  | 73.1  | 6374 | 3.15 | 1078.7 | 31.7 | 6741.1  |
| 205 | A | 6362 | 3.60 | 20405.5 | 60.3  | 6360 | 3.18 | 2095.5 | 25.3 | 18310.0 |
| 206 | C | 6347 | 3.51 | 8733.0  | 64.5  | 6345 | 3.01 | 1625.4 | 21.7 | 7107.6  |
| 207 | U | 6333 | 2.75 | 926.7   | 53.3  | 6331 | 2.56 | 164.2  | 19.7 | 762.4   |
| 208 | C | 6317 | 3.30 | 8635.7  | 65.9  | 6315 | 3.11 | 3033.7 | 40.0 | 5602.0  |
| 209 | U | 6303 | 2.75 | 1223.4  | 75.5  | 6302 | 2.56 | 282.4  | 19.0 | 941.0   |
| 210 | C | 6289 | 3.20 | 7862.3  | 100.6 | 6287 | 2.80 | 1716.6 | 26.1 | 6145.7  |
| 211 | A | 6274 | 3.45 | 13365.9 | 109.9 | 6272 | 2.56 | 1154.7 | 30.4 | 12211.2 |
| 212 | A | 6259 | 3.30 | 10914.8 | 123.4 | 6257 | 2.56 | 1402.3 | 25.1 | 9512.6  |
| 213 | C | 6244 | 3.15 | 6619.9  | 102.0 | 6242 | 2.71 | 1356.9 | 34.3 | 5263.0  |
| 214 | A | 6229 | 3.06 | 10984.9 | 127.9 | 6227 | 3.06 | 2211.5 | 24.1 | 8773.3  |
| 215 | G | 6217 | 3.19 | 6029.6  | 128.1 | 6215 | 2.84 | 1756.6 | 30.6 | 4273.0  |
| 216 | A | 6202 | 3.43 | 9768.1  | 112.2 | 6201 | 2.16 | 250.3  | 21.5 | 9517.8  |
| 217 | C | 6187 | 3.36 | 15924.3 | 141.3 | 6185 | 3.08 | 1674.5 | 30.3 | 14249.8 |
| 218 | A | 6173 | 3.57 | 24675.2 | 195.3 | 6171 | 3.26 | 3610.9 | 35.8 | 21064.3 |
| 219 | A | 6158 | 3.62 | 12013.8 | 121.3 | 6156 | 2.16 | 263.3  | 26.5 | 11750.5 |
| 220 | C | 6143 | 3.50 | 26378.8 | 80.0  | 6141 | 3.11 | 2862.6 | 26.4 | 23516.2 |
| 221 | A | 6129 | 3.43 | 13777.7 | 52.0  | 6127 | 2.84 | 1888.1 | 26.9 | 11889.6 |
| 222 | A | 6115 | 3.08 | 4517.7  | 78.6  | 6113 | 2.16 | 0.0    | 16.8 | 4517.7  |
| 223 | C | 6100 | 3.23 | 12440.5 | 88.3  | 6098 | 2.16 | 612.2  | 11.9 | 11828.4 |
| 224 | A | 6085 | 3.23 | 15299.0 | 99.3  | 6083 | 2.16 | 1052.0 | 14.4 | 14247.0 |
| 225 | C | 6069 | 3.08 | 7442.3  | 97.6  | 6067 | 2.16 | 235.6  | 19.6 | 7206.7  |
| 226 | C | 6053 | 3.28 | 8279.5  | 85.6  | 6051 | 3.04 | 2225.8 | 28.7 | 6053.7  |
| 227 | U | 6040 | 3.43 | 7603.7  | 58.3  | 6038 | 3.36 | 3244.3 | 22.5 | 4359.4  |
| 228 | G | 6028 | 3.08 | 198.0   | 114.0 | 6026 | 2.16 | 0.0    | 42.5 | 198.0   |
| 229 | C | 6016 | 3.29 | 13102.2 | 135.1 | 6014 | 2.90 | 1372.2 | 42.8 | 11730.0 |
| 230 | U | 6002 | 3.43 | 10370.4 | 103.8 | 6000 | 3.16 | 3330.6 | 40.7 | 7039.8  |
| 231 | U | 5989 | 3.08 | 4208.8  | 90.4  | 5987 | 2.37 | 1123.7 | 30.1 | 3085.2  |
| 232 | C | 5974 | 3.28 | 14127.6 | 123.1 | 5972 | 2.66 | 1717.3 | 34.1 | 12410.3 |
| 233 | A | 5959 | 3.38 | 15651.0 | 126.9 | 5956 | 2.76 | 2313.1 | 42.0 | 13337.9 |

|     |   |      |      |         |       |      |      |        |       |         |
|-----|---|------|------|---------|-------|------|------|--------|-------|---------|
| 234 | U | 5944 | 3.08 | 4150.8  | 98.3  | 5942 | 2.16 | 737.1  | 20.5  | 3413.7  |
| 235 | C | 5928 | 3.08 | 10290.3 | 89.0  | 5926 | 2.40 | 1216.9 | 18.7  | 9073.4  |
| 236 | A | 5912 | 3.08 | 9251.1  | 99.9  | 5910 | 2.80 | 1919.9 | 41.2  | 7331.2  |
| 237 | G | 5899 | 3.14 | 8750.4  | 90.1  | 5896 | 3.12 | 3071.0 | 35.5  | 5679.4  |
| 238 | C | 5886 | 3.23 | 8456.5  | 75.4  | 5884 | 2.87 | 2201.7 | 29.5  | 6254.9  |
| 239 | U | 5873 | 2.40 | 1445.0  | 76.5  | 5869 | 2.63 | 938.2  | 22.7  | 506.8   |
| 240 | G | 5862 | 2.57 | 1213.0  | 56.4  | 5860 | 2.49 | 856.0  | 15.3  | 357.0   |
| 241 | U | 5849 | 2.33 | 2332.4  | 29.3  | 5847 | 2.46 | 1069.0 | 17.0  | 1263.4  |
| 242 | U | 5834 | 2.33 | 982.5   | 72.0  | 5833 | 1.12 | 258.7  | 23.7  | 723.7   |
| 243 | C | 5820 | 3.09 | 10640.8 | 87.7  | 5818 | 2.68 | 1486.1 | 26.7  | 9154.7  |
| 244 | C | 5805 | 3.18 | 15816.5 | 121.5 | 5803 | 3.05 | 2310.5 | 34.6  | 13506.1 |
| 245 | A | 5791 | 3.33 | 16388.1 | 161.3 | 5788 | 3.46 | 3230.4 | 24.5  | 13157.8 |
| 246 | G | 5779 | 3.43 | 9054.8  | 153.0 | 5777 | 3.30 | 3655.8 | 38.1  | 5399.0  |
| 247 | A | 5766 | 2.70 | 3956.8  | 68.6  | 5764 | 3.06 | 1816.2 | 28.8  | 2140.6  |
| 248 | G | 5755 | 3.38 | 2092.4  | 77.4  | 5753 | 3.32 | 1131.1 | 20.1  | 961.3   |
| 249 | A | 5742 | 3.19 | 19099.8 | 165.7 | 5740 | 2.64 | 1139.7 | 26.8  | 17960.1 |
| 250 | A | 5728 | 2.42 | 3499.7  | 129.5 | 5726 | 1.12 | 82.8   | 13.0  | 3416.8  |
| 251 | C | 5714 | 2.89 | 7728.1  | 138.0 | 5711 | 1.12 | 113.6  | 8.7   | 7614.5  |
| 252 | C | 5699 | 3.10 | 10306.6 | 111.7 | 5697 | 1.38 | 284.0  | 16.4  | 10022.6 |
| 253 | C | 5684 | 3.29 | 17310.6 | 104.0 | 5682 | 2.16 | 755.2  | 21.8  | 16555.4 |
| 254 | C | 5669 | 2.99 | 4751.9  | 122.0 | 5667 | 1.72 | 557.1  | 22.5  | 4194.8  |
| 255 | C | 5655 | 2.75 | 4063.7  | 83.3  | 5652 | 2.42 | 987.2  | 27.7  | 3076.5  |
| 256 | A | 5640 | 2.94 | 6120.9  | 68.9  | 5638 | 2.72 | 1944.7 | 29.5  | 4176.2  |
| 257 | U | 5627 | 2.33 | 1308.3  | 39.9  | 5625 | 1.32 | 186.9  | 20.0  | 1121.5  |
| 258 | C | 5613 | 2.69 | 3483.2  | 46.8  | 5611 | 2.16 | 1233.6 | 14.0  | 2249.7  |
| 259 | A | 5599 | 2.71 | 1844.7  | 50.6  | 5598 | 3.12 | 58.9   | 32.6  | 1785.8  |
| 260 | U | 5587 | 3.14 | 5258.1  | 54.9  | 5585 | 3.06 | 2386.4 | 21.5  | 2871.7  |
| 261 | G | 5574 | 2.65 | 275.9   | 61.7  | 5572 | 2.17 | 40.0   | 16.5  | 236.0   |
| 262 | C | 5561 | 3.50 | 6374.7  | 87.1  | 5559 | 2.94 | 1419.7 | 28.9  | 4955.0  |
| 263 | C | 5547 | 3.36 | 13370.1 | 165.4 | 5545 | 3.17 | 2305.4 | 31.6  | 11064.7 |
| 264 | U | 5534 | 2.65 | 108.6   | 87.7  | 5532 | 2.25 | 133.0  | 28.0  | -24.5   |
| 265 | C | 5520 | 3.04 | 5730.0  | 73.0  | 5518 | 3.12 | 2559.7 | 36.2  | 3170.3  |
| 266 | U | 5508 | 2.65 | 1773.3  | 46.8  | 5506 | 2.17 | 484.0  | 19.0  | 1289.2  |
| 267 | C | 5493 | 2.80 | 3405.4  | 59.3  | 5491 | 2.57 | 1190.8 | 18.1  | 2214.6  |
| 268 | C | 5479 | 3.12 | 8328.2  | 85.8  | 5477 | 2.87 | 2853.9 | 37.5  | 5474.3  |
| 269 | U | 5465 | 2.65 | 1696.7  | 72.0  | 5463 | 2.17 | 0.2    | 14.0  | 1696.5  |
| 270 | C | 5452 | 2.65 | 2281.1  | 81.4  | 5449 | 2.17 | 43.2   | 8.9   | 2237.9  |
| 271 | A | 5439 | 3.44 | 18694.8 | 63.7  | 5437 | 2.33 | 1091.1 | 19.6  | 17603.7 |
| 272 | A | 5425 | 3.44 | 23989.8 | 59.6  | 5423 | 2.41 | 1273.1 | 19.4  | 22716.6 |
| 273 | C | 5411 | 3.30 | 9548.9  | 66.3  | 5408 | 2.17 | 38.8   | 10.5  | 9510.1  |
| 274 | C | 5397 | 3.16 | 4349.8  | 45.9  | 5394 | 2.70 | 970.5  | 30.6  | 3379.3  |
| 275 | U | 5384 | 3.20 | 8608.4  | 42.2  | 5382 | 3.03 | 3728.0 | 36.5  | 4880.3  |
| 276 | G | 5372 | 2.65 | 2256.4  | 60.2  | 5370 | 2.18 | 690.3  | 40.8  | 1566.0  |
| 277 | C | 5358 | 2.65 | 2875.6  | 37.9  | 5356 | 2.53 | 1322.6 | 28.1  | 1553.0  |
| 278 | U | 5344 | 2.65 | 1829.4  | 70.6  | 5342 | 2.17 | 809.0  | 26.0  | 1020.5  |
| 279 | U | 5331 | 3.65 | 9182.4  | 147.3 | 5329 | 4.78 | 2471.2 | 75.4  | 6711.2  |
| 280 | C | 5317 | 3.50 | 49955.4 | 318.0 | 5315 | 4.32 | 3918.5 | 103.4 | 46036.9 |
| 281 | A | 5304 | 3.29 | 13582.4 | 136.2 | 5301 | 2.67 | 1447.3 | 26.9  | 12135.1 |

|     |   |      |      |         |       |      |      |        |      |         |
|-----|---|------|------|---------|-------|------|------|--------|------|---------|
| 282 | G | 5293 | 3.40 | 2854.1  | 79.4  | 5291 | 2.79 | 858.6  | 15.5 | 1995.5  |
| 283 | U | 5282 | 2.72 | 2991.2  | 50.5  | 5280 | 2.88 | 1459.6 | 21.1 | 1531.6  |
| 284 | A | 5269 | 2.42 | 2000.4  | 51.4  | 5266 | 2.64 | 981.9  | 18.3 | 1018.5  |
| 285 | C | 5255 | 2.26 | 1552.0  | 68.8  | 5252 | 3.04 | 780.3  | 30.0 | 771.7   |
| 286 | C | 5241 | 3.40 | 17564.7 | 47.5  | 5239 | 3.48 | 3187.2 | 27.6 | 14377.5 |
| 287 | A | 5228 | 3.40 | 21285.9 | 54.5  | 5226 | 2.20 | 321.6  | 23.3 | 20964.3 |
| 288 | C | 5214 | 2.21 | 964.4   | 46.0  | 5210 | 2.20 | 197.0  | 14.6 | 767.4   |
| 289 | C | 5199 | 3.05 | 6567.3  | 49.1  | 5197 | 3.13 | 2166.2 | 17.8 | 4401.1  |
| 290 | U | 5186 | 2.55 | 1718.4  | 55.8  | 5184 | 3.18 | 873.3  | 17.5 | 845.1   |
| 291 | C | 5174 | 3.10 | 7977.9  | 120.2 | 5171 | 3.32 | 1865.0 | 20.6 | 6112.9  |
| 292 | C | 5160 | 3.24 | 12292.3 | 131.2 | 5157 | 3.42 | 2710.2 | 24.3 | 9582.1  |
| 293 | A | 5146 | 3.40 | 17277.1 | 146.7 | 5143 | 3.68 | 2671.8 | 33.2 | 14605.3 |
| 294 | C | 5131 | 3.45 | 22602.6 | 138.6 | 5128 | 3.65 | 3605.0 | 42.9 | 18997.5 |
| 295 | A | 5117 | 3.43 | 28724.1 | 123.9 | 5115 | 3.65 | 5247.1 | 51.4 | 23477.1 |
| 296 | G | 5104 | 3.60 | 6595.8  | 75.8  | 5102 | 3.68 | 2631.8 | 35.9 | 3964.0  |
| 297 | A | 5089 | 3.29 | 21883.3 | 216.0 | 5087 | 3.83 | 2450.3 | 29.2 | 19433.0 |
| 298 | A | 5075 | 3.37 | 24633.7 | 236.9 | 5072 | 3.70 | 3793.9 | 37.1 | 20839.8 |
| 299 | U | 5063 | 3.45 | 5811.4  | 93.5  | 5060 | 3.01 | 2735.4 | 34.5 | 3076.1  |
| 300 | G | 5052 | 3.03 | 2464.4  | 30.3  | 5052 | 2.90 | 900.7  | 34.8 | 1563.7  |
| 301 | G | 5041 | 2.71 | 2396.5  | 45.6  | 5044 | 4.75 | 398.1  | 55.4 | 1998.4  |
| 302 | G | 5030 | 3.64 | 12250.2 | 99.3  | 5028 | 4.10 | 4179.6 | 51.2 | 8070.6  |
| 303 | C | 5016 | 3.60 | 29113.3 | 129.4 | 5014 | 3.72 | 4135.5 | 37.3 | 24977.8 |
| 304 | C | 5005 | 2.89 | 2165.0  | 72.3  | 5001 | 2.95 | 780.0  | 14.6 | 1385.0  |
| 305 | G | 4993 | 3.50 | 690.7   | 45.6  | 4990 | 3.20 | 1.6    | 17.0 | 689.1   |
| 306 | U | 4981 | 2.21 | 726.5   | 27.9  | 4978 | 2.20 | 385.3  | 23.2 | 341.2   |
| 307 | A | 4966 | 2.82 | 5939.7  | 80.8  | 4963 | 2.95 | 2156.6 | 28.9 | 3783.2  |
| 308 | C | 4951 | 2.46 | 2360.5  | 87.8  | 4948 | 2.77 | 1172.7 | 19.9 | 1187.8  |
| 309 | C | 4938 | 3.09 | 2211.6  | 92.7  | 4934 | 2.79 | 1230.9 | 21.1 | 980.6   |
| 310 | C | 4926 | 3.21 | 14046.6 | 133.2 | 4924 | 3.53 | 2599.6 | 37.6 | 11447.0 |
| 311 | A | 4912 | 3.42 | 25955.7 | 165.1 | 4909 | 3.75 | 2530.9 | 32.8 | 23424.8 |
| 312 | C | 4898 | 3.42 | 26760.0 | 127.8 | 4896 | 3.39 | 3803.3 | 30.5 | 22956.6 |
| 313 | A | 4885 | 3.16 | 6274.1  | 92.2  | 4883 | 3.13 | 1494.1 | 17.1 | 4780.0  |
| 314 | G | 4874 | 2.41 | 784.8   | 85.3  | 4871 | 2.20 | 4.2    | 16.0 | 780.6   |
| 315 | C | 4862 | 2.81 | 4984.3  | 66.2  | 4859 | 2.76 | 2153.7 | 32.2 | 2830.6  |
| 316 | A | 4848 | 3.02 | 5967.1  | 55.5  | 4845 | 3.01 | 2122.2 | 40.5 | 3844.9  |
| 317 | G | 4837 | 3.07 | 6893.5  | 72.3  | 4834 | 3.05 | 2732.7 | 46.2 | 4160.9  |
| 318 | U | 4825 | 3.02 | 10216.8 | 83.7  | 4823 | 3.10 | 4016.2 | 41.4 | 6200.6  |
| 319 | G | 4814 | 2.23 | 1349.0  | 73.3  | 4812 | 3.15 | 406.8  | 20.3 | 942.2   |
| 320 | C | 4800 | 2.82 | 5120.7  | 82.0  | 4797 | 2.96 | 2495.5 | 24.2 | 2625.2  |
| 321 | A | 4787 | 3.02 | 6130.9  | 81.4  | 4784 | 3.20 | 2529.7 | 34.6 | 3601.1  |
| 322 | U | 4774 | 3.07 | 4536.9  | 61.8  | 4771 | 3.10 | 2318.7 | 50.3 | 2218.2  |
| 323 | G | 4764 | 2.90 | 6601.0  | 80.0  | 4762 | 2.92 | 2355.7 | 29.3 | 4245.3  |
| 324 | A | 4752 | 2.41 | 2073.6  | 41.0  | 4749 | 2.75 | 807.5  | 29.4 | 1266.2  |
| 325 | U | 4741 | 2.15 | 195.1   | 17.0  | 4739 | 2.20 | 364.7  | 12.7 | -169.7  |
| 326 | G | 4731 | 2.15 | 43.8    | 86.0  | 4728 | 3.02 | 231.6  | 21.7 | -187.8  |
| 327 | A | 4718 | 3.10 | 20036.8 | 174.5 | 4716 | 3.40 | 2251.8 | 28.3 | 17785.0 |
| 328 | C | 4704 | 3.15 | 21835.0 | 237.5 | 4702 | 3.40 | 2375.1 | 35.1 | 19459.8 |
| 329 | C | 4690 | 3.20 | 22019.7 | 265.2 | 4688 | 3.43 | 4002.2 | 45.7 | 18017.5 |

|     |   |      |      |         |       |      |      |        |      |         |
|-----|---|------|------|---------|-------|------|------|--------|------|---------|
| 330 | C | 4677 | 3.05 | 20505.8 | 327.2 | 4675 | 3.38 | 4342.5 | 46.9 | 16163.3 |
| 331 | A | 4666 | 2.80 | 11227.5 | 201.8 | 4663 | 3.24 | 1326.2 | 30.5 | 9901.3  |
| 332 | A | 4654 | 3.20 | 20076.4 | 225.0 | 4650 | 3.28 | 1971.3 | 26.7 | 18105.1 |
| 333 | A | 4641 | 3.25 | 24477.2 | 126.8 | 4638 | 3.00 | 2242.2 | 36.2 | 22235.0 |
| 334 | A | 4628 | 3.05 | 16738.2 | 173.7 | 4625 | 2.31 | 1131.1 | 26.5 | 15607.1 |
| 335 | C | 4615 | 2.90 | 8527.2  | 165.3 | 4612 | 2.81 | 1065.3 | 45.8 | 7462.0  |
| 336 | C | 4602 | 3.05 | 18160.0 | 189.3 | 4600 | 3.05 | 2919.9 | 26.0 | 15240.1 |
| 337 | A | 4590 | 3.05 | 18096.8 | 189.3 | 4587 | 3.05 | 1949.5 | 26.8 | 16147.3 |
| 338 | A | 4577 | 3.05 | 18696.9 | 170.8 | 4574 | 2.86 | 1915.5 | 45.9 | 16781.4 |
| 339 | G | 4566 | 2.13 | 2364.0  | 103.2 | 4563 | 2.05 | 534.6  | 20.9 | 1829.4  |
| 340 | C | 4554 | 2.80 | 8534.5  | 140.3 | 4551 | 2.45 | 1526.5 | 22.3 | 7008.0  |
| 341 | C | 4541 | 2.62 | 5407.0  | 126.9 | 4538 | 2.36 | 1437.0 | 22.8 | 3970.0  |
| 342 | A | 4529 | 2.86 | 11498.9 | 125.9 | 4526 | 2.05 | 375.3  | 22.0 | 11123.6 |
| 343 | A | 4515 | 2.80 | 11367.7 | 192.3 | 4513 | 2.05 | 1308.5 | 29.0 | 10059.2 |
| 344 | U | 4504 | 2.54 | 6202.6  | 67.9  | 4501 | 2.05 | 789.3  | 26.6 | 5413.3  |
| 345 | C | 4492 | 2.05 | 2024.9  | 92.8  | 4489 | 2.05 | 471.2  | 22.6 | 1553.7  |
| 346 | C | 4479 | 3.00 | 16918.3 | 210.8 | 4476 | 2.75 | 2240.7 | 35.9 | 14677.6 |
| 347 | A | 4466 | 2.95 | 15513.1 | 133.7 | 4463 | 2.60 | 2143.2 | 33.3 | 13369.9 |
| 348 | U | 4453 | 2.05 | 1972.7  | 174.8 | 4449 | 3.15 | 501.8  | 44.6 | 1470.9  |
| 349 | C | 4439 | 3.05 | 23266.5 | 260.5 | 4436 | 3.05 | 4145.7 | 53.7 | 19120.8 |
| 350 | U | 4427 | 2.82 | 9418.4  | 118.6 | 4424 | 2.90 | 3947.6 | 47.6 | 5470.9  |
| 351 | G | 4416 | 2.55 | 2615.5  | 91.5  | 4414 | 2.85 | 1125.5 | 32.7 | 1490.0  |
| 352 | G | 4406 | 2.05 | 1056.9  | 59.5  | 4402 | 2.05 | 483.3  | 29.9 | 573.5   |
| 353 | U | 4394 | 2.45 | 5100.7  | 48.9  | 4391 | 2.80 | 2500.7 | 31.8 | 2600.0  |
| 354 | U | 4382 | 2.46 | 3896.7  | 52.6  | 4379 | 2.84 | 2069.7 | 31.3 | 1827.1  |
| 355 | G | 4372 | 2.87 | 4052.8  | 131.3 | 4369 | 3.15 | 2164.3 | 44.8 | 1888.5  |
| 356 | G | 4362 | 3.05 | 17188.8 | 119.7 | 4359 | 3.20 | 5483.4 | 33.3 | 11705.4 |
| 357 | U | 4351 | 2.90 | 7285.9  | 180.6 | 4348 | 3.30 | 3023.7 | 53.1 | 4262.1  |
| 358 | C | 4338 | 3.09 | 19393.6 | 242.1 | 4334 | 3.45 | 4525.3 | 47.3 | 14868.3 |
| 359 | A | 4326 | 3.20 | 23832.5 | 180.4 | 4322 | 3.07 | 4619.7 | 88.9 | 19212.8 |
| 360 | U | 4315 | 3.05 | 13856.8 | 116.1 | 4312 | 3.00 | 5661.1 | 71.0 | 8195.7  |
| 361 | U | 4303 | 2.23 | 2055.4  | 111.0 | 4300 | 3.07 | 1485.6 | 42.9 | 569.8   |
| 362 | U | 4292 | 2.05 | 2276.8  | 40.1  | 4289 | 2.45 | 1363.3 | 22.5 | 913.4   |
| 363 | U | 4280 | 2.05 | 1213.7  | 53.9  | 4277 | 2.45 | 477.6  | 20.7 | 736.1   |
| 364 | A | 4268 | 2.48 | 5807.5  | 112.0 | 4265 | 2.45 | 1839.3 | 44.3 | 3968.2  |
| 365 | C | 4257 | 3.05 | 2366.9  | 296.1 | 4253 | 3.03 | 639.1  | 46.5 | 1727.8  |
| 366 | G | 4247 | 3.62 | 5184.5  | 94.5  | 4249 | 2.45 | 295.1  | 52.4 | 4889.4  |
| 367 | G | 4237 | 2.51 | 3023.7  | 115.7 | 4243 | 4.50 | 2251.3 | 88.8 | 772.4   |
| 368 | A | 4226 | 2.05 | 1472.1  | 109.9 | 4227 | 2.45 | 0.0    | 84.9 | 1472.1  |
| 369 | C | 4214 | 3.00 | 13167.6 | 124.6 | 4211 | 2.65 | 1430.1 | 23.6 | 11737.5 |
| 370 | A | 4201 | 3.09 | 13086.1 | 157.4 | 4198 | 2.73 | 1150.5 | 26.4 | 11935.7 |
| 371 | C | 4187 | 3.05 | 20972.4 | 178.2 | 4184 | 2.80 | 1657.6 | 24.2 | 19314.8 |
| 372 | C | 4175 | 2.05 | 1258.8  | 133.7 | 4171 | 2.45 | 411.6  | 24.0 | 847.2   |
| 373 | C | 4162 | 3.00 | 13213.9 | 175.9 | 4158 | 2.80 | 2102.0 | 38.3 | 11111.9 |
| 374 | A | 4151 | 3.00 | 22803.5 | 198.0 | 4149 | 2.88 | 3212.0 | 47.1 | 19591.5 |
| 375 | U | 4140 | 2.99 | 8423.4  | 178.1 | 4138 | 3.10 | 1935.1 | 30.7 | 6488.3  |
| 376 | C | 4127 | 3.15 | 17305.1 | 157.7 | 4124 | 2.95 | 2517.2 | 37.5 | 14787.9 |
| 377 | U | 4115 | 2.90 | 9553.3  | 275.2 | 4113 | 3.15 | 3249.0 | 54.2 | 6304.3  |

|     |   |      |      |         |       |      |      |        |      |         |
|-----|---|------|------|---------|-------|------|------|--------|------|---------|
| 378 | A | 4104 | 2.99 | 23764.7 | 344.7 | 4101 | 3.30 | 3610.7 | 39.7 | 20154.0 |
| 379 | U | 4093 | 3.35 | 12011.4 | 151.0 | 4090 | 3.35 | 4463.5 | 40.2 | 7548.0  |
| 380 | G | 4083 | 3.03 | 4892.2  | 204.2 | 4080 | 2.89 | 1440.0 | 82.1 | 3452.2  |
| 381 | A | 4072 | 2.65 | 7144.7  | 91.5  | 4069 | 2.04 | 1043.8 | 28.8 | 6100.9  |
| 382 | U | 4059 | 2.13 | 2406.1  | 96.6  | 4056 | 1.95 | 714.7  | 19.7 | 1691.3  |
| 383 | U | 4049 | 1.80 | 1442.1  | 51.3  | 4046 | 1.95 | 441.3  | 15.9 | 1000.8  |
| 384 | C | 4037 | 2.60 | 3775.4  | 181.4 | 4033 | 2.15 | 981.4  | 12.2 | 2794.0  |
| 385 | C | 4027 | 4.49 | 298.9   | 267.9 | 4027 | 3.99 | 1.6    | 63.9 | 297.3   |
| 386 | G | 4017 | 4.30 | 9075.2  | 221.9 | 4016 | 4.04 | 2855.5 | 45.5 | 6219.7  |
| 387 | U | 4006 | 1.80 | 570.7   | 126.3 | 4004 | 1.95 | 116.0  | 52.9 | 454.7   |
| 388 | A | 3995 | 2.60 | 6466.0  | 85.1  | 3992 | 2.97 | 2525.5 | 36.3 | 3940.5  |
| 389 | U | 3986 | 2.47 | 2319.2  | 125.5 | 3983 | 2.95 | 2041.5 | 33.7 | 277.7   |
| 390 | A | 3975 | 1.93 | 4170.3  | 219.5 | 3971 | 2.85 | 184.4  | 43.5 | 3985.9  |
| 391 | C | 3962 | 3.00 | 23136.4 | 241.5 | 3959 | 2.90 | 2231.3 | 32.1 | 20905.1 |
| 392 | A | 3951 | 3.03 | 23477.6 | 251.2 | 3949 | 2.95 | 2526.4 | 33.1 | 20951.2 |
| 393 | C | 3938 | 2.99 | 13006.1 | 338.2 | 3935 | 3.15 | 1778.1 | 23.1 | 11228.0 |
| 394 | C | 3926 | 2.75 | 11013.3 | 252.1 | 3922 | 3.00 | 2737.6 | 51.4 | 8275.8  |
| 395 | U | 3916 | 2.95 | 2804.4  | 180.6 | 3913 | 3.14 | 1722.6 | 57.5 | 1081.8  |
| 396 | U | 3906 | 2.46 | 6065.1  | 109.6 | 3902 | 3.10 | 3050.9 | 42.3 | 3014.2  |
| 397 | A | 3894 | 3.00 | 20117.9 | 253.0 | 3891 | 3.09 | 3523.1 | 44.7 | 16594.7 |
| 398 | U | 3883 | 3.18 | 6264.3  | 116.9 | 3879 | 3.29 | 2592.6 | 18.8 | 3671.6  |
| 399 | C | 3870 | 3.05 | 19192.0 | 176.3 | 3867 | 3.11 | 3976.7 | 28.4 | 15215.3 |
| 400 | A | 3859 | 3.00 | 17033.8 | 232.2 | 3855 | 2.86 | 2307.8 | 46.6 | 14726.0 |
| 401 | A | 3848 | 3.05 | 26841.2 | 218.5 | 3845 | 2.96 | 4070.0 | 57.6 | 22771.2 |
| 402 | A | 3837 | 3.13 | 15869.0 | 161.6 | 3833 | 3.29 | 1572.6 | 24.1 | 14296.4 |
| 403 | U | 3826 | 3.28 | 5044.3  | 133.9 | 3822 | 3.49 | 1645.2 | 35.8 | 3399.1  |
| 404 | G | 3816 | 3.28 | 2090.1  | 117.1 | 3812 | 2.92 | 609.0  | 73.2 | 1481.1  |
| 405 | U | 3805 | 2.43 | 682.1   | 153.2 | 3801 | 2.55 | 2084.8 | 45.2 | -1402.7 |
| 406 | C | 3795 | 3.47 | 42353.7 | 303.1 | 3791 | 3.11 | 2067.5 | 52.7 | 40286.2 |
| 407 | G | 3784 | 3.81 | 3887.6  | 204.0 | 3781 | 3.16 | 695.7  | 58.2 | 3191.9  |
| 408 | C | 3773 | 2.43 | 2243.7  | 73.7  | 3770 | 1.54 | 348.9  | 15.1 | 1894.8  |
| 409 | C | 3760 | 2.63 | 2880.0  | 38.6  | 3756 | 1.60 | 490.6  | 14.9 | 2389.4  |
| 410 | U | 3750 | 2.43 | 4275.6  | 98.8  | 3746 | 2.54 | 906.4  | 36.9 | 3369.2  |
| 411 | A | 3740 | 3.45 | 9641.6  | 350.1 | 3735 | 2.49 | 2161.1 | 21.5 | 7480.5  |
| 412 | U | 3731 | 4.23 | 1634.5  | 154.4 | 3731 | 2.96 | 553.8  | 52.2 | 1080.7  |
| 413 | G | 3722 | 3.58 | 3217.7  | 37.0  | 3718 | 3.98 | 764.4  | 36.0 | 2453.3  |
| 414 | U | 3711 | 2.98 | 3838.8  | 100.8 | 3707 | 2.62 | 811.4  | 28.1 | 3027.4  |
| 415 | A | 3701 | 3.47 | 18351.9 | 118.4 | 3697 | 2.94 | 1589.9 | 27.2 | 16762.0 |
| 416 | C | 3689 | 3.53 | 8365.0  | 145.5 | 3685 | 2.92 | 1669.1 | 23.6 | 6695.9  |
| 417 | U | 3679 | 3.08 | 5119.3  | 103.0 | 3675 | 2.96 | 1808.8 | 27.8 | 3310.5  |
| 418 | U | 3669 | 3.23 | 13945.5 | 126.5 | 3665 | 2.96 | 2245.3 | 28.4 | 11700.2 |
| 419 | U | 3659 | 2.43 | 2374.6  | 80.9  | 3655 | 2.87 | 1079.7 | 19.1 | 1294.9  |
| 420 | C | 3648 | 2.43 | 0.7     | 85.2  | 3646 | 2.92 | 767.7  | 17.2 | -767.0  |
| 421 | C | 3638 | 3.05 | 14517.8 | 144.4 | 3634 | 3.04 | 1943.5 | 19.4 | 12574.4 |
| 422 | A | 3627 | 3.13 | 2996.5  | 74.4  | 3622 | 2.94 | 611.4  | 22.5 | 2385.1  |
| 423 | C | 3613 | 2.50 | 1631.3  | 78.3  | 3609 | 2.48 | 430.3  | 21.0 | 1201.0  |

### DMS\_example\_3\_peaks.txt

| seqnum | seq | RX.pos | RX.sigma | RX.area | RX.rms | BG.pos | BG.sigma | BG.area | BG.rms | (RX.area-BG.area) |
|--------|-----|--------|----------|---------|--------|--------|----------|---------|--------|-------------------|
| 7      | A   | 9360   | 5.51     | 28794.4 | 392.9  | 9357   | 2.80     | 0.0     | 0.0    | 28794.4           |
| 8      | A   | 9345   | 5.51     | 30913.3 | 389.0  | 9340   | 4.35     | 116.6   | 84.1   | 30796.7           |
| 9      | C   | 9327   | 5.98     | 33737.4 | 435.6  | 9322   | 3.65     | 3075.8  | 103.6  | 30661.6           |
| 10     | U   | 9310   | 4.80     | 7338.0  | 165.2  | 9310   | 5.39     | 4652.8  | 119.1  | 2685.2            |
| 11     | U   | 9293   | 4.80     | 185.9   | 173.1  | 9291   | 2.85     | 0.0     | 106.0  | 185.9             |
| 12     | C   | 9276   | 5.20     | 22721.2 | 152.0  | 9272   | 4.27     | 3845.1  | 89.4   | 18876.1           |
| 13     | U   | 9259   | 4.87     | 14088.1 | 179.6  | 9257   | 5.29     | 4989.0  | 103.8  | 9099.1            |
| 14     | A   | 9243   | 5.03     | 27061.7 | 200.2  | 9239   | 5.25     | 2636.8  | 87.4   | 24424.8           |
| 15     | G   | 9228   | 4.80     | 1686.9  | 147.4  | 9221   | 5.00     | 854.2   | 78.9   | 832.7             |
| 16     | U   | 9212   | 4.80     | 4147.6  | 85.1   | 9206   | 6.35     | 3041.6  | 201.8  | 1105.9            |
| 17     | A   | 9196   | 5.10     | 7150.0  | 108.5  | 9191   | 5.55     | 23614.8 | 230.5  | -16464.8          |
| 18     | U   | 9178   | 5.15     | 654.5   | 99.5   | 9174   | 2.85     | 439.8   | 99.1   | 214.8             |
| 19     | A   | 9162   | 4.09     | 5649.0  | 90.3   | 9157   | 3.25     | 1860.3  | 83.0   | 3788.7            |
| 20     | U   | 9144   | 2.90     | 166.3   | 47.6   | 9145   | 2.85     | 574.2   | 83.7   | -407.9            |
| 21     | U   | 9129   | 2.95     | 1962.8  | 94.5   | 9126   | 3.37     | 2146.2  | 72.0   | -183.4            |
| 22     | C   | 9112   | 4.71     | 14226.9 | 138.8  | 9107   | 4.85     | 3686.1  | 89.5   | 10540.8           |
| 23     | U   | 9096   | 4.90     | 8752.8  | 122.2  | 9091   | 4.00     | 4777.4  | 97.7   | 3975.5            |
| 24     | G   | 9082   | 4.75     | 3873.3  | 53.3   | 9079   | 4.70     | 3392.1  | 92.5   | 481.2             |
| 25     | U   | 9065   | 4.95     | 1299.0  | 60.0   | 9063   | 5.50     | 1182.9  | 68.6   | 116.1             |
| 26     | A   | 9046   | 2.90     | 577.4   | 68.3   | 9046   | 1.80     | 1.6     | 18.5   | 575.8             |
| 27     | U   | 9034   | 2.98     | 1156.4  | 83.7   | 9031   | 5.05     | 2713.4  | 76.8   | -1557.0           |
| 28     | A   | 9016   | 3.45     | 4461.4  | 171.8  | 9013   | 4.09     | 1479.0  | 69.8   | 2982.5            |
| 29     | C   | 8999   | 2.90     | 1031.5  | 150.0  | 8996   | 5.15     | 1820.0  | 64.9   | -788.5            |
| 30     | C   | 8981   | 4.37     | 10656.4 | 111.0  | 8978   | 4.79     | 4146.8  | 86.9   | 6509.7            |
| 31     | U   | 8965   | 4.90     | 5285.8  | 221.3  | 8963   | 4.21     | 3646.7  | 92.2   | 1639.2            |
| 32     | A   | 8949   | 4.90     | 29036.3 | 320.0  | 8947   | 4.75     | 4608.8  | 113.8  | 24427.5           |
| 33     | A   | 8933   | 4.66     | 17573.4 | 167.7  | 8927   | 5.65     | 2543.9  | 102.2  | 15029.6           |
| 34     | U   | 8917   | 4.75     | 7895.7  | 184.6  | 8913   | 4.55     | 4508.6  | 109.4  | 3387.1            |
| 35     | A   | 8900   | 4.95     | 30410.1 | 267.9  | 8897   | 4.65     | 5995.0  | 107.1  | 24415.1           |
| 36     | U   | 8884   | 5.05     | 2613.4  | 202.3  | 8880   | 5.05     | 3016.0  | 90.9   | -402.6            |
| 37     | U   | 8868   | 4.60     | 7365.2  | 151.7  | 8864   | 4.70     | 4479.7  | 80.1   | 2885.5            |
| 38     | A   | 8851   | 4.75     | 29184.6 | 210.4  | 8848   | 4.36     | 3523.2  | 70.2   | 25661.4           |
| 39     | U   | 8835   | 4.69     | 55.9    | 162.6  | 8832   | 1.80     | 219.3   | 52.8   | -163.3            |
| 40     | A   | 8819   | 4.20     | 10402.9 | 108.7  | 8815   | 3.69     | 2802.5  | 76.5   | 7600.4            |
| 41     | G   | 8803   | 3.45     | 2507.1  | 73.6   | 8804   | 3.31     | 1698.7  | 72.7   | 808.4             |
| 42     | C   | 8787   | 3.45     | 1105.5  | 65.3   | 8785   | 2.59     | 331.2   | 53.5   | 774.2             |
| 43     | C   | 8769   | 3.45     | 2777.7  | 60.0   | 8767   | 3.54     | 1032.6  | 39.9   | 1745.1            |
| 44     | U   | 8755   | 3.45     | 1537.0  | 47.6   | 8750   | 2.83     | 411.8   | 41.8   | 1125.2            |
| 45     | U   | 8739   | 3.45     | 1276.9  | 54.6   | 8735   | 4.01     | 440.7   | 56.0   | 836.3             |
| 46     | U   | 8722   | 4.60     | 6033.2  | 139.8  | 8720   | 3.59     | 3204.6  | 83.1   | 2828.6            |
| 47     | A   | 8706   | 4.50     | 30827.0 | 155.7  | 8703   | 3.59     | 2755.1  | 78.3   | 28072.0           |
| 48     | U   | 8689   | 3.45     | 54.2    | 91.6   | 8684   | 4.20     | 714.7   | 84.0   | -660.5            |
| 49     | C   | 8673   | 4.83     | 15218.1 | 293.0  | 8669   | 4.49     | 4955.7  | 109.5  | 10262.4           |
| 50     | A   | 8656   | 4.78     | 36126.6 | 303.0  | 8653   | 4.79     | 4587.0  | 103.7  | 31539.7           |

|    |   |      |      |         |       |      |      |        |       |         |
|----|---|------|------|---------|-------|------|------|--------|-------|---------|
| 51 | A | 8640 | 4.80 | 27765.6 | 264.9 | 8636 | 4.69 | 2810.3 | 93.4  | 24955.2 |
| 52 | C | 8622 | 4.75 | 11445.3 | 242.6 | 8618 | 3.43 | 1842.9 | 99.7  | 9602.4  |
| 53 | A | 8605 | 4.83 | 26329.7 | 224.7 | 8601 | 3.14 | 1581.4 | 78.4  | 24748.3 |
| 54 | A | 8588 | 4.78 | 32647.4 | 230.2 | 8585 | 2.84 | 1633.3 | 77.6  | 31014.0 |
| 55 | U | 8573 | 4.70 | 8069.3  | 137.6 | 8571 | 4.74 | 4647.1 | 80.8  | 3422.1  |
| 56 | G | 8559 | 4.51 | 6395.6  | 78.1  | 8557 | 4.89 | 3912.3 | 71.4  | 2483.3  |
| 57 | G | 8544 | 4.35 | 156.6   | 69.7  | 8538 | 4.24 | 242.4  | 47.8  | -85.8   |
| 58 | A | 8529 | 4.25 | 4803.2  | 69.7  | 8525 | 2.59 | 559.8  | 44.6  | 4243.4  |
| 59 | A | 8513 | 3.71 | 3994.0  | 55.4  | 8512 | 2.59 | 587.1  | 45.1  | 3406.9  |
| 60 | U | 8496 | 3.45 | 56.6    | 54.2  | 8495 | 3.09 | 512.8  | 42.8  | -456.2  |
| 61 | C | 8481 | 3.80 | 8029.0  | 76.4  | 8478 | 3.59 | 2925.7 | 47.6  | 5103.3  |
| 62 | C | 8464 | 3.45 | 838.5   | 138.7 | 8461 | 2.66 | 803.8  | 71.8  | 34.7    |
| 63 | C | 8446 | 4.78 | 20839.2 | 196.4 | 8446 | 4.50 | 4707.5 | 130.4 | 16131.7 |
| 64 | A | 8430 | 4.80 | 37862.2 | 227.5 | 8428 | 2.72 | 3096.2 | 150.4 | 34766.0 |
| 65 | A | 8414 | 4.80 | 30759.3 | 247.8 | 8413 | 5.40 | 2338.6 | 183.1 | 28420.8 |
| 66 | C | 8397 | 4.83 | 42189.5 | 343.3 | 8394 | 4.65 | 8671.2 | 183.3 | 33518.4 |
| 67 | A | 8381 | 4.97 | 39851.7 | 411.4 | 8378 | 4.10 | 3760.8 | 118.8 | 36090.8 |
| 68 | A | 8364 | 4.85 | 30690.4 | 345.9 | 8362 | 4.13 | 6255.1 | 93.4  | 24435.3 |
| 69 | U | 8348 | 3.45 | 1751.3  | 78.9  | 8347 | 3.94 | 758.3  | 69.2  | 993.1   |
| 70 | U | 8334 | 4.75 | 8642.8  | 188.8 | 8332 | 3.75 | 4289.8 | 76.0  | 4353.1  |
| 71 | A | 8318 | 4.64 | 36599.3 | 266.2 | 8316 | 3.60 | 2843.6 | 68.0  | 33755.7 |
| 72 | U | 8302 | 3.69 | 3083.5  | 95.6  | 8301 | 3.85 | 1701.4 | 52.8  | 1382.1  |
| 73 | C | 8286 | 3.80 | 7743.0  | 74.7  | 8283 | 3.65 | 3381.7 | 49.6  | 4361.3  |
| 74 | U | 8271 | 3.45 | 370.9   | 77.4  | 8267 | 2.76 | 395.0  | 51.4  | -24.1   |
| 75 | C | 8253 | 3.85 | 4933.9  | 87.2  | 8251 | 3.01 | 2297.9 | 67.1  | 2636.0  |
| 76 | A | 8238 | 4.40 | 20429.7 | 162.3 | 8237 | 3.89 | 2717.7 | 94.3  | 17712.0 |
| 77 | A | 8223 | 4.70 | 12901.9 | 160.8 | 8220 | 4.30 | 2505.7 | 80.8  | 10396.2 |
| 78 | C | 8205 | 4.80 | 5216.8  | 125.8 | 8204 | 4.51 | 2636.4 | 105.6 | 2580.3  |
| 79 | A | 8189 | 4.50 | 9240.3  | 76.0  | 8186 | 4.63 | 3259.4 | 93.1  | 5980.9  |
| 80 | U | 8173 | 4.34 | 1627.5  | 75.4  | 8174 | 3.55 | 1073.6 | 47.9  | 553.9   |
| 81 | U | 8158 | 3.45 | 425.6   | 44.7  | 8157 | 4.60 | 351.4  | 40.1  | 74.1    |
| 82 | C | 8142 | 3.45 | 0.0     | 93.3  | 8140 | 2.99 | 1328.8 | 66.9  | -1328.8 |
| 83 | A | 8126 | 4.35 | 28392.0 | 159.0 | 8126 | 4.17 | 1677.1 | 90.0  | 26714.9 |
| 84 | C | 8108 | 4.21 | 16569.3 | 190.6 | 8107 | 3.92 | 1984.5 | 80.0  | 14584.8 |
| 85 | C | 8092 | 4.45 | 14904.3 | 269.5 | 8091 | 4.36 | 3651.5 | 115.0 | 11252.9 |
| 86 | C | 8075 | 4.46 | 40384.3 | 221.0 | 8073 | 4.27 | 5662.7 | 116.8 | 34721.6 |
| 87 | A | 8060 | 5.13 | 28717.2 | 830.6 | 8058 | 2.73 | 2374.1 | 78.3  | 26343.1 |
| 88 | A | 8041 | 5.52 | 26266.5 | 963.7 | 8041 | 2.98 | 1356.7 | 59.6  | 24909.8 |
| 89 | U | 8026 | 3.37 | 1193.1  | 127.7 | 8031 | 3.33 | 411.6  | 59.6  | 781.5   |
| 90 | U | 8016 | 4.62 | 1303.9  | 159.9 | 8011 | 2.50 | 936.2  | 56.0  | 367.7   |
| 91 | C | 7996 | 3.59 | 4146.0  | 106.2 | 7992 | 3.24 | 1543.7 | 45.1  | 2602.3  |
| 92 | U | 7979 | 3.37 | 882.8   | 55.0  | 7981 | 2.38 | 212.5  | 36.0  | 670.3   |
| 93 | C | 7963 | 4.75 | 4247.6  | 245.5 | 7960 | 2.63 | 1135.2 | 82.0  | 3112.5  |
| 94 | A | 7945 | 4.57 | 40542.6 | 320.1 | 7942 | 4.14 | 4470.3 | 100.6 | 36072.2 |
| 95 | U | 7929 | 3.89 | 6540.4  | 84.8  | 7929 | 5.07 | 4132.8 | 131.8 | 2407.6  |
| 96 | G | 7914 | 3.82 | 2210.5  | 71.1  | 7913 | 5.53 | 1137.3 | 75.4  | 1073.2  |
| 97 | G | 7899 | 3.37 | 662.0   | 69.3  | 7895 | 2.38 | 380.7  | 39.0  | 281.3   |
| 98 | U | 7882 | 4.27 | 3161.0  | 61.9  | 7883 | 4.40 | 1508.9 | 64.6  | 1652.1  |

|     |   |      |      |         |       |      |      |        |       |         |
|-----|---|------|------|---------|-------|------|------|--------|-------|---------|
| 99  | A | 7864 | 4.37 | 9300.5  | 113.7 | 7860 | 4.28 | 2333.0 | 64.1  | 6967.5  |
| 100 | G | 7849 | 4.32 | 2.0     | 141.3 | 7848 | 2.38 | 218.8  | 64.7  | -216.8  |
| 101 | C | 7836 | 4.12 | 4318.1  | 59.3  | 7834 | 4.88 | 2239.7 | 56.9  | 2078.4  |
| 102 | G | 7821 | 3.37 | 468.5   | 72.9  | 7820 | 2.38 | 196.5  | 52.5  | 272.0   |
| 103 | C | 7806 | 3.68 | 6106.7  | 79.7  | 7806 | 2.86 | 804.7  | 64.9  | 5302.0  |
| 104 | C | 7790 | 3.99 | 9980.5  | 116.5 | 7789 | 4.13 | 1766.3 | 80.9  | 8214.1  |
| 105 | U | 7773 | 3.37 | 1467.1  | 95.3  | 7772 | 2.38 | 735.5  | 69.2  | 731.6   |
| 106 | G | 7760 | 3.37 | 342.4   | 67.7  | 7757 | 2.38 | 348.1  | 60.1  | -5.7    |
| 107 | U | 7743 | 3.67 | 8569.7  | 78.0  | 7740 | 3.73 | 3191.7 | 78.3  | 5378.0  |
| 108 | G | 7729 | 3.57 | 2745.7  | 67.7  | 7727 | 3.57 | 1627.3 | 64.5  | 1118.4  |
| 109 | C | 7713 | 3.62 | 4311.5  | 50.9  | 7711 | 3.30 | 1768.8 | 62.6  | 2542.7  |
| 110 | U | 7697 | 3.37 | 3370.3  | 44.5  | 7696 | 3.08 | 1797.7 | 57.1  | 1572.6  |
| 111 | U | 7682 | 4.33 | 4939.9  | 111.0 | 7681 | 3.28 | 1637.9 | 64.2  | 3302.0  |
| 112 | C | 7664 | 4.43 | 14166.8 | 96.1  | 7662 | 3.63 | 4342.0 | 76.5  | 9824.8  |
| 113 | G | 7649 | 3.73 | 2675.0  | 88.7  | 7648 | 3.92 | 1461.6 | 51.0  | 1213.4  |
| 114 | G | 7634 | 3.13 | 1186.0  | 54.7  | 7631 | 1.54 | 207.7  | 52.1  | 978.4   |
| 115 | U | 7618 | 3.89 | 5446.1  | 68.1  | 7618 | 3.17 | 2453.0 | 95.2  | 2993.1  |
| 116 | U | 7604 | 4.22 | 8037.5  | 79.5  | 7601 | 3.68 | 4209.0 | 80.9  | 3828.6  |
| 117 | A | 7588 | 4.12 | 6257.4  | 91.0  | 7586 | 1.48 | 0.0    | 41.6  | 6257.4  |
| 118 | C | 7573 | 3.93 | 3405.4  | 61.9  | 7571 | 3.63 | 1695.7 | 49.1  | 1709.7  |
| 119 | U | 7558 | 3.65 | 4096.5  | 88.2  | 7557 | 3.68 | 2308.3 | 55.6  | 1788.3  |
| 120 | U | 7545 | 3.13 | 385.9   | 33.8  | 7540 | 1.78 | 624.2  | 52.7  | -238.3  |
| 121 | C | 7529 | 3.13 | 33.1    | 25.4  | 7526 | 4.63 | 589.3  | 59.6  | -556.3  |
| 122 | U | 7511 | 4.78 | 3347.4  | 179.5 | 7509 | 4.04 | 1834.4 | 92.2  | 1512.9  |
| 123 | A | 7494 | 4.41 | 33837.7 | 352.6 | 7493 | 4.38 | 4698.1 | 109.6 | 29139.6 |
| 124 | A | 7478 | 4.23 | 35568.6 | 233.7 | 7476 | 4.73 | 3601.7 | 80.1  | 31967.0 |
| 125 | G | 7465 | 3.32 | 2210.5  | 73.9  | 7463 | 3.65 | 1114.5 | 77.4  | 1096.0  |
| 126 | G | 7451 | 4.38 | 6896.1  | 57.1  | 7450 | 4.78 | 4543.2 | 86.5  | 2352.9  |
| 127 | A | 7436 | 4.41 | 4838.7  | 57.4  | 7434 | 4.63 | 2015.5 | 68.6  | 2823.2  |
| 128 | A | 7419 | 4.08 | 3332.6  | 82.4  | 7419 | 4.97 | 438.4  | 76.3  | 2894.2  |
| 129 | G | 7406 | 3.98 | 8156.1  | 76.1  | 7404 | 4.48 | 4837.5 | 87.7  | 3318.6  |
| 130 | U | 7392 | 4.23 | 1043.2  | 56.9  | 7389 | 2.04 | 608.3  | 43.0  | 435.0   |
| 131 | C | 7375 | 3.13 | 228.1   | 43.6  | 7375 | 1.48 | 220.9  | 21.3  | 7.2     |
| 132 | C | 7358 | 4.12 | 3890.9  | 62.2  | 7358 | 1.63 | 885.0  | 48.7  | 3005.9  |
| 133 | A | 7344 | 4.28 | 28470.2 | 117.2 | 7344 | 2.68 | 124.5  | 44.9  | 28345.7 |
| 134 | C | 7327 | 4.10 | 12630.2 | 151.9 | 7327 | 3.78 | 1874.5 | 64.1  | 10755.7 |
| 135 | A | 7312 | 3.87 | 6493.5  | 77.7  | 7307 | 1.82 | 178.8  | 67.1  | 6314.6  |
| 136 | C | 7295 | 4.09 | 6372.6  | 72.4  | 7294 | 2.96 | 1734.3 | 60.0  | 4638.3  |
| 137 | A | 7280 | 3.98 | 13891.8 | 104.3 | 7279 | 2.82 | 816.2  | 63.1  | 13075.7 |
| 138 | A | 7265 | 4.19 | 30728.4 | 191.1 | 7263 | 3.56 | 2993.9 | 81.0  | 27734.5 |
| 139 | A | 7249 | 4.24 | 39762.8 | 213.5 | 7246 | 3.41 | 3675.4 | 78.3  | 36087.5 |
| 140 | U | 7233 | 4.24 | 3208.2  | 190.5 | 7232 | 1.48 | 89.9   | 65.1  | 3118.3  |
| 141 | C | 7218 | 4.34 | 20346.5 | 122.0 | 7217 | 3.22 | 3494.8 | 141.1 | 16851.8 |
| 142 | A | 7202 | 4.19 | 42344.6 | 168.0 | 7200 | 4.01 | 7532.4 | 116.6 | 34812.2 |
| 143 | A | 7187 | 4.15 | 20411.5 | 154.0 | 7185 | 2.89 | 1069.4 | 57.8  | 19342.1 |
| 144 | G | 7171 | 4.34 | 1706.5  | 132.1 | 7170 | 1.48 | 100.4  | 28.3  | 1606.0  |
| 145 | A | 7155 | 3.34 | 4668.3  | 58.6  | 7155 | 1.48 | 0.0    | 7.8   | 4668.3  |
| 146 | U | 7140 | 3.62 | 3859.8  | 68.9  | 7139 | 1.70 | 850.1  | 37.9  | 3009.7  |

|     |   |      |      |         |       |      |      |        |      |         |
|-----|---|------|------|---------|-------|------|------|--------|------|---------|
| 147 | C | 7125 | 3.74 | 5892.3  | 47.1  | 7125 | 1.48 | 675.7  | 53.1 | 5216.6  |
| 148 | C | 7109 | 3.34 | 3373.9  | 58.7  | 7108 | 3.16 | 1611.1 | 62.6 | 1762.8  |
| 149 | G | 7095 | 3.34 | 1465.6  | 63.6  | 7094 | 3.17 | 595.5  | 56.1 | 870.1   |
| 150 | U | 7080 | 3.58 | 4931.1  | 54.2  | 7079 | 2.96 | 2300.3 | 51.0 | 2630.8  |
| 151 | U | 7066 | 3.34 | 2066.3  | 52.2  | 7063 | 2.18 | 982.6  | 52.2 | 1083.7  |
| 152 | A | 7050 | 4.00 | 18008.4 | 155.9 | 7048 | 4.21 | 729.7  | 80.2 | 17278.7 |
| 153 | G | 7035 | 4.09 | 9747.1  | 112.5 | 7034 | 3.56 | 3864.8 | 98.1 | 5882.3  |
| 154 | A | 7021 | 4.09 | 30452.4 | 92.8  | 7018 | 3.12 | 1429.2 | 92.2 | 29023.2 |
| 155 | C | 7004 | 3.91 | 8993.3  | 87.0  | 7002 | 3.76 | 3505.6 | 68.7 | 5487.7  |
| 156 | G | 6991 | 3.44 | 2866.7  | 57.4  | 6988 | 3.34 | 2038.4 | 57.3 | 828.2   |
| 157 | U | 6976 | 3.11 | 2020.3  | 51.4  | 6977 | 2.71 | 1152.6 | 62.1 | 867.6   |
| 158 | U | 6963 | 3.36 | 2803.5  | 37.4  | 6960 | 3.07 | 2366.9 | 81.1 | 436.6   |
| 159 | U | 6946 | 4.54 | 19.1    | 75.6  | 6944 | 1.28 | 16.2   | 64.8 | 2.9     |
| 160 | C | 6930 | 3.89 | 9329.2  | 147.7 | 6929 | 4.07 | 3941.8 | 99.0 | 5387.4  |
| 161 | A | 6916 | 3.88 | 21853.8 | 182.4 | 6913 | 3.83 | 2697.4 | 94.4 | 19156.4 |
| 162 | G | 6901 | 4.11 | 634.8   | 88.5  | 6900 | 1.28 | 78.5   | 37.8 | 556.4   |
| 163 | C | 6886 | 2.88 | 498.1   | 43.3  | 6883 | 1.28 | 293.7  | 23.3 | 204.5   |
| 164 | U | 6873 | 3.45 | 1597.9  | 54.4  | 6873 | 1.28 | 403.2  | 42.3 | 1194.7  |
| 165 | U | 6859 | 2.88 | 959.3   | 49.7  | 6858 | 1.28 | 348.5  | 36.9 | 610.7   |
| 166 | C | 6842 | 2.88 | 302.4   | 35.8  | 6840 | 1.71 | 169.7  | 17.2 | 132.8   |
| 167 | C | 6826 | 2.88 | 3003.9  | 59.1  | 6823 | 1.28 | 371.1  | 14.5 | 2632.8  |
| 168 | A | 6811 | 3.38 | 6706.6  | 115.1 | 6808 | 1.28 | 0.0    | 10.3 | 6706.6  |
| 169 | A | 6796 | 3.73 | 16029.5 | 75.2  | 6792 | 1.28 | 66.1   | 9.6  | 15963.4 |
| 170 | A | 6781 | 3.88 | 23514.1 | 135.6 | 6779 | 1.28 | 72.9   | 16.8 | 23441.3 |
| 171 | A | 6765 | 3.88 | 32749.9 | 143.7 | 6763 | 1.52 | 1033.1 | 33.1 | 31716.7 |
| 172 | C | 6749 | 3.73 | 22056.4 | 98.9  | 6747 | 2.28 | 1423.1 | 57.6 | 20633.3 |
| 173 | A | 6734 | 3.68 | 9055.8  | 104.8 | 6731 | 2.55 | 1499.2 | 71.3 | 7556.6  |
| 174 | G | 6720 | 3.45 | 4838.3  | 90.4  | 6718 | 3.37 | 3224.3 | 71.9 | 1614.0  |
| 175 | A | 6704 | 3.58 | 7666.2  | 85.4  | 6703 | 3.43 | 3517.4 | 63.6 | 4148.9  |
| 176 | A | 6689 | 3.37 | 8469.0  | 88.4  | 6687 | 3.03 | 2135.7 | 58.7 | 6333.3  |
| 177 | G | 6676 | 2.88 | 391.8   | 92.7  | 6674 | 2.58 | 295.4  | 73.9 | 96.3    |
| 178 | A | 6660 | 3.58 | 9725.2  | 75.8  | 6659 | 3.23 | 2701.3 | 88.7 | 7024.0  |
| 179 | A | 6645 | 3.38 | 7215.6  | 66.9  | 6642 | 3.78 | 1428.6 | 51.0 | 5787.0  |
| 180 | U | 6630 | 3.38 | 2430.1  | 60.5  | 6629 | 2.58 | 1135.0 | 47.6 | 1295.1  |
| 181 | G | 6616 | 3.38 | 0.0     | 39.8  | 6614 | 3.33 | 646.1  | 61.2 | -646.1  |
| 182 | U | 6601 | 3.86 | 4810.3  | 76.0  | 6601 | 3.58 | 2773.4 | 63.9 | 2036.9  |
| 183 | G | 6588 | 3.85 | 3428.9  | 79.2  | 6587 | 3.77 | 2922.4 | 89.7 | 506.4   |
| 184 | A | 6572 | 3.53 | 4537.0  | 52.1  | 6567 | 3.58 | 1592.2 | 96.1 | 2944.8  |
| 185 | G | 6559 | 3.55 | 5449.2  | 61.0  | 6558 | 3.16 | 3332.4 | 88.5 | 2116.8  |
| 186 | A | 6544 | 4.04 | 10880.2 | 113.7 | 6544 | 3.04 | 1455.7 | 85.8 | 9424.6  |
| 187 | A | 6528 | 3.93 | 26772.8 | 206.5 | 6525 | 3.14 | 1631.4 | 80.4 | 25141.5 |
| 188 | G | 6515 | 3.38 | 3439.9  | 47.1  | 6514 | 2.80 | 1635.6 | 57.3 | 1804.3  |
| 189 | G | 6502 | 3.38 | 622.2   | 41.0  | 6503 | 2.92 | 105.3  | 24.4 | 516.8   |
| 190 | C | 6488 | 3.38 | 939.9   | 35.2  | 6488 | 3.52 | 48.1   | 33.1 | 891.7   |
| 191 | U | 6474 | 3.73 | 2722.2  | 33.8  | 6473 | 2.95 | 1706.2 | 46.5 | 1016.0  |
| 192 | U | 6460 | 3.98 | 21.9    | 45.0  | 6459 | 2.58 | 177.0  | 36.6 | -155.2  |
| 193 | C | 6445 | 3.38 | 1852.5  | 60.8  | 6444 | 3.90 | 1211.0 | 50.6 | 641.5   |
| 194 | C | 6430 | 4.04 | 17279.5 | 163.7 | 6428 | 3.67 | 4642.3 | 82.8 | 12637.2 |

|     |   |      |      |         |       |      |      |        |       |         |
|-----|---|------|------|---------|-------|------|------|--------|-------|---------|
| 195 | A | 6414 | 3.96 | 15503.6 | 191.7 | 6413 | 3.52 | 2258.5 | 84.2  | 13245.1 |
| 196 | C | 6399 | 3.38 | 3437.7  | 64.8  | 6396 | 3.52 | 1721.1 | 71.2  | 1716.7  |
| 197 | U | 6384 | 3.58 | 3664.4  | 54.2  | 6384 | 2.84 | 2097.5 | 54.1  | 1566.9  |
| 198 | A | 6370 | 3.62 | 7127.7  | 70.4  | 6371 | 2.75 | 456.1  | 75.0  | 6671.7  |
| 199 | A | 6355 | 3.78 | 11684.7 | 105.9 | 6352 | 3.47 | 3604.2 | 77.6  | 8080.6  |
| 200 | G | 6341 | 3.83 | 5429.8  | 85.6  | 6340 | 3.92 | 3164.0 | 112.2 | 2265.8  |
| 201 | G | 6329 | 3.64 | 12530.5 | 67.9  | 6327 | 3.80 | 5212.2 | 107.3 | 7318.4  |
| 202 | C | 6314 | 2.87 | 399.1   | 53.8  | 6313 | 2.15 | 143.6  | 49.5  | 255.5   |
| 203 | U | 6301 | 3.50 | 6736.1  | 58.1  | 6300 | 2.98 | 3581.9 | 58.0  | 3154.1  |
| 204 | A | 6288 | 3.83 | 10940.4 | 68.0  | 6285 | 2.15 | 699.3  | 56.0  | 10241.1 |
| 205 | A | 6273 | 3.83 | 25645.0 | 76.0  | 6271 | 2.67 | 1403.1 | 46.0  | 24241.8 |
| 206 | C | 6258 | 3.23 | 4978.9  | 53.4  | 6256 | 2.53 | 2072.1 | 41.7  | 2906.8  |
| 207 | U | 6244 | 3.63 | 740.2   | 48.4  | 6244 | 2.15 | 93.5   | 96.2  | 646.7   |
| 208 | C | 6229 | 3.50 | 6897.7  | 66.1  | 6227 | 3.31 | 8643.9 | 106.0 | -1746.2 |
| 209 | U | 6215 | 2.87 | 365.6   | 52.3  | 6215 | 2.15 | 117.5  | 55.5  | 248.1   |
| 210 | C | 6201 | 3.22 | 4057.3  | 81.2  | 6199 | 2.41 | 2057.0 | 56.9  | 2000.2  |
| 211 | A | 6187 | 3.42 | 13778.7 | 118.4 | 6185 | 2.35 | 1095.7 | 65.5  | 12683.0 |
| 212 | A | 6172 | 3.23 | 8820.0  | 124.9 | 6169 | 2.85 | 2308.7 | 64.6  | 6511.2  |
| 213 | C | 6156 | 2.87 | 2693.9  | 99.2  | 6155 | 2.77 | 2760.2 | 71.1  | -66.3   |
| 214 | A | 6142 | 2.87 | 8269.8  | 103.3 | 6140 | 2.15 | 1571.0 | 72.6  | 6698.8  |
| 215 | G | 6129 | 2.87 | 4578.0  | 84.8  | 6128 | 2.58 | 2343.4 | 57.9  | 2234.6  |
| 216 | A | 6116 | 3.06 | 7791.1  | 142.9 | 6114 | 2.15 | 0.0    | 51.6  | 7791.1  |
| 217 | C | 6100 | 3.55 | 11174.7 | 170.8 | 6100 | 2.15 | 1325.1 | 68.1  | 9849.5  |
| 218 | A | 6086 | 3.67 | 32885.6 | 165.8 | 6085 | 2.58 | 3369.2 | 63.1  | 29516.4 |
| 219 | A | 6072 | 3.43 | 11942.0 | 116.9 | 6070 | 2.15 | 0.0    | 74.7  | 11942.0 |
| 220 | C | 6057 | 3.62 | 32606.1 | 121.8 | 6055 | 2.77 | 3913.8 | 87.2  | 28692.3 |
| 221 | A | 6043 | 3.42 | 17955.0 | 114.9 | 6041 | 2.15 | 1715.2 | 50.2  | 16239.8 |
| 222 | A | 6029 | 2.87 | 5089.6  | 107.1 | 6027 | 2.15 | 0.0    | 55.9  | 5089.6  |
| 223 | C | 6015 | 3.34 | 17898.5 | 151.5 | 6013 | 2.65 | 1882.8 | 72.5  | 16015.6 |
| 224 | A | 6000 | 3.37 | 19766.7 | 143.5 | 5998 | 1.57 | 1096.2 | 58.2  | 18670.5 |
| 225 | C | 5984 | 2.65 | 5215.1  | 136.9 | 5982 | 1.82 | 870.9  | 75.3  | 4344.1  |
| 226 | C | 5969 | 3.52 | 23804.2 | 174.4 | 5967 | 3.55 | 6791.5 | 89.7  | 17012.8 |
| 227 | U | 5956 | 3.57 | 8663.0  | 127.6 | 5954 | 3.60 | 5433.7 | 83.3  | 3229.2  |
| 228 | G | 5944 | 2.43 | 0.0     | 61.0  | 5942 | 3.90 | 117.7  | 57.4  | -117.7  |
| 229 | C | 5931 | 3.04 | 8468.2  | 71.4  | 5929 | 2.94 | 1816.3 | 52.4  | 6651.9  |
| 230 | U | 5918 | 2.90 | 4956.8  | 57.7  | 5916 | 3.10 | 3144.8 | 67.4  | 1812.0  |
| 231 | U | 5904 | 2.43 | 773.0   | 64.5  | 5904 | 1.52 | 106.5  | 45.7  | 666.5   |
| 232 | C | 5890 | 3.16 | 7801.1  | 107.3 | 5887 | 2.45 | 1595.9 | 58.4  | 6205.2  |
| 233 | A | 5875 | 3.32 | 13762.1 | 94.9  | 5872 | 2.02 | 979.1  | 41.9  | 12782.9 |
| 234 | U | 5860 | 2.43 | 1323.4  | 89.6  | 5857 | 1.52 | 125.5  | 38.6  | 1197.8  |
| 235 | C | 5845 | 3.15 | 10447.1 | 120.1 | 5843 | 2.35 | 1797.9 | 62.1  | 8649.2  |
| 236 | A | 5829 | 3.38 | 12602.1 | 137.0 | 5827 | 2.72 | 1694.5 | 74.6  | 10907.5 |
| 237 | G | 5816 | 3.24 | 9003.7  | 107.2 | 5814 | 2.75 | 2870.6 | 64.5  | 6133.1  |
| 238 | C | 5803 | 3.03 | 4760.2  | 74.1  | 5802 | 2.52 | 968.0  | 34.7  | 3792.3  |
| 239 | U | 5790 | 2.43 | 863.2   | 58.2  | 5786 | 1.52 | 45.1   | 23.2  | 818.1   |
| 240 | G | 5779 | 2.78 | 222.4   | 39.9  | 5777 | 2.56 | 453.1  | 33.8  | -230.7  |
| 241 | U | 5766 | 2.43 | 1304.8  | 20.6  | 5765 | 2.75 | 36.5   | 25.2  | 1268.3  |
| 242 | U | 5752 | 2.43 | 0.0     | 26.2  | 5752 | 1.52 | 94.7   | 19.5  | -94.7   |

|     |   |      |      |         |       |      |      |         |       |          |
|-----|---|------|------|---------|-------|------|------|---------|-------|----------|
| 243 | C | 5738 | 2.88 | 4803.1  | 75.3  | 5736 | 2.01 | 710.3   | 46.1  | 4092.8   |
| 244 | C | 5723 | 3.38 | 10325.7 | 74.9  | 5721 | 2.46 | 1834.1  | 75.7  | 8491.6   |
| 245 | A | 5709 | 3.38 | 18247.4 | 104.2 | 5706 | 3.27 | 4551.5  | 82.2  | 13695.9  |
| 246 | G | 5698 | 3.38 | 8494.6  | 117.0 | 5696 | 3.23 | 5740.9  | 78.9  | 2753.8   |
| 247 | A | 5684 | 3.46 | 4328.5  | 88.0  | 5683 | 2.43 | 1413.0  | 71.1  | 2915.5   |
| 248 | G | 5673 | 3.39 | 2740.5  | 83.4  | 5674 | 3.02 | 1138.3  | 52.2  | 1602.2   |
| 249 | A | 5661 | 3.43 | 28773.7 | 107.3 | 5659 | 3.17 | 1949.5  | 41.3  | 26824.2  |
| 250 | A | 5647 | 2.88 | 1365.6  | 105.5 | 5644 | 2.35 | 451.3   | 33.9  | 914.3    |
| 251 | C | 5633 | 2.88 | 4825.9  | 82.2  | 5630 | 3.42 | 814.1   | 42.5  | 4011.7   |
| 252 | C | 5618 | 3.02 | 6603.7  | 110.1 | 5619 | 2.22 | 519.4   | 54.6  | 6084.3   |
| 253 | C | 5604 | 3.36 | 18027.8 | 166.1 | 5602 | 2.22 | 1685.7  | 47.5  | 16342.1  |
| 254 | C | 5590 | 3.50 | 1965.1  | 89.2  | 5590 | 2.92 | 52.6    | 36.7  | 1912.5   |
| 255 | C | 5575 | 3.10 | 4873.7  | 52.8  | 5572 | 3.03 | 1610.3  | 41.8  | 3263.4   |
| 256 | A | 5561 | 3.23 | 6158.6  | 51.5  | 5559 | 2.83 | 1596.4  | 41.0  | 4562.1   |
| 257 | U | 5547 | 2.88 | 655.2   | 54.9  | 5544 | 2.22 | 27.6    | 33.8  | 627.6    |
| 258 | C | 5533 | 2.88 | 4221.5  | 49.2  | 5532 | 2.22 | 1702.1  | 28.4  | 2519.4   |
| 259 | A | 5520 | 2.88 | 2191.6  | 44.9  | 5519 | 3.08 | 27.7    | 52.7  | 2163.9   |
| 260 | U | 5508 | 3.08 | 3964.0  | 40.4  | 5507 | 3.08 | 2203.3  | 53.1  | 1760.8   |
| 261 | G | 5495 | 2.88 | 0.0     | 52.4  | 5495 | 3.14 | 1511.3  | 49.3  | -1511.2  |
| 262 | C | 5483 | 3.35 | 5555.7  | 78.0  | 5481 | 3.60 | 5289.8  | 42.2  | 266.0    |
| 263 | C | 5469 | 3.30 | 8037.7  | 73.5  | 5467 | 3.27 | 6312.1  | 80.8  | 1725.6   |
| 264 | U | 5456 | 2.88 | 0.0     | 62.7  | 5454 | 2.93 | 687.6   | 120.6 | -687.6   |
| 265 | C | 5442 | 3.23 | 8322.6  | 84.5  | 5441 | 3.80 | 23254.5 | 87.6  | -14932.0 |
| 266 | U | 5430 | 2.88 | 2121.7  | 54.7  | 5428 | 3.80 | 12952.0 | 63.1  | -10830.2 |
| 267 | C | 5416 | 3.19 | 4854.2  | 106.1 | 5414 | 3.75 | 24085.3 | 128.1 | -19231.1 |
| 268 | C | 5401 | 3.45 | 12631.7 | 126.5 | 5400 | 3.75 | 41710.4 | 155.7 | -29078.7 |
| 269 | U | 5389 | 2.88 | 985.9   | 67.1  | 5387 | 3.54 | 2804.7  | 93.4  | -1818.8  |
| 270 | C | 5375 | 3.42 | 671.0   | 73.4  | 5374 | 2.73 | 1160.5  | 63.5  | -489.5   |
| 271 | A | 5362 | 3.57 | 27024.2 | 108.0 | 5360 | 3.61 | 10926.7 | 66.4  | 16097.5  |
| 272 | A | 5348 | 3.47 | 30400.5 | 234.2 | 5346 | 3.60 | 15636.1 | 146.9 | 14764.4  |
| 273 | C | 5335 | 2.93 | 4747.0  | 115.2 | 5332 | 3.40 | 6225.5  | 108.5 | -1478.5  |
| 274 | C | 5320 | 3.19 | 4230.5  | 71.0  | 5318 | 3.23 | 5809.7  | 73.4  | -1579.2  |
| 275 | U | 5308 | 3.19 | 6265.7  | 63.4  | 5306 | 2.95 | 4099.3  | 69.4  | 2166.4   |
| 276 | G | 5295 | 2.90 | 1245.3  | 57.7  | 5294 | 2.02 | 286.3   | 47.4  | 959.0    |
| 277 | C | 5282 | 2.38 | 1610.0  | 25.8  | 5280 | 2.13 | 752.1   | 15.4  | 857.9    |
| 278 | U | 5268 | 2.38 | 853.4   | 75.2  | 5265 | 2.02 | 71.9    | 31.0  | 781.4    |
| 279 | U | 5254 | 3.48 | 9333.4  | 109.1 | 5254 | 2.90 | 829.5   | 44.9  | 8503.9   |
| 280 | C | 5242 | 3.48 | 55291.9 | 111.5 | 5240 | 2.66 | 2476.8  | 52.9  | 52815.1  |
| 281 | A | 5229 | 3.27 | 10109.4 | 82.3  | 5226 | 2.40 | 636.5   | 44.1  | 9473.0   |
| 282 | G | 5218 | 3.14 | 1782.0  | 40.9  | 5216 | 2.75 | 581.0   | 40.6  | 1201.0   |
| 283 | U | 5207 | 3.08 | 3447.8  | 41.2  | 5205 | 2.45 | 1163.4  | 29.9  | 2284.4   |
| 284 | A | 5194 | 2.64 | 1740.4  | 39.1  | 5191 | 2.02 | 162.5   | 19.1  | 1578.0   |
| 285 | C | 5180 | 2.38 | 513.5   | 55.4  | 5178 | 3.40 | 64.5    | 26.7  | 449.1    |
| 286 | C | 5167 | 3.52 | 19607.8 | 60.2  | 5165 | 2.77 | 1979.5  | 48.0  | 17628.3  |
| 287 | A | 5154 | 3.32 | 16611.5 | 145.8 | 5153 | 2.02 | 82.7    | 16.5  | 16528.8  |
| 288 | C | 5140 | 2.38 | 0.1     | 82.9  | 5143 | 2.02 | 310.6   | 23.2  | -310.5   |
| 289 | C | 5126 | 2.94 | 3126.5  | 47.7  | 5124 | 2.72 | 734.1   | 28.8  | 2392.4   |
| 290 | U | 5113 | 2.38 | 511.8   | 56.6  | 5110 | 2.23 | 238.1   | 24.9  | 273.7    |

|     |   |      |      |         |       |      |      |         |       |         |
|-----|---|------|------|---------|-------|------|------|---------|-------|---------|
| 291 | C | 5100 | 2.62 | 2905.7  | 69.0  | 5097 | 2.39 | 744.5   | 28.6  | 2161.2  |
| 292 | C | 5087 | 3.32 | 9431.8  | 144.6 | 5085 | 2.87 | 1703.6  | 54.3  | 7728.3  |
| 293 | A | 5073 | 3.42 | 18661.3 | 116.4 | 5070 | 2.69 | 1569.2  | 56.6  | 17092.0 |
| 294 | C | 5058 | 3.48 | 17569.8 | 159.6 | 5057 | 2.78 | 2027.2  | 62.5  | 15542.6 |
| 295 | A | 5044 | 3.47 | 32802.3 | 354.3 | 5043 | 3.27 | 4821.2  | 64.7  | 27981.0 |
| 296 | G | 5032 | 2.45 | 4070.6  | 228.4 | 5030 | 2.44 | 1560.1  | 78.6  | 2510.5  |
| 297 | A | 5018 | 3.44 | 26798.1 | 162.7 | 5016 | 2.92 | 2241.0  | 59.5  | 24557.1 |
| 298 | A | 5003 | 3.44 | 30373.2 | 221.6 | 5001 | 2.88 | 2499.8  | 61.2  | 27873.3 |
| 299 | U | 4991 | 1.93 | 1870.6  | 154.1 | 4989 | 1.93 | 727.7   | 41.8  | 1142.9  |
| 300 | G | 4979 | 1.87 | 20.9    | 32.0  | 4979 | 2.33 | 459.7   | 22.1  | -438.8  |
| 301 | G | 4969 | 2.35 | 1035.6  | 57.8  | 4968 | 3.16 | 859.5   | 31.7  | 176.2   |
| 302 | G | 4959 | 3.23 | 8484.4  | 84.6  | 4957 | 2.88 | 3245.8  | 60.9  | 5238.6  |
| 303 | C | 4946 | 3.42 | 15525.8 | 89.2  | 4943 | 2.60 | 1294.5  | 43.3  | 14231.2 |
| 304 | C | 4934 | 3.48 | 524.2   | 38.7  | 4929 | 1.30 | 298.4   | 25.2  | 225.8   |
| 305 | G | 4922 | 1.87 | 166.2   | 18.6  | 4920 | 1.12 | 89.7    | 14.6  | 76.5    |
| 306 | U | 4910 | 2.36 | 516.8   | 39.5  | 4909 | 1.12 | 114.4   | 18.1  | 402.4   |
| 307 | A | 4896 | 3.06 | 5432.0  | 43.8  | 4894 | 2.32 | 838.2   | 19.7  | 4593.8  |
| 308 | C | 4881 | 2.65 | 742.8   | 35.6  | 4882 | 1.12 | 24.9    | 10.0  | 717.8   |
| 309 | C | 4868 | 3.19 | 863.7   | 44.0  | 4867 | 1.12 | 0.0     | 5.9   | 863.7   |
| 310 | C | 4856 | 3.44 | 10440.4 | 90.0  | 4855 | 1.32 | 388.2   | 14.3  | 10052.2 |
| 311 | A | 4842 | 3.26 | 30152.3 | 206.4 | 4840 | 1.74 | 640.6   | 45.6  | 29511.7 |
| 312 | C | 4829 | 3.26 | 28316.9 | 177.7 | 4827 | 2.73 | 4887.4  | 86.6  | 23429.5 |
| 313 | A | 4816 | 3.43 | 5887.9  | 65.4  | 4814 | 1.12 | 143.5   | 44.8  | 5744.4  |
| 314 | G | 4805 | 1.87 | 692.0   | 64.8  | 4804 | 1.63 | 870.4   | 29.9  | -178.4  |
| 315 | C | 4793 | 2.60 | 2417.8  | 57.1  | 4791 | 1.60 | 1501.9  | 42.2  | 915.9   |
| 316 | A | 4780 | 3.00 | 6195.6  | 92.8  | 4778 | 3.88 | 2932.7  | 152.0 | 3262.9  |
| 317 | G | 4769 | 3.16 | 7856.5  | 102.7 | 4766 | 3.14 | 11222.4 | 233.0 | -3366.0 |
| 318 | U | 4757 | 3.25 | 9768.8  | 80.3  | 4755 | 3.10 | 15918.1 | 156.2 | -6149.3 |
| 319 | G | 4746 | 2.73 | 1088.9  | 78.3  | 4744 | 3.29 | 5961.8  | 80.6  | -4872.9 |
| 320 | C | 4732 | 2.94 | 4785.4  | 73.6  | 4729 | 3.05 | 5205.1  | 116.7 | -419.7  |
| 321 | A | 4719 | 3.03 | 5684.1  | 54.5  | 4717 | 2.61 | 1962.3  | 65.0  | 3721.8  |
| 322 | U | 4707 | 3.13 | 3115.1  | 51.0  | 4706 | 3.68 | 1011.9  | 76.8  | 2103.2  |
| 323 | G | 4696 | 3.08 | 4747.2  | 66.8  | 4695 | 3.28 | 3328.0  | 43.2  | 1419.1  |
| 324 | A | 4684 | 2.73 | 1236.7  | 46.0  | 4682 | 2.30 | 531.3   | 31.2  | 705.4   |
| 325 | U | 4673 | 2.73 | 0.7     | 49.9  | 4673 | 1.53 | 0.0     | 15.9  | 0.7     |
| 326 | G | 4662 | 3.54 | 1351.7  | 92.3  | 4664 | 1.68 | 466.8   | 26.0  | 884.9   |
| 327 | A | 4651 | 3.20 | 28154.7 | 311.5 | 4649 | 2.57 | 1607.2  | 44.9  | 26547.5 |
| 328 | C | 4638 | 3.20 | 27748.2 | 324.7 | 4635 | 2.73 | 2335.8  | 51.9  | 25412.4 |
| 329 | C | 4624 | 3.35 | 17210.1 | 199.7 | 4622 | 2.95 | 2862.6  | 62.5  | 14347.5 |
| 330 | C | 4611 | 3.28 | 20039.4 | 117.9 | 4608 | 3.14 | 3274.3  | 76.9  | 16765.2 |
| 331 | A | 4599 | 2.85 | 14106.4 | 317.8 | 4598 | 1.65 | 642.3   | 53.2  | 13464.1 |
| 332 | A | 4588 | 3.20 | 27026.6 | 392.4 | 4585 | 2.73 | 1445.5  | 45.6  | 25581.1 |
| 333 | A | 4575 | 3.20 | 31751.0 | 318.9 | 4573 | 2.31 | 2040.3  | 53.6  | 29710.7 |
| 334 | A | 4563 | 2.84 | 17619.4 | 213.3 | 4560 | 1.73 | 632.2   | 29.6  | 16987.2 |
| 335 | C | 4549 | 2.73 | 2092.7  | 133.8 | 4548 | 2.34 | 92.9    | 38.7  | 1999.8  |
| 336 | C | 4537 | 3.08 | 13921.9 | 126.8 | 4535 | 2.47 | 2022.3  | 60.9  | 11899.6 |
| 337 | A | 4525 | 3.00 | 22178.6 | 253.7 | 4523 | 2.38 | 1748.7  | 63.5  | 20429.9 |
| 338 | A | 4513 | 2.99 | 20326.0 | 252.4 | 4510 | 2.87 | 2342.2  | 51.1  | 17983.8 |

|     |   |      |      |         |       |      |      |        |       |         |
|-----|---|------|------|---------|-------|------|------|--------|-------|---------|
| 339 | G | 4501 | 3.20 | 1076.0  | 136.9 | 4499 | 3.02 | 1282.4 | 44.1  | -206.4  |
| 340 | C | 4489 | 2.53 | 5386.6  | 60.6  | 4487 | 2.97 | 3179.6 | 43.9  | 2207.0  |
| 341 | C | 4476 | 2.46 | 2397.6  | 96.2  | 4475 | 2.22 | 928.4  | 37.0  | 1469.1  |
| 342 | A | 4465 | 2.91 | 16773.2 | 179.7 | 4462 | 2.22 | 1063.2 | 35.8  | 15710.0 |
| 343 | A | 4452 | 2.91 | 12882.5 | 128.9 | 4449 | 2.65 | 1994.1 | 52.3  | 10888.4 |
| 344 | U | 4440 | 2.25 | 3470.8  | 95.0  | 4437 | 2.70 | 2089.5 | 47.8  | 1381.2  |
| 345 | C | 4428 | 2.39 | 0.1     | 105.4 | 4427 | 2.22 | 209.3  | 44.5  | -209.2  |
| 346 | C | 4415 | 3.05 | 20409.8 | 201.6 | 4413 | 2.82 | 2972.4 | 50.4  | 17437.5 |
| 347 | A | 4403 | 2.91 | 17754.6 | 184.6 | 4400 | 2.22 | 1143.1 | 42.3  | 16611.6 |
| 348 | U | 4390 | 2.05 | 783.7   | 200.6 | 4386 | 2.65 | 2.0    | 30.2  | 781.7   |
| 349 | C | 4377 | 3.05 | 25104.0 | 304.0 | 4374 | 2.71 | 2150.0 | 32.7  | 22954.0 |
| 350 | U | 4365 | 3.20 | 9065.9  | 156.9 | 4362 | 2.82 | 4032.5 | 51.9  | 5033.4  |
| 351 | G | 4353 | 2.05 | 1384.1  | 89.9  | 4352 | 2.92 | 1036.9 | 28.5  | 347.2   |
| 352 | G | 4343 | 2.05 | 924.5   | 29.5  | 4340 | 2.22 | 522.3  | 33.0  | 402.3   |
| 353 | U | 4332 | 2.39 | 2556.1  | 55.2  | 4329 | 2.40 | 1345.0 | 41.5  | 1211.0  |
| 354 | U | 4319 | 2.48 | 2875.4  | 54.0  | 4317 | 3.08 | 1440.9 | 34.7  | 1434.5  |
| 355 | G | 4310 | 2.05 | 3043.4  | 145.9 | 4308 | 3.03 | 2484.4 | 77.2  | 559.0   |
| 356 | G | 4302 | 3.86 | 13782.5 | 583.9 | 4298 | 3.22 | 8895.2 | 72.7  | 4887.3  |
| 357 | U | 4289 | 3.55 | 9760.6  | 543.1 | 4287 | 3.32 | 2094.4 | 57.8  | 7666.2  |
| 358 | C | 4276 | 3.05 | 24546.6 | 258.5 | 4273 | 3.22 | 3829.8 | 57.6  | 20716.8 |
| 359 | A | 4265 | 3.05 | 24881.7 | 272.5 | 4262 | 3.22 | 5181.7 | 49.1  | 19699.9 |
| 360 | U | 4254 | 3.15 | 8249.9  | 150.5 | 4251 | 3.22 | 3852.7 | 40.7  | 4397.2  |
| 361 | U | 4243 | 2.65 | 0.0     | 54.0  | 4238 | 2.47 | 485.5  | 29.4  | -485.5  |
| 362 | U | 4231 | 1.20 | 72.5    | 7.2   | 4226 | 2.61 | 782.1  | 21.3  | -709.6  |
| 363 | U | 4219 | 1.20 | 0.0     | 54.9  | 4217 | 3.05 | 1162.4 | 39.5  | -1162.3 |
| 364 | A | 4207 | 2.62 | 7547.3  | 134.3 | 4204 | 3.07 | 2334.1 | 53.4  | 5213.2  |
| 365 | C | 4196 | 2.77 | 1219.7  | 216.8 | 4194 | 3.20 | 988.7  | 97.8  | 231.0   |
| 366 | G | 4186 | 3.64 | 4292.0  | 98.4  | 4184 | 4.78 | 3815.6 | 50.8  | 476.4   |
| 367 | G | 4177 | 2.35 | 2137.7  | 82.1  | 4178 | 4.78 | 1635.3 | 63.4  | 502.5   |
| 368 | A | 4166 | 1.71 | 1111.1  | 85.1  | 4169 | 4.08 | 225.1  | 53.8  | 886.0   |
| 369 | C | 4154 | 2.81 | 9058.5  | 112.1 | 4153 | 2.86 | 1337.0 | 34.1  | 7721.5  |
| 370 | A | 4142 | 3.00 | 11515.5 | 121.1 | 4140 | 1.63 | 509.7  | 34.5  | 11005.8 |
| 371 | C | 4128 | 2.96 | 18580.9 | 106.8 | 4126 | 2.83 | 1379.2 | 36.9  | 17201.8 |
| 372 | C | 4115 | 1.20 | 0.2     | 96.4  | 4114 | 3.39 | 274.6  | 34.2  | -274.4  |
| 373 | C | 4103 | 2.93 | 13129.6 | 188.9 | 4101 | 3.43 | 2588.9 | 65.6  | 10540.8 |
| 374 | A | 4092 | 3.20 | 35499.9 | 228.9 | 4090 | 3.05 | 3567.6 | 79.9  | 31932.4 |
| 375 | U | 4080 | 3.24 | 8657.8  | 150.4 | 4078 | 2.98 | 1914.0 | 59.4  | 6743.9  |
| 376 | C | 4068 | 2.91 | 15676.3 | 146.6 | 4066 | 3.01 | 2293.6 | 56.8  | 13382.6 |
| 377 | U | 4057 | 3.20 | 12341.4 | 192.5 | 4055 | 3.24 | 4421.5 | 70.8  | 7919.9  |
| 378 | A | 4045 | 3.00 | 35436.4 | 306.6 | 4043 | 3.39 | 4395.2 | 52.0  | 31041.2 |
| 379 | U | 4035 | 3.00 | 11632.4 | 268.3 | 4032 | 3.43 | 5190.4 | 55.2  | 6442.0  |
| 380 | G | 4025 | 3.20 | 4946.7  | 176.7 | 4022 | 3.21 | 2725.8 | 113.3 | 2220.9  |
| 381 | A | 4014 | 2.32 | 4271.4  | 58.6  | 4012 | 2.27 | 1494.0 | 40.3  | 2777.4  |
| 382 | U | 4001 | 1.20 | 431.0   | 49.8  | 3999 | 1.79 | 823.2  | 34.0  | -392.2  |
| 383 | U | 3991 | 1.20 | 142.4   | 34.8  | 3989 | 1.63 | 537.2  | 14.8  | -394.8  |
| 384 | C | 3978 | 1.65 | 1806.5  | 97.0  | 3976 | 1.63 | 213.9  | 17.0  | 1592.6  |
| 385 | C | 3968 | 4.50 | 170.7   | 229.7 | 3965 | 3.88 | 424.8  | 56.8  | -254.2  |
| 386 | G | 3961 | 4.20 | 13021.7 | 171.3 | 3960 | 4.40 | 5328.5 | 90.0  | 7693.2  |
