# Supplementary material for: RNAthor – fast, accurate normalization, visualization and statistical analysis of RNA probing data resolved by capillary electrophoresis
Source: PubMed Central journal article supplement (PMC7529196; doi:10.1371/journal.pone.0239287), 2020-10-01
Supplement: pone.0239287.s002.pdf [file pone.0239287.s002.pdf]

We thank both Referees for a thorough reading of our manuscript “*RNAthor – fast, accurate normalization, visualization and statistical analysis of RNA probing data resolved by capillary electrophoresis*”. We considered all the remarks, and we substantially revised both - the manuscript and the webserver. The modified fragments of the manuscript are highlighted in red. Below, we respond to all comments of the Referees.

---

### **Response to the comments of Referee #1:**

*Experimental data from RNA structure probing assays in the form of reactivities to structure-sensitive reagents can be integrated with RNA structure-prediction algorithms to improve prediction accuracy. To this end, the raw data is first processed through assay-specific pipelines to get reactivities of nucleotides of RNAs. The reactivities are normalized, and become the input to a structure-prediction algorithm along with the sequences of RNAs of interest. SHAPE-based probing followed by capillary electrophoresis is the traditional way to perform such experiments, and ShapeFinder is a popular tool to estimate reactivities from the electrophoresis data. RNAthor by Gumna et al. primarily serves the purpose of normalizing the reactivities from ShapeFinder and saving files that can be input to RNAstructure. It performs additional visualizations and some statistical tests.*

**Major comment 1:** *Normalization and exploratory visualization of data are important steps of data analysis. Experimental biologists often struggle with this. Hence, a good interactive web application for this would be a great development. Normalization of such data must account for poor quality information for some nucleotides. Gumna et al. have implemented their empirically developed approach to identify and exclude such nucleotides from analysis. This is the primary technical contribution in this manuscript. However, the approach has not been validated or compared with existing approaches. Tests against some benchmark data and performance assessment are required. Besides, the authors have not described the logic behind their exclusion criteria but simply stated them as mathematical rules. Of the three criteria, the one I could interpret --- filtering negative reactivities --- is common practice in the field. The other two criteria have cutoff values for comparison of peak areas, but it has not been ascertained that they are optimal. They have simply been stated as prior empirical knowledge. Hence, the novelty is low.*

**Response:** Let us note that no benchmark data from RNA probing are publicly available. Moreover, scientists working with capillary electrophoresis who publish their probing data, share already normalized values. Therefore, we tested RNAthor on “*ShapeFinder output files (IPF) from published and unpublished SHAPE-CE experiments performed in our laboratory. It was also tested on IPF files from hydroxyl radicals and DMS probing experiments resolved by capillary electrophoresis.*” - this information was already given in the first version of the manuscript. However, we agree that we should have presented the results of our tests in the manuscript. We have filled in this gap now, and, in the Results section, we describe selected tests, present their results and perform a comparative analysis of the results generated by RNAthor with the results from RNA probing data analysis carried out manually by the expert. Note, that such comparison is the only possible one since there are no other automated approaches that combine CE probing data normalization and unreliable data exclusion (this fact was also underlined by the Referee 2).

Regarding the novelty, let us recall that RNAtor is the first tool providing an automated selection of unspecific RT stops for CE-based RNA probing data. It also gives the possibility of interactive RT stops detection via playing with the automatically generated histogram. Both options are not implemented in any other tool. Therefore, we believe the novelty is undeniable.

Finally, note that many modern computational tools and techniques are based on empirical knowledge or knowledge for which the logic behind is hard to be extracted and hardly understandable by a human. Let us mention the crowdsourcing systems or neural networks. No one challenges these solutions because of the lack of easily explainable logic, as they provide satisfactory solutions to important combinatorial problems. Our method of unreliable data detection resulted from years of experience and long-term decision process. The results of our manual analysis of RNA probing data, based on the rules that are now implemented in the RNAtor algorithm, were published in top scientific journals (e.g., Nature Communications, RNA Biology) and never challenged by experts in the field.

**Major comment 2:** *Additionally, the authors claim that RNAtor "significantly reduces the time required for data analysis". However, this is not substantiated by any of the results. I'd rather say that an interactive application such as RNAtor could save the time spent writing scripts for data analysis. The current wording would be appropriate if the manuscript presented algorithmic advances that reduce time complexity of the analysis.*

**Response:** I suppose that the not very precise wording in the manuscript caused the Referee to misunderstand what we wanted to write here. Therefore, we modified this part of the manuscript. It is much easier and less time consuming to use one program (like RNAtor) that processes the data instead of running three others in sequence and doing the manual analysis of the results. Let us explain how the experimenter, having the ShapeFinder data, should proceed to obtain same results as provided by RNAtor: normalize the absolute SHAPE or DMS reactivities with the spreadsheet, generate the histogram representing peak areas for modification reaction and background for each nucleotide, visually identify unreliable data, prepare the reactivity profiles with a graphical software, run the statistical analysis with a statistical program, prepare a file in the SHAPE data format (\*.shape) compatible with the structure prediction software, run RNAstructure with probing data as an additional input. All these tasks take more time when done separately than when they run automatically in one pipeline, like in RNAtor. However, a reliable analysis of time complexity of manual data processing is rather impossible to do. Let us recall that in computing science, time complexity (known also as computational complexity) is estimated based on the number of basic operations (like comparison, simple mathematical operations, elements swapping, etc) done by the algorithm to solve the problem. We can estimate the complexity of all the operations in RNAtor, but we cannot do it for manual data processing. The time spent on manual analysis strongly depends on the experience of the experimenter. In the case of processing data from ShapeFinder, it can take one day for a beginner student and 1-2 hours for a trained experimenter, who has a workshop and scripts ready for simple data processing. Using RNAtor, the same people will do it in 2-3 minutes (if this is not the first time they use the tool) or 30 minutes (if we include the time for reading help).

**Major comment 3:** *Further, the authors have motivated the manuscript in several places by claiming that SHAPE followed by capillary electrophoresis and analyzed by ShapeFinder is a widely recommended approach to study RNA structures. However, the references to support these*

*assertions are often old papers from one particular lab. Hence, the application seems to be of limited interest.*

**Response:** First, let us note that, following good and proper scientific practice, we have cited the original papers, which present the ShapeFinder method - experienced scientists are aware of the fact that this is the right approach (citing the original publication first instead of citing a paper that cites the origin). Obviously, these are papers from one lab where ShapeFinder was developed, and - obviously - the papers are not the recent ones because the method was introduced in 2008. These highly cited examples of ShapeFinder applications are often treated as milestones in RNA probing studies. However, to give examples of SHAPE-CE and ShapeFinder software usage we also cited 4 papers published in 2017 and 2 papers from 2019.

Second, we never claimed that *SHAPE followed by capillary electrophoresis and analyzed by ShapeFinder is a widely recommended approach to study RNA structures*. In the paper, one could find the following statements: (a) SHAPE-CE with ShapeFinder analysis is popular approach - see citation data below, (b) CE serves as a gold standard method for the single-nucleotide resolution of cDNA fragments from SHAPE or other RNA probing experiments - SHAPE NGS methods were validated using SHAPE-CE, e.g., the accuracy of SHAPeMap with SHAPeMapper1 or SHAPeMapper2 and SHAPE-Seq were tested using capillary electropherogram data (Siegfried et al 2014, Busan et al. 2018, Lucks et al 2011).

ShapeFinder is used in labs that perform capillary electrophoresis and a quick look into the worldwide bibliography, and into the citation record of the original papers proves this fact: the first ShapeFinder paper: 160 citations in Web of Science, 220 in Google Scholar; recent citations dated January 2020. Nevertheless, to solve the Referee's doubts, we have added the references to the other papers concerning studies performed using ShapeFinder and QuShape. We also added the information on NGS-based RNA probing methods.

**Minor comment 1:** *It would be nice to have a standalone version of the application.*

**Response:** We have over 10 years of experience in developing bioinformatics programs. During this time, we have developed over 20 different systems for structural bioinformatics: 15 of them are web applications, and 5 are standalone programs. Some reviewers used to ask for the second version of the program: when we publish a web application, they ask for a standalone version, and when we release a standalone version, they require a web application. Such a request, however, should be justified in substance.

We always try to respond to the needs of our users, and after many years of experience, we know what is critical. A standalone version is very useful when it can be run from a command-line. Such a version is needed when users process huge amounts of data at a time (which is not the case of processing data from capillary electrophoresis) and/or when they do not interfere in the computational process (i.e. do not set a lot of parameters, do not make choices during the calculation process). In the case of interactive programs (RNAtThor aims to be interactive), such versions are rather useless. Of course, there are also standalone versions with GUI, not dedicated to high-throughput analysis. They require users to download the program, configure the environment, often also download and install additional software or libraries - many users do not like it. Therefore, in many cases, the best choice is to have a web application. Let us recall the

advantages of such solution: all responsibility for the maintenance of the program and the provision of computing power lies with the authors of the program, they can improve the program, remove bugs, add new functions and make the updated version immediately available online (so the users are not requested to update their standalone version, they just have the newest version already on), users do not worry about whether the program is compatible with their operating system and working environment. The only things which are required to use a web application are the internet connection and a web browser - no problem for any scientist these days. We developed RNAtbor as the web application taking into account all of these reasons. We do not think that a standalone version is needed at this moment. But in the case of many requests for such a version from our users, we will provide it in the future.

**Minor comment 2:** *What happens to data uploaded on the server if the user doesn't make an account? Is it also stored on your server for months? Please comment if there any data security issues.*

**Response:** The input data and the corresponding results are stored in the RNAtbor system for 3 months for registered users (available from their workspace); 3 days for guest users (available on the result page with the unique URL); 24 hours in the case of exemplary input processing (if the user clicks on *Run for example SHAPE data* or *Run for example DMS data*; results are available on the result page with the unique URL). Indeed, this information was not complete in the previous version of the RNAtbor's Help file. It is now available in Help section "2.7. Output data". All the information concerning data issues is also provided in the "Terms and conditions" page (see: <http://rnatbor.cs.put.poznan.pl/terms>). The link to this page is placed in the bottom navigation bar of RNAtbor.

**Minor comment 3:** *Page 10, line 207 says "averaged normalized SHAPE data with standard deviation". Is this referring to average across nucleotides or samples?*

**Response:** The average and standard deviation are calculated separately for each nucleotide across samples. We added this information in the manuscript now.

**Minor comment 4:** *Page 11, lines 232-239 describe additional statistics computed by RNAtbor. However, the purpose behind these specific statistical tests and what the users could do with them is missing.*

**Response:** Statistical tests aim to assess reproducibility and possibly also structural variation. Combining statistical information from a probing experiment with the analysis of nucleotide reactivities and the thermodynamic model of RNA folding is also a good and desirable practice. Such an approach can improve the accuracy of probing-directed structure modeling, and allow additional information to be extracted from structure probing data - whether a base is in the single-stranded or double-stranded region. One can find many examples of using similar statistical tests for SHAPE and DMS data analysis e.g. Wilkinson K.A. et al. *PLoS Biol.* 2008; Purzycka, K.J. et al. *Nucleic Acids Res* 2013; Li, P. et al. *Cell Host Microbe*, 2018; Huber, R.G. et al. *Nat Commun* 2019; Simon, L.M. et al. *Nucleic Acids Res* 2019 and many others. We reworded the fragment concerning the statistical analysis, and we hope this information is much clearer now.

---

## Response to the comments of Referee #2:

*The manuscript by Gumna et al. presents a web-based platform for quality control of RNA structure probing data obtained by experiments that combine SHAPE chemistry with capillary electrophoresis (CE) quantification of the SHAPE reaction's cDNA products. The platform takes a SHAPE reactivity profile as input and performs automated data normalization, needed to bridge between different experimental conditions and different RNAs, and automated detection of unreliable data points. Users can also visualize the data and run a statistical test that aims to assess reproducibility and possibly also structural variation.*

*This work tackles a very important aspect of structure probing data analysis, in particular one that has not received sufficient attention to date. Normalization and other quality control steps remain a relatively unexplored area, and researchers often resort to one of a few popular strategies, which many find to be over-simplistic, too narrowly focused, and generally unsatisfactory. As such, this work has the potential to have real impact. However, more work is needed on the authors' side to bring this work to its full potential, in particular, more testing and a solid convincing demonstration of the utility and validity of the proposed approach.*

**Comment 1:** *Several things are missing. First, there are many methods and tools for SHAPE data analysis, currently disregarded by this work. Only 2 software platforms, ShapeFinder and QuShape, are mentioned here, but so many other tools were developed over the last 5-6 years. It is true that newer tools were designed with Seq/MaP/MaPseq protocols in mind; however, this is irrelevant because the proposed platform accepts reactivities as input. It doesn't matter how reactivities were obtained, as reactivities processed from next-gen or from CE platforms are still reactivities. It has also been shown multiple times (mainly by the Weeks lab) that next-gen-based reactivities have very similar statistical properties to the one obtained by CE platforms. Accounting for other data processing platforms is important because they offer similar normalization routines, and in fact, most of them feature additional popular normalization routines. This, in turn, impacts the novelty of the proposed platform. What I find to be unique to this work is the authors' approach to automating quality control, particularly the removal of potentially unreliable data points. I don't think other platforms offer something similar, but this leads me to my second point, which is that the manuscript lacks any demonstration of the performance of the approach (or any other feature unique to this work, such as reproducibility assessment). I understand the authors have gained substantial experience analyzing structure probing data, but the fact that they believe their method "works well" is insufficient for publishing it. The only way to get users to try this out is by showing them, visually and also quantitatively, that the outputs are indeed robust and reliable. I have referred to this issue in more details in my comments below.*

**Response:** First, let us recall that RNathor has been developed for automatic normalization, visualization and statistical analysis of CE-based RNA probing data, not for NGS-based data analysis. Therefore the tools dedicated for NGS-based probing experiments were not mentioned in the original manuscript. However, we have written about them in the revised version.

Second, we found the suggestion of the Referee to test the RNAtor normalization function on the NGS data very interesting. Thus, we have investigated the problem but we have found that NGS-platforms have their own normalization tools. Therefore, it is not necessary to implement additional high-throughput data analysis functions in RNAtor - the tool designed for low- and medium-throughput CE-based data processing. Moreover, a comparison of normalization done by RNAtor and NGS platforms is impossible. The platforms for NGS data analysis don't accept ShapeFinder output files (we tested it for SHAPeMapper and RNA Framework). Interestingly, although the option of the analysis of ShapeFinder files is provided in QuShape it does not work. Summing up, the suggestion that RNAtor should analyse all possible data is out of the question, since even the existing, widely used systems do not do so.

However, we significantly extended the scope of RNAtor by adding new tools that facilitate automatic exclusion of unreliable data and normalization of QuShape output files. We added the possibility to process DMS probing data. Moreover, users can obtain the secondary structure predicted for the RNA sequence provided at the input. RNAtor automatically executes the incorporated RNAstructure algorithm that supports SHAPE / DMS data-driven prediction. The graphical diagram of the structure is colored according to the color scheme defined for the default reactivity ranges. The output structure is also encoded in the dot-bracket notation.

Third, we tested RNAtor on “*ShapeFinder output files (IPF) from published and unpublished SHAPE-CE experiments performed in our laboratory. It was also tested on IPF files from hydroxyl radicals and DMS probing experiments resolved by capillary electrophoresis.*” - this information was already given in the first version of the manuscript. However, we agree that we should have presented the results of our tests in the manuscript. We have filled in this gap now, and, in the Results section, we describe selected tests, present their results and perform a comparative analysis of the results generated by RNAtor with the results from RNA probing data analysis carried out manually by the expert. Note, that such comparison is the only possible one since there are no other automated approaches that combine CE probing data normalization and unreliable data exclusion.

**Comment 2:** *Finally, I wonder why the authors limit consideration to both SHAPE data and CE-based platforms. I think the scope of their work could be extended relatively easily. As I mentioned above, any reactivity profile needs to be normalized and quality-controlled. Furthermore, the bigger a dataset is, the more critical automation is, so why not consider the plethora of datasets obtained by high-throughput sequencing-based experiments? I also don't see a reason to limit this work to SHAPE data. There are many popular alternatives today, including DMS, HRF, and several SHAPE variants, such as NAI. I understand the authors may have tailored their automated QC routine to the special properties of SHAPE, but it is worth testing how well it does on DMS data. Additionally, as shown by several labs, SHAPE-CE, SHAPE-MaP, and SHAPE-Seq all generate very similar data, so why not extend the scope at least in the context of the SHAPE probe?*

**Response:** RNAtor was never limited to the SHAPE data. In the first version of the manuscript, we have already written that RNAtor was extensively tested using SHAPE, DMS and hydroxyl radical data. To make it clear now, we have added the DMS example in the webserver, so that the user can try the tool for these data as well. We have also added an option to enable automatic selection of DMS reactivities for an exclusion. See also our response to Comment 1, concerning NGS data processing.

**Comment 3:** *To summarize, this work needs to be revised to account for a large body of work from labs other than the Weeks lab and for recent advances in structure probing experimental and data analysis capabilities. However, at the same time, it could also leverage the recent expansion in the scope of structure probing to provide a tool of much broader applicability than its current designation, especially because it targets a step in data analysis which has not been adequately addressed to date. Detailed comments and suggestions are below.*

**Response:** Please see our response to comment 1 and 2.

**Comment 4:** *There is some novelty in the automation of selection of reactivities for exclusion from analysis based on background signal. To the best of my knowledge, this type of quality control is normally done manually. However, the manuscript and the proposed tool target analysis of relatively short RNAs (no longer than ~300-500 nt) due to SHAPE/DMS and CE limitations. In such cases, manual/visual inspection of the signal and the background traces is not so time-consuming.*

**Response:** Let us explain that ~300-500 nt is the length of one CE read, not the length of analyzed RNA. Users can process much longer RNAs; using normalized overlapping CE reads we analyze RNAs > 5kb nucleotide-long (Andrzejewska et al., in revision). RNAtor is not limited to short RNAs - we did not write anything like this in the manuscript. Note also that RNAtor offers more than just an automated selection of reactivities. We recommend to look at the charts, violin plots, or box plots prepared by our tool and try the statistical analysis. These are very useful features of RNAtor. We hardly believe anyone does all of this manually, even for relatively short RNAs.

**Comment 5:** *The authors also claim that the proposed automation of selection “works well for SHAPE experiments performed in vitro or in vivo”(page 8). There are two key issues with this statement. First, it is not supported by evidence. Second, it is not clear how the authors determine that their method “works well”. I understand that this statement is based on vast experience with SHAPE data analysis, but this is not convincing from a reader’s perspective, and the readers are your potential users. I would like to see numerous real SHAPE data traces (in vitro and in vivo) from more than one lab, for which the automated method works as well as manual correction. This, in turn, requires a suitable quantitative assessment metric. Since currently there is no consensus metric for evaluating “goodness” of SHAPE data, the authors could come up with their own metric, as long as it is appropriate and convincing. Some investigators use SHAPE-directed structure prediction accuracy to benchmark the performance of data processing pipelines. However, I don’t find that convincing (unless differences are truly dramatic) because the NNTM model introduces so much additional complexity and uncertainty to the output. Another way is to show that agreement between replicates improves after the automated routine is applied to the data. Microarray informatics method developers commonly use this approach to demonstrate that a proposed pre-processing step is effective. Existing measures of replicate agreement that are specialized to structure probing data are found in Choudhary et al., Bioinformatics, 2016 and Choudhary et al., Genome Biology, 2019. Alternatively, the authors could propose a novel quantitative measure that captures those data characteristics that make them think it “works well”.*

**Response:** First, let us note that in this comment the Referee denies what he/she wrote in Comment 1. Let us quote from Comment 1 “It doesn’t matter how reactivities were obtained...”, “reactivity

*normalization is independent of how reactivities are obtained*". According to this, reactivities obtained in vitro, in vivo, ex vivo, in virio, ex virio are still reactivities and do not require separate routines of normalization or selection of unreliable data.

Second, we agree that we should have provided the results of RNAtor testing. Therefore, we have revised the Results section and we included the results of computational tests performed with RNAtor to validate its reliability. Let us add that no benchmark data from RNA probing are publicly available. Generally, if the authors provide (as supplementary data) reactivity values they are already normalized and unreliable reactivities are set to -999. Therefore, wide computational tests of our tool were hardly possible based on what we found in the worldwide repositories of RNA probing data. To validate the automatic algorithm of RNAtor, we used in vitro and in vivo SHAPE data traces from our lab, which come from real experiments and are of very good quality. Researchers from our labs have a solid background and years of experience in RNA structure probing using SHAPE-CE, DMS-CE and HR-CE. We checked the validation of other tools for RNA probing data analysis (ShapeMapper1 and 2, ShapeFinder, QuShape, RNA Framework) and we found that these tools were also tested using diverse RNAs probed only in the labs of the software's authors.

Finally, the approach discussed by the Referee, measuring the replicate agreement (SEqualyzer), serves for quality control and exploratory analysis of high-throughput RNA structural profiling data, whereas RNAtor was designed for low-throughput data analysis and visualization. Therefore, we do not find it useful in our case.

**Comment 6:** *Data normalization: The authors implemented the popular box-plot method, but they caution the reader to avoid using it for RNAs shorter than 300 nt (page 9). So what should a user do if he/she is studying a relatively short RNA? This lack of options severely limits the utility of the proposed platform. Please also see my other comment below regarding normalization strategies that other data analysis platforms offer. How about providing an alternative strategy for relatively short RNAs?*

**Response:** We thank the Referee for this comment. We improved the normalization method in RNAtor to allow normalization of short RNAs as well. According to a common approach in the box-plot method of normalization, outliers are determined as follows: for RNAs longer than 100 nucleotides no more than 10% of the data are removed, while for shorter RNAs maximum 5% of data are removed. We added this information in the manuscript.

**Comment 7:** *Some statements need to be toned down and/or revised. For example, "Currently, the most common method of RNA chemical probing is SHAPE used in conjunction with capillary electrophoresis (SHAPE-CE)" (Abstract). While it is true that SHAPE used to be the most popular method for a decade or so, DMS appears to be as popular as SHAPE nowadays. I think it is more appropriate to say that one popular reagent choice is SHAPE. Note that there is a similar statement in the Introduction section, which also needs to be reworded. Additionally, I think that over the last 2-3 years, SHAPE/DMS in conjunction with next-gen sequencing (via Seq or MaPseq protocols, and very recently, also via direct RNA nanopore sequencing) has become a much more popular choice than traditional CE-based structure probing. A quick literature search would reveal both the widespread use of DMS for modification and the widespread reliance on NGS for cDNA sequencing. Another statement I found to be somewhat outdated is "ShapeFinder is a*

*popular computational tool for the extraction of quantitative SHAPE reactivity values from raw CE electropherograms.” To the best of my knowledge, many labs use QuShape (a newer and more automated SHAPE-CE analysis software from the Weeks lab) and others use in-house scripts. While ShapeFinder used to be the platform of choice for SHAPE-CE analysis, a quick literature search will show this is no longer the case, especially over the last 2-3 years. Note, however, that I acknowledge there are major issues with QuShape’s performance, as I know that many labs are unhappy with it and seek better alternatives. Finally, I also find the statement “... manual normalization of these values to a uniform scale and exclusion of unreliable data are both required before their usage by RNA structure prediction software” to be somewhat misleading because QuShape does feature reactivity normalization and might also allow users to exclude unreliable data (not sure about the latter, though). The way the abstract is worded, one might think that users currently have no software tools for normalizing the data and possibly also excluding unreliable measurements, and I don’t think that is indeed the case.*

**Response:** Following the Referee’s suggestion, we have revised many statements in the manuscript. Moreover, we have substantially extended the functionality of RNATHOR and - currently - it can also process the DMS data and SHAPE data obtained from QuShape. We find ShapeFinder a popular tool, but it is true that QuShape also has many supporters. Let’s take a look at the facts: according to the Web of Science, ShapeFinder paper has 160 citations (recent ones from January 2020), QuShape paper - 109 citations. As for the in-house scripts, it is rather hard to discuss their popularity, since such solutions are used only locally.

**Comment 8:** *In continuation to my previous point, there are multiple software platforms, other than QuShape, which allow users to normalize structure probing data. In contrast to ShapeFinder and QuShape, these platforms were designed for NGS-based probing data, hence the initial input to these tools must take the form of reads, FASTA files, or read counts. However, once reactivities have been calculated, these softwares could be used to apply several different normalizations to them. In other words, reactivity normalization is independent of how reactivities are obtained. They may be obtained from CE or NGS data, using a variety of platforms, but once you have them, they can be normalized by numerous existing platforms. For example, SEQUALYZER (Choudhary et al., Bioinformatics, 2016) features 2 normalization strategies: 2-8% and box-plot, RNA Framework (Incarnato et al., NAR, 2018) features 3 normalization strategies: 2-8%, box-plot, and 90% Winsorization, and StructureFold (Tang et al., Bioinformatics, 2015) features (via the Galaxy platform) 2-8% normalization and an option to cap reactivities. Some of these platforms also provide data visualization, for a single experiment and sometimes also for replicates. Some platforms are also open-source (e.g., SEQUALYZER and RNA Framework) and this, in turn, allows users to directly use their normalization modules. All this prior work is missing from this manuscript, which might create an impression that users currently have no automated way of normalizing SHAPE/DMS reactivities, which is incorrect. Moreover, the most popular normalization strategies are likely 2-8% and box-plot and are described in detail in Sloma and Mathews, Methods Enzymology, 2015. In fact, one could easily implement them in a Matlab/R/Python script and I disagree with the authors that they “require significant user training and are ... time consuming and prone to errors”.*

**Response:** First, let us note that in this comment the Referee denies what he/she wrote in the beginning of the second paragraph of THIS review: “This work tackles a very important aspect of structure probing data analysis, in particular one that has not received sufficient attention to date.

*Normalization and other quality control steps remain a relatively unexplored area, and researchers often resort to one of a few popular strategies, which many find to be over-simplistic, too narrowly focused, and generally unsatisfactory.”* Second, in our opinion an analysis of NGS-based data is outside the scope of this work. See also our response to comments 1, 2 and 5.

**Comment 9:** *Page 4, second sentence: the description of SHAPE is limited to traditional truncation-based SHAPE chemistry. However, since 2014, modifications are alternatively detected via the MaP approach, where the RT introduces mutations at modified sites. This strategy can only be used in conjunction with DNA sequencing, which is likely why it is not mentioned here. However, for the text to be to be more accurate and up-to-date, I think it should be mentioned.*

**Response:** We thank the Referee for this comment. We introduced additional descriptions in the manuscript.

**Comment 10:** *Results, subsection “A brief overview of SHAPE-CE raw data analysis using ShapeFinder software”: I think this should be omitted or at the least moved to the Supp. Material because knowing how ShapeFinder works is not necessary for understanding the authors’ work. This is because both normalization and detection of unreliable data points (i.e., data QC) occur after the output from ShapeFinder has been obtained. Furthermore, ShapeFinder does not trigger the issues that normalization and data QC address. These issues are inherent to chemical modification experiments.*

**Response:** Indeed, the Results section was not the right place to describe the analysis of SHAPE-CE data with ShapeFinder. We substantially revised the manuscript and this part was removed.

**Comment 11:** *Results, subsection “RNathor web application”: I find this material to be suitable for a user manual, especially the description of the various buttons, Reference page, Contact page, and Terms and Conditions page. These are not necessary for understanding the work or getting an idea of how user-friendly it is. It should be possible to compress this subsection into the most essential 4-5 sentences that refer to the ease of use and web interface. I also strongly encourage the authors to compile a short user manual and make it available on the platform’s webpage.*

*Results, subsection “Input Data”: Similar comments as above. The description is too detailed and should be substantially shortened (e.g., no need to mention which button to press).*

*Results, subsection “Output Data”: Similar comments as above.*

*Results, subsection “Output Data”: Note that most or all existing structure probing data analysis pipelines feature data visualization, not only ShapeFinder and QuShape. Some pipelines also allow users to visualize several reactivity profiles together.*

**Response:** According to the Referee’s suggestion, we have removed the detailed description of the web application from the manuscript. Also the fragments about input and output data were reduced. Some fragments were moved to Help, which already existed before, but many details were missing there. Therefore, the RNathor Help was also substantially extended.

**Comment 12:** *Results, subsection “Additional Analysis of Normalized SHAPE-CE Data”: I agree with the authors that SHAPE/DMS data departure from a normal distribution. In fact, it has been*

*rigorously established multiple times that this departure is quite significant (see, for example, Sukosd et al., NAR, 2014, Eddy, Ann. Reviews Biophysics, 2014, Deng et al., RNA, 2016). I therefore do not see why a test for normality is implemented. If the authors have SHAPE data that is nearly Gaussian, I would like to see it appended as Supp. Material.*

**Response:** We did not intend to suggest that our SHAPE data are nearly Gaussian. We have applied the standard pathway of statistical analysis here.

**Comment 13:** *Results, subsection “Additional Analysis of Normalized SHAPE-CE Data”: To facilitate differential reactivity analysis between two samples and/or to assess reproducibility across experiments, the authors implemented a Mann-Whitney U test, aka Wilcoxon rank-sum test. Note that a very similar test, namely, a Wilcoxon signed-rank test, was recently used for differential reactivity analysis in Choudhary et al., Genome Biology, 2019, albeit applied to similarity scores, not reactivities. The Wilcoxon rank-sum test makes an independence assumption, whereas the signed-rank version of the test relaxes this assumption. Can the authors justify their assumption that the compared samples are independent, especially if these are replicates of the same experiment? Additionally, note that the proposed test does not account for biological variation between samples, since one needs  $\geq 2$  replicates from each condition/experiment to assess biological variation per condition. What this means is that if one performs the experiment on two biological replicates (especially relevant to in vivo samples), the test might indicate that results are not reproducible because it picks up the biological variation in the RNA’s structure and its reactivity to the SHAPE reagent. I think it is important to alert users to the limitation of the proposed test and to emphasize what it is capable of detecting. This limitation is inherent to any differential analysis test that compares between reactivity profiles without pre-assessing biological variability between samples in a condition.*

**Response:** RNAtor incorporates statistical tests used by many labs (including Weeks lab) in which CE experiments are performed. These experiments result in obtaining independent samples, therefore the choice of non-parametric Mann-Whitney test (if the user selected 2 experiments) and Kruskal-Wallis rank-sum test (for 3-5 experiments). Let us underline these tests are not our choice. We implemented solutions already applied successfully in many laboratories.

**Comment 14:** *As with the automated QC routine, I am missing a demonstration of the utility and the validity of the proposed statistical test. This could be done via benchmarking against existing methods (see, for example, Choudhary et al., Genome Biology, 2019 for a benchmark of recent methods). Potential users need to see some concrete evidence that the proposed test has statistical power. Alternatively, at the least, the authors should show examples of reproducible and irreproducible traces and their corresponding test scores as well as examples of how the test performs on biological replicates vs technical replicates. A comparison with existing reproducibility (QC) measures could also be helpful.*

**Response:** Unfortunately, we do not understand this comment. Why should we validate and show statistical power of statistical tests which exist from years? This is the duty of the authors of the tests not of its users. See also REsponse to the previous comment.

**Comment 15:** *It is clear that the authors have gained tremendous experience analyzing CE-based structure probing data, and that the proposed platform is the result of years of empirical hands-*

*on experience. This is invaluable, especially since there aren't many labs with that level of expertise. For this reason, this work has the potential to lead to real advances in data analysis. In particular, the authors say "RNAtbor was extensively tested on ShapeFinder output files (IPF) from published and unpublished SHAPE-CE experiments performed in our laboratory. It was also tested on IPF files from hydroxyl radicals and DMS probing experiments resolved by capillary electrophoresis." I think what's really missing in this manuscript, other than an up-to-date review of existing work, is a demonstration of improved performance on many real datasets from multiple probes, multiple conditions, multiple labs, and multiple RNAs. Such demonstration should also include comparisons to existing alternatives, and there are several ones other than ShapeFinder and QuShape.*

**Response:** We thank the Referee for appreciating our expertise in analyzing CE-based data. We would very much like to test our tool on many data sets from other laboratories. Unfortunately, it is not possible because other labs do not publish raw data from capillary electrophoresis. We have put a lot of effort into searching for such data and contacting other laboratories to obtain data for testing but we were unsuccessful. We also searched the literature, since some authors claimed to provide their raw data in supplementary materials. Unfortunately, it turned out that even in cases, where the authors of the publication attached supplementary files described as raw data, the files contained normalized data. Therefore, it is not possible to demonstrate the performance of RNAtbor for multiple probes from external labs. We could only do it for data obtained in our laboratory, and we already did this before our paper submission. However, we agree that a demonstration of the tool's performance is important. Thus, we substantially revised the Results section and we described exemplary comparative experiments performed with RNAtbor. We compared the results obtained by RNAtbor with the results received from manual analysis done by the expert, for exemplary SHAPE and DMS data.
